# Supplementary material for: Defluorinative functionalization of perfluoroalkyl alkenes with ureas: synthesis of C4-perfluoroalkenyl 2-imidazolones
Source: Royal Society of Chemistry journal article supplement (doi:10.1039/d4qo01173b), 2024-01-01

## Supporting Information

# Defluorinative Functionalization of Perfluoroalkyl Alkenes with Ureas: Synthesis of C4-Perfluoroalkenyl 2-Imidazolones

Wei Han,<sup>a</sup> Ming-Yao Tang,<sup>a</sup> Ye-Kun Chen,<sup>a</sup> Mengtao Ma,<sup>b</sup> Zhi-Liang Shen,<sup>\*,a</sup> and Xue-Qiang  
Chu<sup>\*,a</sup>

<sup>a</sup> Technical Institute of Fluorochemistry, School of Chemistry and Molecular Engineering, Nanjing Tech University, Nanjing 211816, China. E-mails: ias\_zlshen@njtech.edu.cn; xueqiangchu@njtech.edu.cn.

<sup>b</sup> Department of Chemistry and Materials Science, College of Science, Nanjing Forestry University, Nanjing 210037, China.

### Table of Contents

|                                                                                                      |          |
|------------------------------------------------------------------------------------------------------|----------|
| General information                                                                                  | Page S2  |
| General procedure for the synthesis of perfluoroalkyl alkenyl iodides <b>1</b>                       | Page S2  |
| General procedure for the synthesis of ureas <b>2</b>                                                | Page S6  |
| General procedure for the defluorinative synthesis of C4-perfluoroalkenyl<br>2-imidazolones <b>3</b> | Page S7  |
| Scale-up synthesis of product <b>3aa</b>                                                             | Page S7  |
| Mechanistic studies                                                                                  | Page S7  |
| Optimization of reaction conditions                                                                  | Page S11 |
| The X-ray crystal structure of product ( <i>E</i> )- <b>3am</b>                                      | Page S12 |
| Characterization data for products                                                                   | Page S16 |
| References                                                                                           | Page S31 |
| <sup>1</sup> H, <sup>19</sup> F, and <sup>13</sup> C NMR spectra of products                         | Page S32 |

## General information

Unless otherwise stated, all reagents were purchased from commercial suppliers and used without further purification. All reactions were carried out under N<sub>2</sub> atmosphere using undistilled solvent. Melting points were recorded on an electrothermal digital melting point apparatus. <sup>1</sup>H, <sup>19</sup>F, and <sup>13</sup>C NMR spectra were recorded in CDCl<sub>3</sub> on Bruker Avance or Joel 400 MHz spectrometers. NMR splitting patterns are designated as singlet (s), doublet (d), triplet (t), quartet (q), quintet (quint), multiplet (m), doublet of doublets (dd), doublet of triplets (dt), doublet of quartets (dq), triplet of doublets (td), tt (triplet of triplets), quartet of doublets (qd), and quartet of triplets (qt). The chemical shifts ( $\delta$ ) are reported in ppm and coupling constants ( $J$ ) in Hz. High resolution mass spectrometry (HRMS) data were obtained on a Waters LC-TOF mass spectrometer (Xevo G2-XS QTof) using electrospray ionization (ESI) in positive or negative mode. Column chromatography was generally performed on silica gel (300-400 mesh) and reactions were monitored by thin layer chromatography (TLC) using UV light to visualize the course of the reactions.

**Caution: The reaction should be performed under basic conditions; otherwise, attention should be paid to the possible release of HF! After the completion of the defluorination reaction, the etching was observed.**

## General procedure for the synthesis of perfluoroalkyl alkenyl iodides 1

### General procedure A (GPA)<sup>[1]</sup>

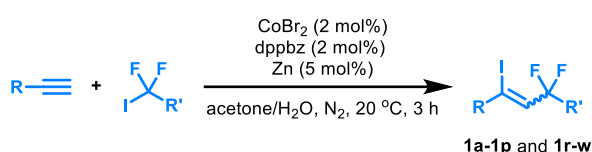

According to Jacobi von Wangelin's reported method, a flask (50 mL), equipped with a magnetic stir bar, was charged with alkyne (5 mmol, 1 equiv.), polyfluoroalkyl iodide (7.5 mmol, 1.5 equiv.), CoBr<sub>2</sub> (21.9 mg, 0.1 mmol, 0.02 equiv.), 1,2-bis(diphenylphosphino)benzene (44.6 mg, 0.1 mmol, 0.02 equiv., dppbz), Zn (16.3 mg, 0.25 mmol, 0.05 equiv.), and acetone/H<sub>2</sub>O (10 mL, 30/1) under N<sub>2</sub> atmosphere. The reaction mixture was stirred at 20 °C under N<sub>2</sub> atmosphere for 3 h. The reaction was then quenched by saturated NH<sub>4</sub>Cl solution (50 mL) and extracted with EtOAc (50 mL x 3). The organic layer was washed with saturated brine twice, dried over MgSO<sub>4</sub>, and concentrated under reduced pressure. The crude product was purified by flash silica gel column chromatography (300-400 mesh) using petroleum ether/ethyl acetate (200/1~20/1) as eluent to afford the pure product 1.

### General procedure B (GPB)<sup>[2]</sup>

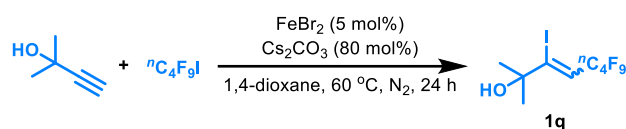

According to Hu's reported method, a flask (50 mL), equipped with a magnetic stir bar, was charged with 2-methylbut-3-yn-2-ol (420.6 mg, 5 mmol, 1 equiv.), perfluorobutyl iodide (2594.4 mg, 7.5 mmol, 1.5 equiv.), FeBr<sub>2</sub> (53.9 mg, 0.25 mmol, 0.05 equiv.), Cs<sub>2</sub>CO<sub>3</sub> (1303.0 mg, 4 mmol, 0.8 equiv.), and anhydrous 1,4-dioxane (20 mL) under N<sub>2</sub> atmosphere. The reaction mixture was stirred at 60 °C under N<sub>2</sub> atmosphere for 24 h. The reaction was then quenched by saturated

NH<sub>4</sub>Cl solution (50 mL) and extracted with EtOAc (50 mL x 3). The organic layer was washed with saturated brine twice, dried over MgSO<sub>4</sub>, and concentrated under reduced pressure. The crude product was purified by flash silica gel column chromatography (300-400 mesh) using petroleum ether/ethyl acetate (100/1~80/1) as eluent to afford the pure product **1q** (1978.2 mg, 46% yield).

### General procedure C (GPC)<sup>[3]</sup>

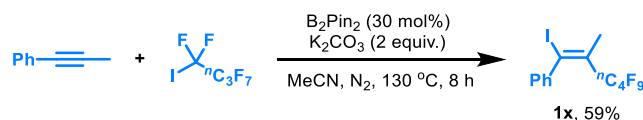

According to Yang's reported method, a flask (50 mL) equipped with a magnetic stir bar was charged with 1-phenyl-1-propyne (223 mg, 2 mmol, 1 equiv.), perfluorobutyl iodide (2.075 g, 6 mmol, 3 equiv.), B<sub>2</sub>Pin<sub>2</sub> (152.4 mg, 0.6 mmol, 0.3 equiv.), K<sub>2</sub>CO<sub>3</sub> (552 mg, 4 mmol, 2 equiv.), and MeCN (4 mL) under N<sub>2</sub> atmosphere. The reaction mixture was stirred at 130 °C under N<sub>2</sub> atmosphere for 8 h. The reaction was then quenched by saturated NH<sub>4</sub>Cl solution (40 mL) and extracted with EtOAc (40 mL x 3). The organic layer was washed with saturated brine twice, dried over MgSO<sub>4</sub>, and concentrated under reduced pressure. The crude product was purified by flash silica gel column chromatography (300-400 mesh) using petroleum ether as eluent to afford the pure product **1x** (546.7 mg, 59%).

### Perfluoroalkyl alkenyl iodides **1** used in the reaction:

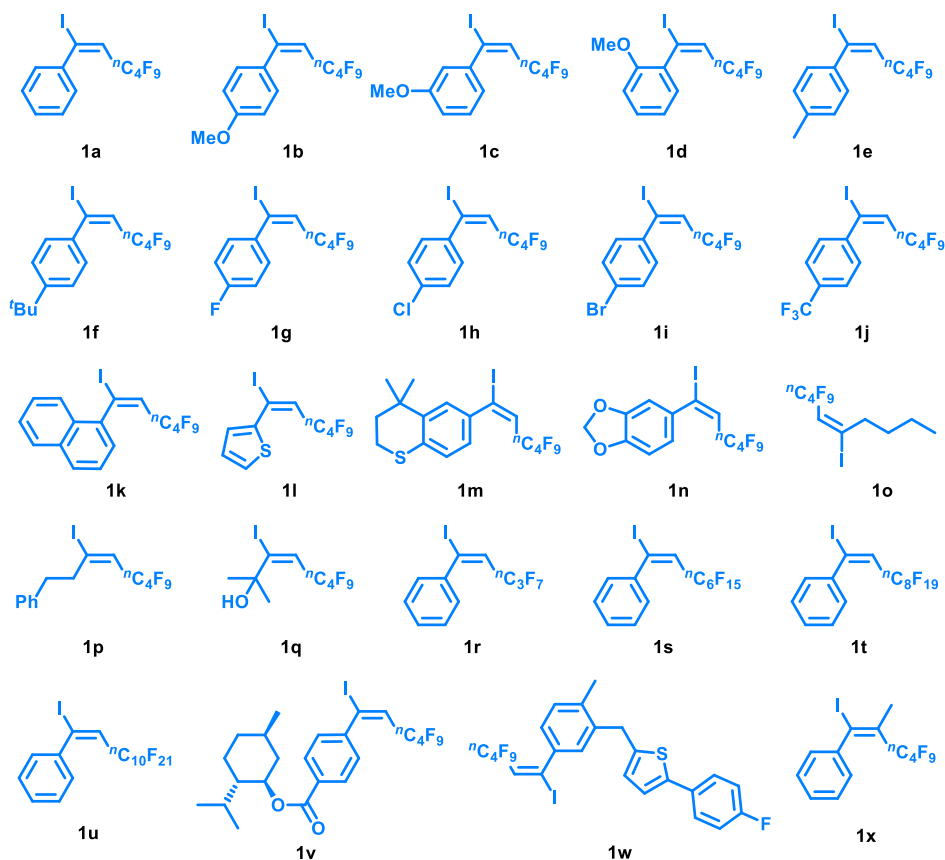

### Representative examples:

**(E)**-(3,3,4,4,5,5,6,6,6-Nonafluoro-1-iodohex-1-en-1-yl)benzene (**1a**)<sup>[1a]</sup>:

Following general procedure GPA.

Yield = 78% (6.99 g, 20 mmol scale). Colorless oil.

Purified by flash column chromatography through silica gel (petroleum ether).

**<sup>1</sup>H NMR (400 MHz, CDCl<sub>3</sub>):**  $\delta$  = 7.36–7.27 (m, 5H), 6.59 (t,  $J$  = 13.6 Hz, 1H) ppm.

**<sup>19</sup>F NMR (376 MHz, CDCl<sub>3</sub>):**  $\delta$  = -80.86 – -81.04 (m, 3F), -105.37 (q,  $J$  = 10.6 Hz, 2F), -123.71 (t,  $J$  = 9.7 Hz, 2F), -125.78 (q,  $J$  = 110.0 Hz, 2F) ppm.

**(*E*)-1-Methyl-4-(3,3,4,4,5,5,6,6,6-nonafluoro-1-iodohex-1-en-1-yl)benzene (1e)<sup>[1b]</sup>:**

Following general procedure GPA.

Yield = 78% (3.60 g, 10 mmol scale). Colorless oil.

Purified by flash column chromatography through silica gel (petroleum ether).

**<sup>1</sup>H NMR (400 MHz, CDCl<sub>3</sub>):**  $\delta$  = 7.22–7.12 (m, 4H), 6.57 (t,  $J$  = 13.5 Hz, 1H), 2.36 (s, 3H) ppm.

**<sup>19</sup>F NMR (376 MHz, CDCl<sub>3</sub>):**  $\delta$  = -80.92 (t,  $J$  = 10.3 Hz, 3F), -105.20 (q,  $J$  = 13.0 Hz, 2F), -123.64 – -123.77 (m, 2F), -125.69 – -125.79 (m, 2F) ppm.

**(*E*)-1-(*tert*-Butyl)-4-(3,3,4,4,5,5,6,6,6-nonafluoro-1-iodohex-1-en-1-yl)benzene (1f)<sup>[1b]</sup>:**

Following general procedure GPA.

Yield = 76% (3.83 g, 10 mmol scale). Yellow oil.

Purified by flash column chromatography through silica gel (petroleum ether).

**<sup>1</sup>H NMR (400 MHz, CDCl<sub>3</sub>):**  $\delta$  = 7.36–7.31 (m, 2H), 7.25–7.21 (m, 2H), 6.57 (t,  $J$  = 13.6 Hz, 1H), 1.32 (s, 9H) ppm.

**<sup>19</sup>F NMR (376 MHz, CDCl<sub>3</sub>):**  $\delta$  = -80.89 (t,  $J$  = 9.9 Hz, 3F), -105.14 (q,  $J$  = 12.4 Hz, 2F), -123.70 – -123.80 (m, 2F), -125.67 – -125.79 (m, 2F) ppm.

**(*E*)-1-Fluoro-4-(3,3,4,4,5,5,6,6,6-nonafluoro-1-iodohex-1-en-1-yl)benzene (1g)<sup>[1b]</sup>:**

Following general procedure GPA.

Yield = 82% (3.83 g, 10 mmol scale). Yellow oil.

Purified by flash column chromatography through silica gel (petroleum ether).

**<sup>1</sup>H NMR (400 MHz, CDCl<sub>3</sub>):**  $\delta$  = 7.31–7.26 (m, 2H), 7.06–6.99 (m, 2H), 6.59 (t,  $J$  = 13.5 Hz, 1H) ppm.

**<sup>19</sup>F NMR (376 MHz, CDCl<sub>3</sub>):**  $\delta$  = -80.92 (t,  $J$  = 9.7 Hz, 3F), -105.37 (q,  $J$  = 12.3 Hz, 2F), -110.74 (dq,  $J$  = 12.0, 6.6 Hz, 1F), -123.73 (q,  $J$  = 9.8 Hz, 2F), -125.85 (tt,  $J$  = 11.2, 6.4 Hz, 2F) ppm.

**(*E*)-1-Chloro-4-(3,3,4,4,5,5,6,6,6-nonafluoro-1-iodohex-1-en-1-yl)benzene (1h)<sup>[1b]</sup>:**

Following general procedure GPA.

Yield = 80% (3.86 g, 10 mmol scale). Yellow oil.

Purified by flash column chromatography through silica gel (petroleum ether).

**<sup>1</sup>H NMR (400 MHz, CDCl<sub>3</sub>):**  $\delta$  = 7.35–7.30 (m, 2H), 7.26–7.20 (m, 2H), 6.60 (t,  $J$  = 13.5 Hz, 1H) ppm.

**<sup>19</sup>F NMR (376 MHz, CDCl<sub>3</sub>):**  $\delta$  = -80.89 (t,  $J$  = 9.9 Hz, 3F), -105.41 (q,  $J$  = 13.0 Hz, 2F), -123.69 (q,  $J$  = 9.7 Hz, 2F), -125.72 – -125.93 (m, 2F) ppm.

**(*E*)-1-(3,3,4,4,5,5,6,6,6-Nonafluoro-1-iodohex-1-en-1-yl)-4-(trifluoromethyl)benzene (1j)<sup>[1b]</sup>:**

Following general procedure GPA.

Yield = 70% (903 mg, 2.5 mmol scale). Yellow oil.

Purified by flash column chromatography through silica gel (petroleum ether).

**<sup>1</sup>H NMR (400 MHz, CDCl<sub>3</sub>):**  $\delta$  = 7.63–7.60 (m, 2H), 7.40 (d,  $J$  = 8.1 Hz, 2H), 6.65 (t,  $J$  = 13.4 Hz, 1H) ppm.

**<sup>19</sup>F NMR (376 MHz, CDCl<sub>3</sub>):**  $\delta$  = -62.83 (s, 3F), -80.91 (t,  $J$  = 9.7 Hz, 3F), -105.54 (q,  $J$  = 12.7 Hz, 2F), -123.66 (q,  $J$  = 9.4 Hz, 2F), -125.74 (dt,  $J$  = 13.4, 6.1 Hz, 2F) ppm.

**(*E*)-1-(3,3,4,4,5,5,6,6,6-Nonafluoro-1-iodohex-1-en-1-yl)naphthalene (1k)<sup>[1b]</sup>:**

Following general procedure GPA.

Yield = 20% (298.9 mg, 3 mmol scale). Yellow oil.

Purified by flash column chromatography through silica gel (petroleum ether).

**<sup>1</sup>H NMR (400 MHz, CDCl<sub>3</sub>):**  $\delta$  = 7.94–7.83 (m, 3H), 7.63–7.59 (m, 1H), 7.55–7.49 (m, 1H), 7.45–7.36 (m, 2H), 6.86 (t,  $J$  = 13.2 Hz, 1H) ppm.

**<sup>19</sup>F NMR (376 MHz, CDCl<sub>3</sub>):**  $\delta$  = -80.89 (s, 3F), -107.42 (t,  $J$  = 15.7 Hz, 2F), -123.67 (s, 2F), -125.77 (s, 2F) ppm.

**(*E*)-4,4-Dimethyl-6-(3,3,4,4,5,5,6,6,6-nonafluoro-1-iodohex-1-en-1-yl)thiochromane (1m)<sup>[1b]</sup>:**

Following general procedure GPA.

Yield = 94% (1.65 g, 3.2 mmol scale). Yellow oil.

Purified by flash column chromatography through silica gel (petroleum ether).

**<sup>1</sup>H NMR (400 MHz, CDCl<sub>3</sub>):**  $\delta$  = 7.28 (s, 1H), 7.06–6.97 (m, 2H), 6.53 (t,  $J$  = 13.6 Hz, 1H), 3.06–3.01 (m, 2H), 1.99–1.92 (m, 2H), 1.31 (s, 6H) ppm.

**<sup>19</sup>F NMR (376 MHz, CDCl<sub>3</sub>):**  $\delta$  = -80.92 (s, 3F), -105.09 (d,  $J$  = 17.8 Hz, 2F), -123.58 (s, 2F), -125.74 (s, 2F) ppm.

**(*E*)-5-(3,3,4,4,5,5,6,6,6-Nonafluoro-1-iodohex-1-en-1-yl)benzo[*d*][1,3]dioxole (1n)<sup>[1b]</sup>:**

Following general procedure GPA.

Yield = 39% (973 mg, 5 mmol scale). Yellow oil.

Purified by flash column chromatography through silica gel (petroleum ether).

**<sup>1</sup>H NMR (400 MHz, CDCl<sub>3</sub>):**  $\delta$  = 6.85–6.70 (m, 3H), 6.53 (t,  $J$  = 13.5 Hz, 1H), 6.00 (s, 2H) ppm.

**<sup>19</sup>F NMR (376 MHz, CDCl<sub>3</sub>):**  $\delta$  = -80.86 (s, 3F), -105.21 (d,  $J$  = 28.2 Hz, 2F), -123.70 (s, 2F), -125.73 (s, 2F) ppm.

**(*E*)-1,1,1,2,2,3,3,4,4-Nonafluoro-6-iododec-5-ene (1o)<sup>[1b]</sup>:**

Following general procedure GPA.

Yield = 52% (2.23 g, 10 mmol scale). Colorless oil.

Purified by flash column chromatography through silica gel (petroleum ether).

**<sup>1</sup>H NMR (400 MHz, CDCl<sub>3</sub>):**  $\delta$  = 6.32 (t,  $J$  = 14.8 Hz, 1H), 2.63 (t,  $J$  = 7.6 Hz, 2H), 1.59–1.53 (m, 2H), 1.36 (q,  $J$  = 7.6 Hz, 2H), 0.93 (t,  $J$  = 7.3 Hz, 3H) ppm.

**<sup>19</sup>F NMR (376 MHz, CDCl<sub>3</sub>):**  $\delta$  = -81.04 (dd,  $J$  = 30.8, 13.8 Hz, 3F), -105.60 (q,  $J$  = 12.6 Hz, 2F), -124.18 (dq,  $J$  = 16.8, 8.9 Hz, 2F), -125.66 – -125.94 (m, 2F) ppm.

**(*E*)-(5,5,6,6,7,7,8,8,8-Nonafluoro-3-iodooct-3-en-1-yl)benzene (1p)<sup>[1b]</sup>:**

Following general procedure GPA.

Yield = 38% (721.3 mg, 4 mmol scale). Yellow oil.

Purified by flash column chromatography through silica gel (petroleum ether).

<sup>1</sup>H NMR (400 MHz, CDCl<sub>3</sub>): δ = 7.34–7.29 (m, 2H), 7.26–7.19 (m, 3H), 6.36 (t, *J* = 14.4 Hz, 1H), 2.99–2.86 (m, 4H) ppm.

<sup>19</sup>F NMR (376 MHz, CDCl<sub>3</sub>): δ = -80.91 (t, *J* = 9.7 Hz, 3F), -105.94 (q, *J* = 13.2 Hz, 2F), -124.10 (q, *J* = 9.1 Hz, 2F), -125.70 (q, *J* = 9.9 Hz, 2F) ppm.

**(*E*)-5,5,6,6,7,7,8,8,8-Nonafluoro-3-iodo-2-methyloct-3-en-2-ol (1q)<sup>[2]</sup>:**

Following general procedure GPB.

Yield = 74% (6.36 g, 20 mmol scale). Colorless oil.

Purified by flash column chromatography through silica gel (petroleum ether).

<sup>1</sup>H NMR (400 MHz, CDCl<sub>3</sub>): δ = 6.91–6.80 (m, 1H), 1.52 (s, 6H) ppm.

<sup>19</sup>F NMR (376 MHz, CDCl<sub>3</sub>): δ = -81.08 (t, *J* = 9.8 Hz, 3F), -108.64 (q, *J* = 13.0 Hz, 2F), -123.97 (q, *J* = 9.6 Hz, 2F), -125.82 (tt, *J* = 10.6, 5.3 Hz, 2F) ppm.

**(*E*)-2-(4-Fluorophenyl)-5-(2-methyl-5-(3,3,4,4,5,5,6,6,6-nonafluoro-1-iodohex-1-en-1-yl)benzyl)thiophene (1w)<sup>[1b]</sup>:**

Following general procedure GPA.

Yield = 69% (905.7 mg, 2 mmol scale). Colorless oil.

Purified by flash column chromatography through silica gel (petroleum ether).

<sup>1</sup>H NMR (400 MHz, CDCl<sub>3</sub>): δ = 7.50–7.45 (m, 2H), 7.18–7.13 (m, 3H), 7.06–7.01 (m, 3H), 6.62 (dt, *J* = 3.5, 1.1 Hz, 1H), 6.60–6.52 (m, 1H), 4.11 (s, 2H), 2.31 (s, 3H) ppm.

<sup>19</sup>F NMR (376 MHz, CDCl<sub>3</sub>): δ = -80.87 (t, *J* = 9.7 Hz, 3F), -105.12 (q, *J* = 12.9 Hz, 2F), -114.96 – -115.06 (m, 1F), -123.56 (q, *J* = 9.3 Hz, 2F), -125.71 (dt, *J* = 13.0, 5.1 Hz, 2F) ppm.

**(*E*)-(3,3,4,4,5,5,6,6,6-Nonafluoro-1-iodo-2-methylhex-1-en-1-yl)benzene (1x)<sup>[3]</sup>:**

Following general procedure GPC.

Yield = 59% (546.7 mg, 2 mmol scale). White solid.

Purified by flash column chromatography through silica gel (petroleum ether).

<sup>1</sup>H NMR (400 MHz, CDCl<sub>3</sub>): δ = 7.31–7.23 (m, 3H), 7.17 (d, *J* = 8.3 Hz, 2H), 2.28 (s, 3H) ppm.

<sup>19</sup>F NMR (376 MHz, CDCl<sub>3</sub>): δ = -80.86 (t, *J* = 10.0 Hz, 3F), -103.30 (t, *J* = 14.4 Hz, 2F), -120.38 (q, *J* = 10.1 Hz, 2F), -126.09 (dt, *J* = 17.3, 10.2 Hz, 2F) ppm.

## General procedure for the synthesis of ureas 2

### General procedure D (GPD)<sup>[4]</sup>

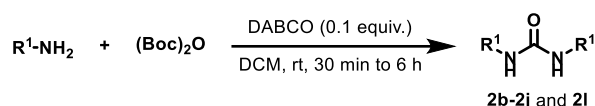

According to Sun's reported method, a flask (50 mL), equipped with a magnetic stir bar, was charged with amine (2 mmol, 2.0 equiv.), DABCO (11.2 mg, 0.1 mmol, 0.1 equiv.), (Boc)<sub>2</sub>O (218 mg, 1.0 mmol, 1.0 equiv.), and CH<sub>2</sub>Cl<sub>2</sub> (10 mL) under air. The reaction mixture was stirred at room temperature under air for 30 min to 6 h. After the completion of the reaction as detected by TLC, the reaction mixture was cooled to 0 °C, *n*-hexane was then added. The resulting solid was collected and further washed with cold water and diethyl ether to afford the corresponding product

2.

### General procedure for the defluorinative synthesis of C4-perfluoroalkenyl 2-imidazolones 3

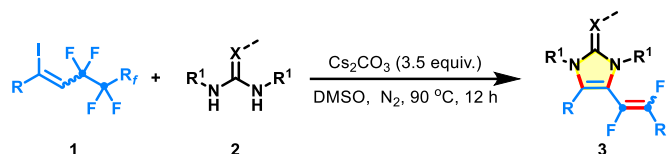

A tube (10 mL), equipped with a magnetic stir bar, was charged with perfluoroalkenyl alkenyl iodide (0.3 mmol, 1 equiv., **1**), urea derivative (0.45 mmol, 1.5 equiv., **2**), Cs<sub>2</sub>CO<sub>3</sub> (342.1 mg, 1.05 mmol, 3.5 equiv.), and DMSO (2 mL) under N<sub>2</sub> atmosphere. The reaction mixture was stirred at 90 °C (oil bath) under N<sub>2</sub> atmosphere for 12 h. The reaction was then quenched by saturated NH<sub>4</sub>Cl solution (20 mL) and extracted with EtOAc (20 mL x 3). The organic layer was washed with saturated brine twice, dried over MgSO<sub>4</sub>, and concentrated under reduced pressure. The crude product was purified by flash silica gel column chromatography (300-400 mesh) using petroleum ether/ethyl acetate (20/1~2/1) as eluent to afford the pure product **3**.

### Scale-up synthesis of product 3aa

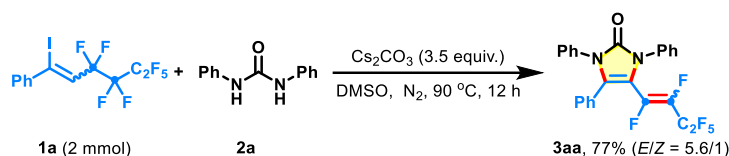

A tube (10 mL), equipped with a magnetic stir bar, was charged with (3,3,4,4,5,5,6,6,6-nonafluoro-1-iodohex-1-en-1-yl)benzene (896.9 mg, 2 mmol, 1 equiv., **1a**), *N,N*-diphenylurea (636.8 mg, 3 mmol, 1.5 equiv., **2a**), Cs<sub>2</sub>CO<sub>3</sub> (2280.0 mg, 7 mmol, 3.5 equiv.), and DMSO (10 mL) under N<sub>2</sub> atmosphere. The reaction mixture was stirred at 90 °C (oil bath) under N<sub>2</sub> atmosphere for 12 h. The reaction was then quenched by saturated NH<sub>4</sub>Cl solution (60 mL) and extracted with EtOAc (60 mL x 3). The organic layer was washed with saturated brine twice, dried over MgSO<sub>4</sub>, and concentrated under reduced pressure. The crude product was purified by flash silica gel column chromatography (300-400 mesh) using petroleum ether/ethyl acetate (10/1) as eluent to afford the pure product **3aa** (756.8 mg, 77% yield).

### Mechanistic studies

#### a) Radical trapping experiment

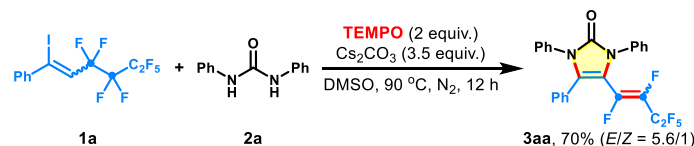

A tube (10 mL), equipped with a magnetic stir bar, was charged with (3,3,4,4,5,5,6,6,6-nonafluoro-1-iodohex-1-en-1-yl)benzene (134.4 mg, 0.3 mmol, 1 equiv., **1a**), *N,N*-diphenylurea (95.5 mg, 0.45 mmol, 1.5 equiv., **2a**), TEMPO (93.7 mg, 0.6 mmol, 2 equiv.), Cs<sub>2</sub>CO<sub>3</sub> (342.1 mg, 1.05 mmol, 3.5 equiv.), and DMSO (2 mL) under N<sub>2</sub> atmosphere. The reaction mixture was stirred at 90 °C (oil bath) under N<sub>2</sub> atmosphere for 12 h. The reaction was then quenched by saturated NH<sub>4</sub>Cl solution (20 mL) and extracted with EtOAc (20 mL x 3). The

organic layer was washed with saturated brine twice, dried over MgSO<sub>4</sub>, and concentrated under reduced pressure. The crude product was purified by flash silica gel column chromatography (300-400 mesh) using petroleum ether/ethyl acetate (10/1) as eluent to afford the pure product **3aa** (102.7 mg, 70% yield).

**A reaction pathway involving open shell intermediates is unlikely.**

#### b) The reactivity of perfluoroalkylated alkene

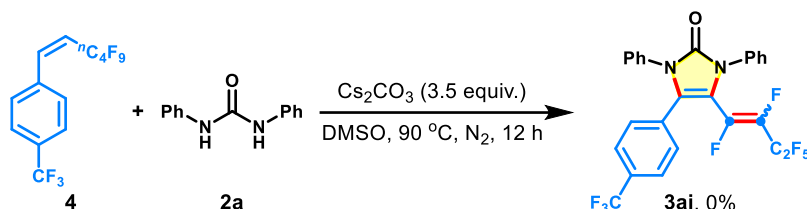

A tube (10 mL), equipped with a magnetic stir bar, was charged with (Z)-1-(3,3,4,4,5,5,6,6,6-nonafluorohex-1-en-1-yl)-4-(trifluoromethyl)benzene (78.0 mg, 0.2 mmol, 1 equiv., **4**), *N,N'*-diphenylurea (63.7 mg, 0.3 mmol, 1.5 equiv., **2a**), Cs<sub>2</sub>CO<sub>3</sub> (228.1 mg, 0.7 mmol, 3.5 equiv.), and DMSO (2 mL) under N<sub>2</sub> atmosphere. The reaction mixture was stirred at 90 °C (oil bath) under N<sub>2</sub> atmosphere for 12 h. No desired product **3aj** was detected.

**This result suggested that the initial reaction might start with an S<sub>N</sub>V-type (nucleophilic vinylic substitution) C(sp<sup>2</sup>)-I bond displacement.**

#### c) The reaction of perfluorobutyl phenyl alkyne **1a'** with urea **2a**

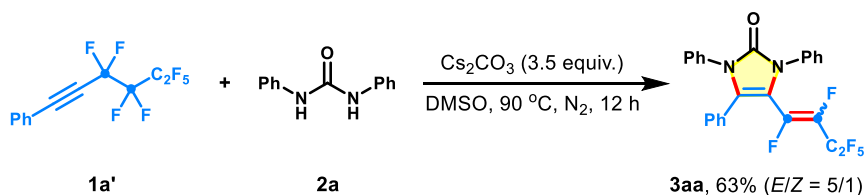

A tube (10 mL), equipped with a magnetic stir bar, was charged with (perfluorohex-1-yn-1-yl)benzene (96.1 mg, 0.3 mmol, 1 equiv., **1a'**), *N,N'*-diphenylurea (95.5 mg, 0.45 mmol, 1.5 equiv., **2a**), Cs<sub>2</sub>CO<sub>3</sub> (342.1 mg, 1.05 mmol, 3.5 equiv.), and DMSO (2 mL) under N<sub>2</sub> atmosphere. The reaction mixture was stirred at 90 °C (oil bath) under N<sub>2</sub> atmosphere for 12 h. The reaction was then quenched by saturated NH<sub>4</sub>Cl solution (20 mL) and extracted with EtOAc (20 mL x 3). The organic layer was washed with saturated brine twice, dried over MgSO<sub>4</sub>, and concentrated under reduced pressure. The crude product was purified by flash silica gel column chromatography (300-400 mesh) using petroleum ether/ethyl acetate (10/1~4/1) as eluent to afford the pure product **3aa** (93.1 mg, 63% yield).

#### d) Dehydroiodination of perfluoroalkyl alkenyl iodide **1a**

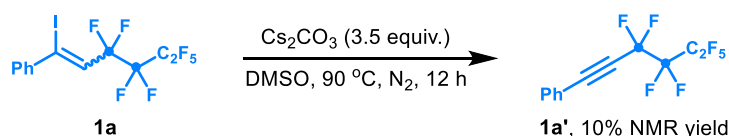

A tube (10 mL), equipped with a magnetic stir bar, was charged with (3,3,4,4,5,5,6,6,6-nonafluoro-1-iodohex-1-en-1-yl)benzene (134.4 mg, 0.3 mmol, 1 equiv., **1a**),



Cs<sub>2</sub>CO<sub>3</sub> (342.1 mg, 1.05 mmol, 3.5 equiv.), and DMSO (2 mL) under N<sub>2</sub> atmosphere. The reaction mixture was stirred at 90 °C (oil bath) under N<sub>2</sub> atmosphere for 12 h. The tube was then cooled to room temperature and the reaction mixture was quenched by saturated NH<sub>4</sub>Cl solution (20 mL) followed by extraction with EtOAc (20 mL x 3). The organic layer was washed with saturated brine twice, dried over MgSO<sub>4</sub>, and concentrated under reduced pressure. The residue was directly analyzed by NMR analysis. ~10% NMR yield of (perfluorohex-1-yn-1-yl)benzene (**1a'**) was determined by <sup>19</sup>F NMR analysis of the residue using 1-fluoro-4-methoxybenzene (0.3 mmol) as an internal standard.

**Although the condensation of presynthesized 1a' with N,N'-diphenylurea 2a readily occurred, the generation of (perfluorohex-1-yn-1-yl)benzene 1a' (~10% NMR yield) in a low yield in the absence of urea 2a under the standard conditions reflected that 1a' might not be a real reaction intermediate.**

### e) Detection of possible intermediate 3aa'

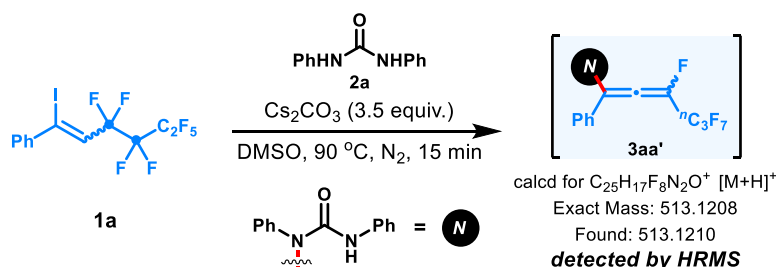

A tube (10 mL), equipped with a magnetic stir bar, was charged with (3,3,4,4,5,5,6,6,6-nonafluoro-1-iodohex-1-en-1-yl)benzene (134.4 mg, 0.3 mmol, 1 equiv., **1a**), *N,N'*-diphenylurea (95.5 mg, 0.45 mmol, 1.5 equiv.), Cs<sub>2</sub>CO<sub>3</sub> (342.1 mg, 1.05 mmol, 3.5 equiv.), and DMSO (2 mL) under N<sub>2</sub> atmosphere. The reaction mixture was stirred at 90 °C (oil bath) under N<sub>2</sub> atmosphere for 15 min. Upon completion of the reaction, the tube was cooled to room temperature, and the mixture was passed through a short pad of Celite and rinsed with MeOH. A sample was taken from the filtrate and was directly analyzed by HRMS.

**HRMS analysis of the reaction mixture suggested the involvement of possible intermediate 3aa'.**

The intermediate **3aa'** was detected by HRMS analysis:

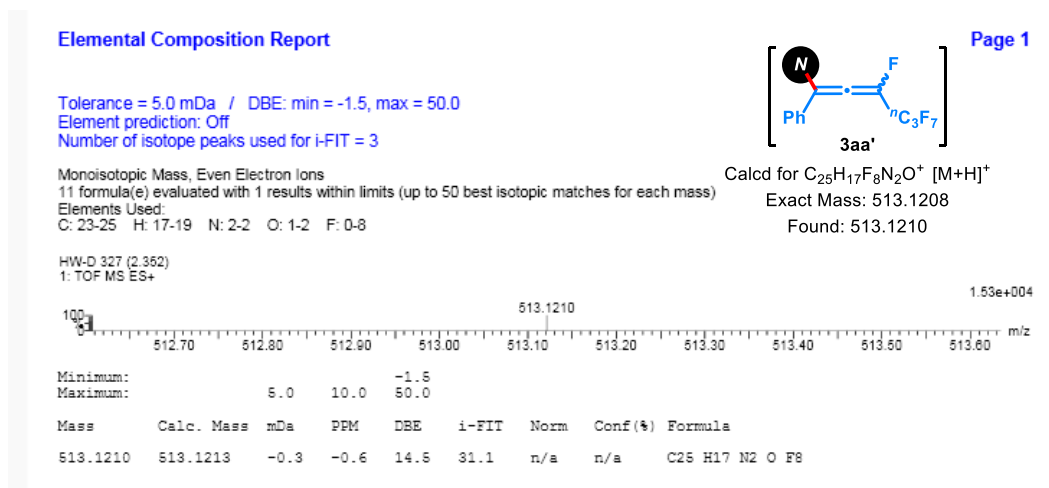

**f) The use of perfluorobutyl alkenyl iodide **1x****

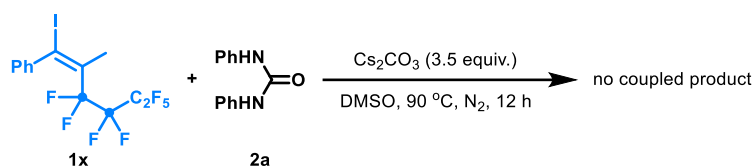

A tube (10 mL) equipped with a magnetic stir bar was charged with (*E*)-(3,3,4,4,5,5,6,6,6-nonafluoro-1-iodo-2-methylhex-1-en-1-yl)benzene (138.6 mg, 0.3 mmol, 1 equiv., **1x**), *N,N'*-diphenylurea (95.5 mg, 0.45 mmol, 1.5 equiv., **2a**),  $\text{Cs}_2\text{CO}_3$  (342.1 mg, 1.05 mmol, 3.5 equiv.), and DMSO (2 mL) under  $\text{N}_2$  atmosphere. The reaction mixture was stirred at  $90\text{ }^\circ\text{C}$  (oil bath) under  $\text{N}_2$  atmosphere for 12 h. No defluorinative coupled product was observed.

**This result indicates the involvement of a fluoroallene intermediate.**

**g) The effect of reaction conditions on the *E/Z* ratio of product **3as****

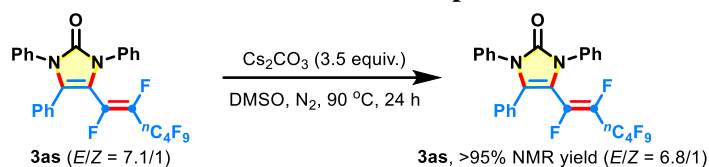

A tube (10 mL) equipped with a magnetic stir bar was charged with 4-(perfluorohex-1-en-1-yl)-1,3,5-triphenyl-1,3-dihydro-2*H*-imidazol-2-one (59.2 mg, 0.1 mmol, 1 equiv., **3as**),  $\text{Cs}_2\text{CO}_3$  (114.0 mg, 0.35 mmol, 3.5 equiv.), and DMSO (2 mL) under  $\text{N}_2$  atmosphere. The reaction mixture was stirred at  $90\text{ }^\circ\text{C}$  (oil bath) under  $\text{N}_2$  atmosphere for 24 h. The tube was then cooled to room temperature and the reaction mixture was quenched by saturated  $\text{NH}_4\text{Cl}$  solution (20 mL) followed by extraction with EtOAc (20 mL x 3). The organic layer was washed with saturated brine twice, dried over  $\text{MgSO}_4$ , and concentrated under reduced pressure. The residue was directly analyzed by NMR analysis. >95% NMR yield of 4-(perfluorohex-1-en-1-yl)-1,3,5-triphenyl-1,3-dihydro-2*H*-imidazol-2-one (**3as**), with a *E/Z* ratio of 6.8/1, was determined through  $^{19}\text{F}$  NMR analysis of the residue, employing 1-fluoro-4-methoxybenzene (0.1 mmol) as the internal standard.

## Optimization of reaction conditions

Table S1. Optimization of reaction conditions<sup>d</sup>

| Entry           | <b>1a/2a</b> | Base (x equiv)                            | Sol.        | Temp. (°C) | Time (h)  | Yields (%) <sup>b</sup>                |           |            |
|-----------------|--------------|-------------------------------------------|-------------|------------|-----------|----------------------------------------|-----------|------------|
|                 |              |                                           |             |            |           | <b>3aa</b> ( <i>E/Z</i> ) <sup>c</sup> | <b>1a</b> | <b>1a'</b> |
| 1               | 1/1.5        | Cs <sub>2</sub> CO <sub>3</sub> (2.5)     | NMP         | 90         | 12        | 14 (5.9/1)                             | 2         | 21         |
| 2               | 1/1.5        | Cs <sub>2</sub> CO <sub>3</sub> (2.5)     | DMSO        | 90         | 12        | 50 (5.7/1)                             | 1         | 5          |
| 3               | 1/1.5        | Cs <sub>2</sub> CO <sub>3</sub> (2.5)     | MeCN        | 80         | 12        | 29 (5.6/1)                             | 3         | 9          |
| 4               | 1/1.5        | Cs <sub>2</sub> CO <sub>3</sub> (2.5)     | DMF         | 90         | 24        | 40 (5.7/1)                             | 3         | 21         |
| 5               | 1/1.5        | Cs <sub>2</sub> CO <sub>3</sub> (2.5)     | DMSO        | 90         | 24        | 44 (5.3/1)                             | 2         | 5          |
| 6               | 1/1.5        | Cs <sub>2</sub> CO <sub>3</sub> (2.5)     | DMSO        | 50         | 12        | 27 (6.6/1)                             | 2         | 31         |
| 7               | 1/1.5        | Cs <sub>2</sub> CO <sub>3</sub> (2.5)     | DMSO        | 70         | 12        | 36 (6.2/1)                             | 2         | 22         |
| 8               | 1/1.5        | Cs <sub>2</sub> CO <sub>3</sub> (2.5)     | DMSO        | 110        | 12        | 51 (3.6/1)                             | 0         | 1          |
| 9               | 1/2          | Cs <sub>2</sub> CO <sub>3</sub> (2.5)     | DMSO        | 90         | 12        | 45 (5.4/1)                             | 0         | 3          |
| 10              | 1/3          | Cs <sub>2</sub> CO <sub>3</sub> (2.5)     | DMSO        | 90         | 12        | 39 (4.6/1)                             | 2         | 3          |
| 11              | 1.5/1        | Cs <sub>2</sub> CO <sub>3</sub> (2.5)     | DMSO        | 90         | 12        | 32 (5.4/1)                             | 9         | 11         |
| 12              | 1/1.5        | Cs <sub>2</sub> CO <sub>3</sub> (2)       | DMSO        | 90         | 12        | 29 (5.4/1)                             | 3         | 5          |
| 13              | 1/1.5        | Cs <sub>2</sub> CO <sub>3</sub> (3)       | DMSO        | 90         | 12        | 59 (5.5/1)                             | 0         | 2          |
| <b>14</b>       | <b>1/1.5</b> | <b>Cs<sub>2</sub>CO<sub>3</sub> (3.5)</b> | <b>DMSO</b> | <b>90</b>  | <b>12</b> | <b>74 (70%)<sup>d</sup> (5.6/1)</b>    | <b>0</b>  | <b>1</b>   |
| 15              | 1/1.5        | Cs <sub>2</sub> CO <sub>3</sub> (4)       | DMSO        | 90         | 12        | 71 (5.5/1)                             | 1         | 0          |
| 16              | 1/1.5        | Cs <sub>2</sub> CO <sub>3</sub> (5)       | DMSO        | 90         | 12        | 68 (5.5/1)                             | 0         | 0          |
| 17              | 1/1.5        | K <sub>2</sub> CO <sub>3</sub> (3.5)      | DMSO        | 90         | 12        | 21 (5/1)                               | 0         | 3          |
| 18              | 1/1.5        | K <sub>3</sub> PO <sub>4</sub> (3.5)      | DMSO        | 90         | 12        | 9 (5/1)                                | 0         | 4          |
| 19              | 1/1.5        | LiOH (3.5)                                | DMSO        | 90         | 12        | 44 (5.8/1)                             | 0         | 5          |
| 20              | 1/1.5        | <sup>t</sup> BuOLi (3.5)                  | DMSO        | 90         | 12        | 43 (5.6/1)                             | 0         | 2          |
| 21              | 1/1.5        | DABCO (3.5)                               | DMSO        | 90         | 12        | trace                                  | trace     | trace      |
| 22              | 1/1.5        | Et <sub>3</sub> N (3.5)                   | DMSO        | 90         | 12        | trace                                  | trace     | trace      |
| 23              | 1/1.2        | Cs <sub>2</sub> CO <sub>3</sub> (3.5)     | DMSO        | 90         | 12        | 60 (5.7/1)                             | 1         | 1          |
| 24              | 1/1          | Cs <sub>2</sub> CO <sub>3</sub> (3.5)     | DMSO        | 90         | 12        | 63 (5.6/1)                             | 1         | 1          |
| 25 <sup>e</sup> | 1/1.5        | Cs <sub>2</sub> CO <sub>3</sub> (3.5)     | DMSO        | 90         | 12        | 56 (5.6/1)                             | 1         | 1          |
| 26 <sup>f</sup> | 1/1.5        | Cs <sub>2</sub> CO <sub>3</sub> (3.5)     | DMSO        | 90         | 12        | 71 (5/1)                               | 1         | 1          |
| 27              | 1/1.5        | Cs <sub>2</sub> CO <sub>3</sub> (3.5)     | DMSO        | 90         | 6         | 68 (5.7/1)                             | 1         | 2          |

<sup>a</sup> Reaction conditions: **1a** (0.3-0.45 mmol), **2a** (0.3-0.9 mmol), and base (0.6-1.5 mmol) in solvent (2 mL) at 50-110 °C under N<sub>2</sub> for 6-24 h. <sup>b</sup> Yields were determined by <sup>19</sup>F NMR analysis with 1-methoxy-4-(trifluoromethyl)benzene (0.3 mmol) as an internal standard. <sup>c</sup> The ratio of *E/Z* isomers was determined through <sup>19</sup>F NMR analysis of the crude products. <sup>d</sup> Isolated yield. <sup>e</sup> DMSO (1 mL) was used. <sup>f</sup> DMSO (3 mL) was used.

## The X-ray crystal structure of product (*E*)-3am

The single crystal was grown from the mixed solution of DCM/EtOAc/DMF (v/v/v = 10/3/1) by slowly evaporating the above solvents at room temperature.

(*E*)-4-(4,4-Dimethylthiochroman-6-yl)-5-(perfluorobut-1-en-1-yl)-1,3-diphenyl-1,3-dihydro-2-*H*-imidazol-2-one [(*E*)-3am; displacement ellipsoids are drawn at the 50% probability levels]:

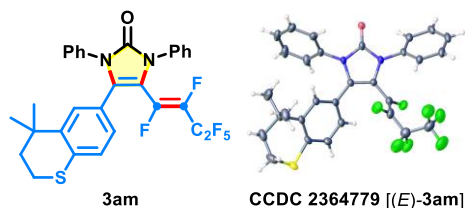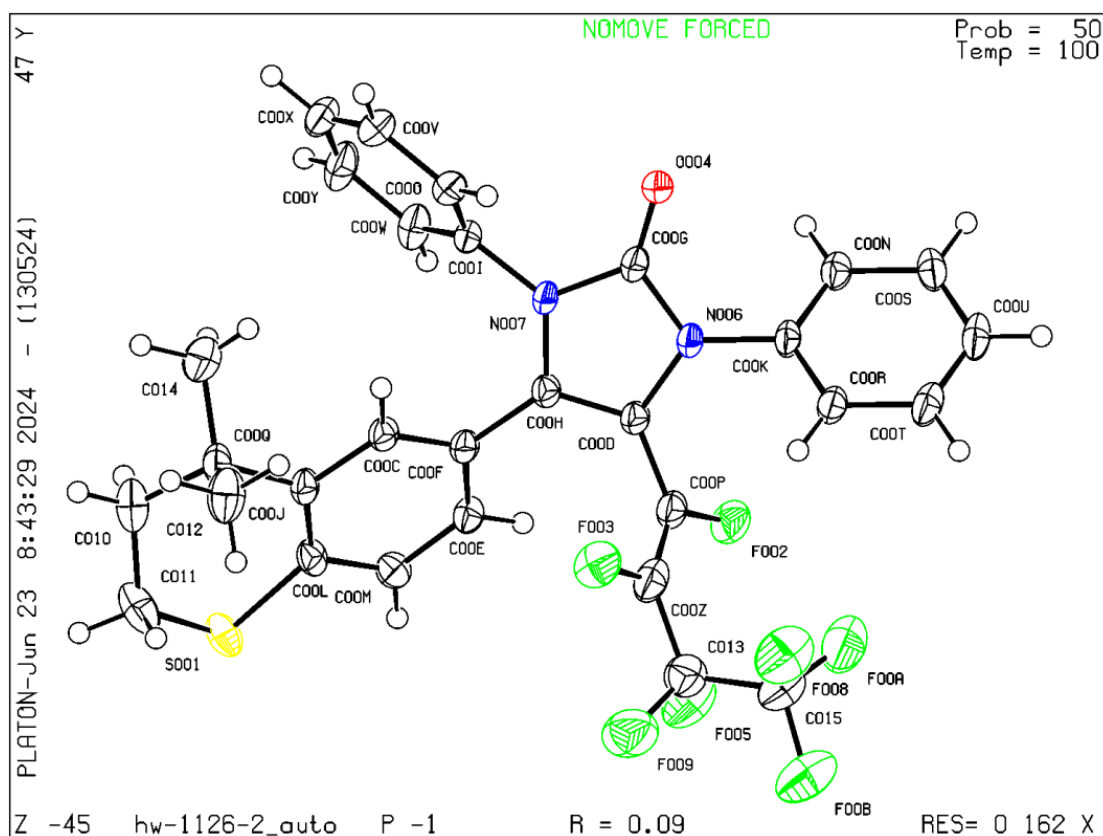

|                             |                     |
|-----------------------------|---------------------|
| _chemical_name_systematic   | P1                  |
| _chemical_formula_moiety    | 'C30 H23 F7 N2 O S' |
| _chemical_formula_sum       | 'C30 H23 F7 N2 O S' |
| _chemical_formula_weight    | 592.56              |
| _space_group_crystal_system | 'triclinic'         |
| _space_group_IT_number      | 2                   |
| _space_group_name_H-M_alt   | 'P -1'              |
| _space_group_name_Hall      | '-P 1'              |
| _cell_length_a              | 6.9880(2)           |
| _cell_length_b              | 12.2498(4)          |

|                                                  |                        |
|--------------------------------------------------|------------------------|
| _cell_length_c                                   | 16.3380(6)             |
| _cell_angle_alpha                                | 105.013(3)             |
| _cell_angle_beta                                 | 90.608(3)              |
| _cell_angle_gamma                                | 93.178(2)              |
| _cell_volume                                     | 1348.29(8)             |
| _cell_formula_units_Z                            | 2                      |
| _cell_measurement_reflns_used                    | 6487                   |
| _cell_measurement_temperature                    | 100.01(10)             |
| _cell_measurement_theta_max                      | 73.9870                |
| _cell_measurement_theta_min                      | 2.7590                 |
| _shelx_estimated_absorpt_T_max                   | 0.844                  |
| _shelx_estimated_absorpt_T_min                   | 0.844                  |
| _exptl_absorpt_coefficient_mu                    | 1.753                  |
| _exptl_absorpt_correction_T_max                  | 1.00000                |
| _exptl_absorpt_correction_T_min                  | 0.69281                |
| _exptl_absorpt_correction_type                   | multi-scan             |
| _exptl_crystal_colour                            | 'clear whiteish white' |
| _exptl_crystal_colour_lustre                     | clear                  |
| _exptl_crystal_colour_modifier                   | whiteish               |
| _exptl_crystal_colour_primary                    | white                  |
| _exptl_crystal_density_diffn                     | 1.460                  |
| _exptl_crystal_description                       | plate                  |
| _exptl_crystal_F_000                             | 608                    |
| _exptl_crystal_size_max                          | 0.1                    |
| _exptl_crystal_size_mid                          | 0.1                    |
| _exptl_crystal_size_min                          | 0.1                    |
| _diffn_reflns_av_R_equivalents                   | 0.0203                 |
| _diffn_reflns_av_unetI/netI                      | 0.0213                 |
| _diffn_reflns_Laue_measured_fraction_full        | 0.998                  |
| _diffn_reflns_Laue_measured_fraction_max         | 0.998                  |
| _diffn_reflns_limit_h_max                        | 5                      |
| _diffn_reflns_limit_h_min                        | -8                     |
| _diffn_reflns_limit_k_max                        | 12                     |
| _diffn_reflns_limit_k_min                        | -14                    |
| _diffn_reflns_limit_l_max                        | 19                     |
| _diffn_reflns_limit_l_min                        | -19                    |
| _diffn_reflns_number                             | 8377                   |
| _diffn_reflns_point_group_measured_fraction_full | 0.998                  |
| _diffn_reflns_point_group_measured_fraction_max  | 0.998                  |
| _diffn_reflns_theta_full                         | 63.998                 |
| _diffn_reflns_theta_max                          | 63.998                 |
| _diffn_reflns_theta_min                          | 2.801                  |
| _diffn_ambient_environment                       | N~2~                   |
| _diffn_ambient_temperature                       | 100.01(10)             |

```

_diffrn_detector          'CCD plate'
_diffrn_detector_area_resol_mean  10.4741
_diffrn_detector_type     Atlas
_diffrn_measured_fraction_theta_full  0.998
_diffrn_measured_fraction_theta_max  0.998

```

List of Runs (angles in degrees, time in seconds):

| #  | Type | Start   | End    | Width | t~exp~ | \w | \q     | \k      | \f      | Frames |
|----|------|---------|--------|-------|--------|----|--------|---------|---------|--------|
| 1  | \w   | -78.00  | 28.00  | 1.00  | 1.00   | -- | -41.73 | 19.00   | 120.00  | 106    |
| 2  | \w   | -65.00  | -10.00 | 1.00  | 1.00   | -- | -41.73 | 125.00  | 90.00   | 55     |
| 3  | \w   | -114.00 | -29.00 | 1.00  | 1.00   | -- | -41.73 | -38.00  | -60.00  | 85     |
| 4  | \w   | 25.00   | 94.00  | 1.00  | 1.00   | -- | 41.73  | -125.00 | -90.00  | 69     |
| 5  | \w   | 55.00   | 84.00  | 1.00  | 1.00   | -- | 41.73  | -129.00 | 80.00   | 29     |
| 6  | \w   | 25.00   | 100.00 | 1.00  | 1.75   | -- | 106.33 | -94.00  | 120.00  | 75     |
| 7  | \w   | 116.00  | 172.00 | 1.00  | 1.75   | -- | 106.33 | 30.00   | -180.00 | 56     |
| 8  | \w   | 107.00  | 172.00 | 1.00  | 1.75   | -- | 106.33 | 125.00  | -180.00 | 65     |
| 9  | \w   | 45.00   | 88.00  | 1.00  | 1.75   | -- | 106.33 | -125.00 | 0.00    | 43     |
| 10 | \w   | 111.00  | 151.00 | 1.00  | 1.75   | -- | 106.33 | 125.00  | 120.00  | 40     |
| 11 | \w   | 85.00   | 178.00 | 1.00  | 1.75   | -- | 106.33 | 30.00   | -120.00 | 93     |
| 12 | \w   | 73.00   | 112.00 | 1.00  | 1.75   | -- | 106.33 | -125.00 | -30.00  | 39     |
| 13 | \w   | 52.00   | 117.00 | 1.00  | 1.75   | -- | 106.33 | -125.00 | 60.00   | 65     |
| 14 | \w   | 26.00   | 64.00  | 1.00  | 1.75   | -- | 106.33 | -94.00  | 150.00  | 38     |
| 15 | \w   | 84.00   | 109.00 | 1.00  | 1.75   | -- | 106.33 | -94.00  | 150.00  | 25     |
| 16 | \w   | 36.00   | 131.00 | 1.00  | 1.75   | -- | 106.33 | -61.00  | 150.00  | 95     |
| 17 | \w   | 120.00  | 178.00 | 1.00  | 1.75   | -- | 106.33 | 30.00   | 120.00  | 58     |
| 18 | \w   | 142.00  | 178.00 | 1.00  | 1.75   | -- | 106.33 | 45.00   | -60.00  | 36     |
| 19 | \w   | 84.00   | 130.00 | 1.00  | 1.75   | -- | 106.33 | 45.00   | -60.00  | 46     |

```

_diffrn_measurement_device      'four-circle diffractometer'
_diffrn_measurement_device_type  'SuperNova, Dual, Cu at home/near, Atlas'
_diffrn_measurement_method      '\w scans'
_diffrn_orient_matrix_type
'CrysAlisPro convention (1999,Acta A55,543-557)'
_diffrn_orient_matrix_UB_11      0.0060155000
_diffrn_orient_matrix_UB_12      -0.1271883000
_diffrn_orient_matrix_UB_13      -0.0439701000
_diffrn_orient_matrix_UB_21      0.0002845000
_diffrn_orient_matrix_UB_22      -0.0266390000
_diffrn_orient_matrix_UB_23      0.0871246000
_diffrn_orient_matrix_UB_31      -0.2207892000
_diffrn_orient_matrix_UB_32      -0.0113626000
_diffrn_orient_matrix_UB_33      -0.0036165000
_diffrn_radiation_monochromator  mirror

```

|                                     |                                                                     |
|-------------------------------------|---------------------------------------------------------------------|
| _diffn_radiation_probe              | x-ray                                                               |
| _diffn_radiation_type               | 'Cu K\ a'                                                           |
| _diffn_radiation_wavelength         | 1.54184                                                             |
| _diffn_source                       | 'micro-focus sealed X-ray tube'                                     |
| _diffn_source_type                  | 'SuperNova (Cu) X-ray Source'                                       |
| _reflns_Friedel_coverage            | 0.000                                                               |
| _reflns_number_gt                   | 4161                                                                |
| _reflns_number_total                | 4452                                                                |
| _reflns_odcompleteness_completeness | 99.79                                                               |
| _reflns_odcompleteness_iscentric    | 1                                                                   |
| _reflns_odcompleteness_theta        | 66.97                                                               |
| _reflns_threshold_expression        | 'I > 2\ s(I)'                                                       |
| _computing_cell_refinement          | 'CrysAlisPro 1.171.42.94a (Rigaku OD, 2023)'                        |
| _computing_data_collection          | 'CrysAlisPro 1.171.42.94a (Rigaku OD, 2023)'                        |
| _computing_data_reduction           | 'CrysAlisPro 1.171.42.94a (Rigaku OD, 2023)'                        |
| _computing_molecular_graphics       | 'Olex2 1.3 (Dolomanov et al., 2009)'                                |
| _computing_publication_material     | 'Olex2 1.3 (Dolomanov et al., 2009)'                                |
| _computing_structure_refinement     | 'SHELXL 2018/3 (Sheldrick, 2015)'                                   |
| _computing_structure_solution       | 'SHELXT 2018/2 (Sheldrick, 2018)'                                   |
| _refine_diff_density_max            | 1.359                                                               |
| _refine_diff_density_min            | -0.667                                                              |
| _refine_diff_density_rms            | 0.113                                                               |
| _refine_ls_extinction_method        | none                                                                |
| _refine_ls_goodness_of_fit_ref      | 1.026                                                               |
| _refine_ls_hydrogen_treatment       | constr                                                              |
| _refine_ls_matrix_type              | full                                                                |
| _refine_ls_number_parameters        | 372                                                                 |
| _refine_ls_number_reflns            | 4452                                                                |
| _refine_ls_number_restraints        | 0                                                                   |
| _refine_ls_R_factor_all             | 0.0916                                                              |
| _refine_ls_R_factor_gt              | 0.0877                                                              |
| _refine_ls_restrained_S_all         | 1.026                                                               |
| _refine_ls_shift/su_max             | 0.000                                                               |
| _refine_ls_shift/su_mean            | 0.000                                                               |
| _refine_ls_structure_factor_coef    | Fsqd                                                                |
| _refine_ls_weighting_details        | 'w=1/[\ s^2^(Fo^2^)+(0.1548P)^2^+4.3423P] where P=(Fo^2^+2Fc^2^)/3' |
| _refine_ls_weighting_scheme         | calc                                                                |
| _refine_ls_wR_factor_gt             | 0.2514                                                              |
| _refine_ls_wR_factor_ref            | 0.2549                                                              |

### Characterization data for products

Note: All  $^{19}\text{F}$  NMR analyses of the *E/Z* isomer ratio were based on two characteristic fluorine peaks within the range of -119 to -121 ppm.

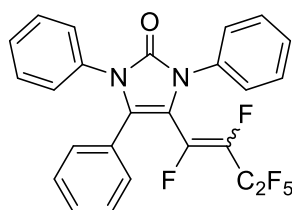

#### **4-(Perfluorobut-1-en-1-yl)-1,3,5-triphenyl-1,3-dihydro-2H-imidazol-2-one (3aa):**

Yield = 70% (103.5 mg, *E/Z* = 5.3/1). Yellow oil.

Purified by flash column chromatography through silica gel (petroleum ether/ethyl acetate, 10/1).

$^1\text{H}$  NMR (400 MHz,  $\text{CDCl}_3$ ) of *E*-isomer:  $\delta$  = 7.50 (d,  $J$  = 4.4 Hz, 4H), 7.42–7.38 (m, 1H), 7.35–7.23 (m, 8H), 7.21–7.16 (m, 2H) ppm.

$^{19}\text{F}$  NMR (376 MHz,  $\text{CDCl}_3$ ) of *E*-isomer:  $\delta$  = -84.36 (t,  $J$  = 3.4 Hz, 3F), -120.64 – -120.80 (m, 2F), -127.18 – -127.77 (m, 1F), -156.04 – -156.58 (m, 1F) ppm; *Z*-isomer:  $\delta$  = -83.22 (d,  $J$  = 9.0 Hz, 3F), -99.96 (d,  $J$  = 22.6 Hz, 1F), -119.66 (d,  $J$  = 15.0 Hz, 2F), -140.72 – -140.93 (m, 1F) ppm.

$^{13}\text{C}$  NMR (100 MHz,  $\text{CDCl}_3$ ) of *E*-isomer:  $\delta$  = 151.4, 145.0 (dd,  $J_{\text{C-F}}$  = 257.0, 42.5 Hz), 143.9–137.9 (m, 1C), 129.34, 129.28, 128.9, 128.73, 128.71, 128.6, 128.2, 127.8, 127.3, 126.7, 126.6, 126.3, 125.8, 107.5 (dd,  $J_{\text{C-F}}$  = 27.3, 5.1 Hz) ppm, carbons corresponding to the  $\text{C}_2\text{F}_5$  group cannot be identified due to C-F coupling.

HRMS (*m/z*): calcd for  $\text{C}_{25}\text{H}_{16}\text{F}_7\text{N}_2\text{O}$  [ $\text{M}+\text{H}$ ] $^+$  493.1145, found: 493.1148.

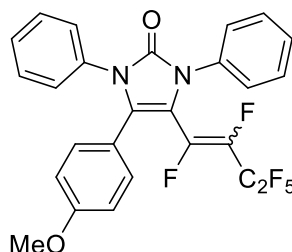

#### **4-(4-Methoxyphenyl)-5-(perfluorobut-1-en-1-yl)-1,3-diphenyl-1,3-dihydro-2H-imidazol-2-one (3ab):**

Yield = 55% (86.8 mg, *E/Z* = 6.9/1). Yellow solid.

Purified by flash column chromatography through silica gel (petroleum ether/ethyl acetate, 10/1).

$^1\text{H}$  NMR (400 MHz,  $\text{CDCl}_3$ ) of *E*-isomer:  $\delta$  = 7.50–7.46 (m, 4H), 7.42–7.36 (m, 1H), 7.34 (dt,  $J$  = 6.5, 1.4 Hz, 2H), 7.32–7.28 (m, 1H), 7.26–7.22 (m, 2H), 7.12–7.06 (m, 2H), 6.83–6.79 (m, 2H), 3.76 (s, 3H) ppm.

$^{19}\text{F}$  NMR (376 MHz,  $\text{CDCl}_3$ ) of *E*-isomer:  $\delta$  = -84.35 (t,  $J$  = 4.4 Hz, 3F), -120.58 (dd,  $J$  = 24.8, 14.1 Hz, 2F), -126.97 – -127.56 (m, 1F), -156.27 – -156.80 (m, 1F) ppm; *Z*-isomer:  $\delta$  = -83.88 (s, 3F), -95.53 (d,  $J$  = 22.3 Hz, 1F), -119.54 (dd,  $J$  = 31.3, 17.4 Hz, 2F), -141.06 – -141.23 (m, 1F) ppm.

$^{13}\text{C}$  NMR (100 MHz,  $\text{CDCl}_3$ ) of *E*-isomer:  $\delta$  = 160.3, 151.5, 145.2 (dd,  $J_{\text{C-F}}$  = 258.6, 42.4 Hz), 145.8–137.8 (m, 1C), 134.3, 134.2, 130.2, 129.3, 129.0, 128.1, 127.8, 127.4, 126.3, 125.8, 118.8, 114.1, 107.0 (dd,  $J_{\text{C-F}}$  = 22.3, 5.1 Hz), 55.1 ppm, carbons corresponding to the  $\text{C}_2\text{F}_5$  group cannot



be identified due to C-F coupling.

**HRMS (m/z):** calcd for C<sub>26</sub>H<sub>18</sub>F<sub>7</sub>N<sub>2</sub>O<sub>2</sub> [M+H]<sup>+</sup> 523.1251, found: 523.1255.

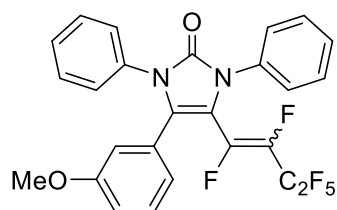

**4-(3-Methoxyphenyl)-5-(perfluorobut-1-en-1-yl)-1,3-diphenyl-1,3-dihydro-2H-imidazol-2-one (3ac):**

Yield = 56% (87.7 mg, *E/Z* = 4.7/1). Yellow solid.

Purified by flash column chromatography through silica gel (petroleum ether/ethyl acetate, 10/1).

**<sup>1</sup>H NMR (400 MHz, CDCl<sub>3</sub>) of *E*-isomer:**  $\delta$  = 7.50–7.45 (m, 5H), 7.28–7.25 (m, 2H), 7.23–7.18 (m, 5H), 6.93 (t, *J* = 7.5 Hz, 1H), 6.75 (d, *J* = 8.4 Hz, 1H), 3.42 (s, 3H) ppm.

**<sup>19</sup>F NMR (376 MHz, CDCl<sub>3</sub>) of *E*-isomer:**  $\delta$  = -84.40 (t, *J* = 4.2 Hz, 3F), -120.60 – -120.77 (m, 2F), -126.73 – -127.36 (m, 1F), -155.76 – -156.27 (m, 1F) ppm; ***Z*-isomer:**  $\delta$  = -83.19 – -83.26 (m, 3F), -95.89 (d, *J* = 20.6 Hz, 1F), -119.55 – -119.63 (m, 2F), -140.64 – -140.85 (m, 1F) ppm.

**<sup>13</sup>C NMR (100 MHz, CDCl<sub>3</sub>) of *E*-isomer:**  $\delta$  = 159.5, 151.4, 145.0 (dd, *J*<sub>C-F</sub> = 258.6, 42.4 Hz), 140.1–138.1 (m, 1C), 134.2, 134.1, 129.6, 129.3, 129.0, 128.4, 128.2, 127.9, 127.3, 126.3, 125.9, 121.1, 115.6, 113.8, 107.5 (dd, *J*<sub>C-F</sub> = 22.2, 4.1 Hz), 55.0 ppm, carbons corresponding to the C<sub>2</sub>F<sub>5</sub> group cannot be identified due to C-F coupling.

**HRMS (m/z):** calcd for C<sub>26</sub>H<sub>18</sub>F<sub>7</sub>N<sub>2</sub>O<sub>2</sub> [M+H]<sup>+</sup> 523.1251, found: 523.1249.

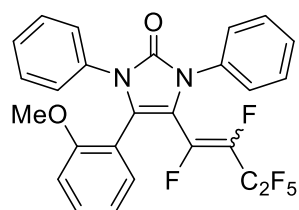

**4-(2-Methoxyphenyl)-5-(perfluorobut-1-en-1-yl)-1,3-diphenyl-1,3-dihydro-2H-imidazol-2-one (3ad):**

Yield = 34% (53.3 mg, *E/Z* = 4.8/1). Yellow solid.

Purified by flash column chromatography through silica gel (petroleum ether/ethyl acetate, 10/1).

**<sup>1</sup>H NMR (400 MHz, CDCl<sub>3</sub>) of *E*-isomer:**  $\delta$  = 7.50–7.45 (m, 5H), 7.28–7.25 (m, 2H), 7.20 (dddd, *J* = 10.4, 6.1, 2.1, 1.1 Hz, 5H), 6.93 (td, *J* = 7.5, 1.0 Hz, 1H), 6.75 (dd, *J* = 8.4, 1.0 Hz, 1H), 3.42 (s, 3H) ppm.

**<sup>19</sup>F NMR (376 MHz, CDCl<sub>3</sub>) of *E*-isomer:**  $\delta$  = -84.40 (t, *J* = 4.2 Hz, 3F), -120.60 – -120.77 (m, 2F), -126.73 – -127.36 (m, 1F), -155.76 – -156.27 (m, 1F) ppm; ***Z*-isomer:**  $\delta$  = -83.19 – -83.26 (m, 3F), -95.89 (d, 1F), -119.55 – -119.63 (m, 2F), -140.64 – -140.85 (m, 1F) ppm.

**<sup>13</sup>C NMR (100 MHz, CDCl<sub>3</sub>) of *E*-isomer:**  $\delta$  = 156.9, 151.4, 145.3 (dd, *J*<sub>C-F</sub> = 256.5, 42.4 Hz), 141.4–137.3 (m, 1C), 134.8, 134.6, 131.6, 131.0, 129.3, 128.5, 128.2, 127.9, 127.5, 126.4, 125.7, 120.7, 115.8, 111.1, 107.8 (dd, *J*<sub>C-F</sub> = 26.3, 5.1 Hz), 54.9 ppm, carbons corresponding to the C<sub>2</sub>F<sub>5</sub> group cannot be identified due to C-F coupling.

**HRMS (m/z):** calcd for C<sub>26</sub>H<sub>18</sub>F<sub>7</sub>N<sub>2</sub>O<sub>2</sub> [M+H]<sup>+</sup> 523.1251, found: 523.1254.

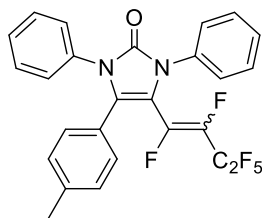

**4-(Perfluorobut-1-en-1-yl)-1,3-diphenyl-5-(p-tolyl)-1,3-dihydro-2H-imidazol-2-one (3ae):**

Yield = 66% (100.7 mg, *E/Z* = 5.6/1). Yellow solid.

Purified by flash column chromatography through silica gel (petroleum ether/ethyl acetate, 10/1).

**<sup>1</sup>H NMR (400 MHz, CDCl<sub>3</sub>) of *E*-isomer:** δ = 7.49–7.45 (m, 4H), 7.38 (ddd, *J* = 6.4, 5.4, 2.5 Hz, 1H), 7.34–7.30 (m, 2H), 7.30–7.27 (m, 1H), 7.24–7.20 (m, 2H), 7.06 (q, *J* = 8.2 Hz, 4H), 2.30 (s, 3H) ppm.

**<sup>19</sup>F NMR (376 MHz, CDCl<sub>3</sub>) of *E*-isomer:** δ = -84.36 (t, *J* = 4.2 Hz, 3F), -120.58 – -120.73 (m, 2F), -126.93 – -127.51 (m, 1F), -156.17 – -156.67 (m, 1F) ppm; ***Z*-isomer:** δ = -83.22 (d, *J* = 8.8 Hz, 3F), -95.67 (d, *J* = 20.8 Hz, 1F), -119.47 – -119.66 (m, 2F), -141.07 (ddt, *J* = 30.0, 17.4, 8.7 Hz, 1F) ppm.

**<sup>13</sup>C NMR (100 MHz, CDCl<sub>3</sub>) of *E*-isomer:** δ = 151.5, 144.7 (dd, *J*<sub>C-F</sub> = 256.5, 42.4 Hz), 139.6, 138.9–137.9 (m, 1C), 134.3, 134.2, 129.4, 129.3, 129.0, 128.6, 128.3, 128.1, 127.8, 127.4, 125.9, 123.7 (d, *J*<sub>C-F</sub> = 2.2Hz), 107.2 (dd, *J*<sub>C-F</sub> = 26.3, 5.1Hz), 21.2 ppm, carbons corresponding to the C<sub>2</sub>F<sub>5</sub> group cannot be identified due to C-F coupling.

**HRMS (m/z):** calcd for C<sub>26</sub>H<sub>18</sub>F<sub>7</sub>N<sub>2</sub>O [M+H]<sup>+</sup> 507.1302, found: 507.1302.

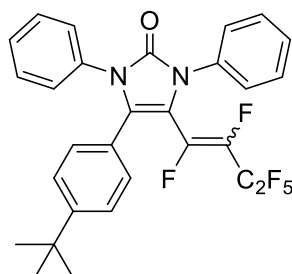

**4-(4-(tert-Butyl)phenyl)-5-(perfluorobut-1-en-1-yl)-1,3-diphenyl-1,3-dihydro-2H-imidazol-2-one (3af):**

Yield = 62% (101.6 mg, *E/Z* = 6.1/1). Yellow solid.

Purified by flash column chromatography through silica gel (petroleum ether/ethyl acetate, 10/1).

**<sup>1</sup>H NMR (400 MHz, CDCl<sub>3</sub>) of *E*-isomer:** δ = 7.49–7.46 (m, 5H), 7.34–7.28 (m, 5H), 7.24 (dt, *J* = 7.0, 1.5 Hz, 2H), 7.10–7.05 (m, 2H), 1.27 (s, 9H) ppm.

**<sup>19</sup>F NMR (376 MHz, CDCl<sub>3</sub>) of *E*-isomer:** δ = -84.36 (t, *J* = 4.3 Hz, 3F), -120.57 – -120.76 (m, 2F), -126.71 – -127.32 (m, 1F), -156.26 (ddtd, *J* = 149.1, 13.4, 8.8, 4.3 Hz, 1F) ppm; ***Z*-isomer:** δ = -83.24 (d, *J* = 8.9 Hz, 3F), -95.82 (d, *J* = 22.2 Hz, 1F), -119.69 (dd, *J* = 76.7, 17.7 Hz, 2F), -141.18 (ddt, *J* = 29.8, 17.7, 8.9 Hz, 1F) ppm.

**<sup>13</sup>C NMR (100 MHz, CDCl<sub>3</sub>) of *E*-isomer:** δ = 152.7, 151.5, 145.2 (dd, *J*<sub>C-F</sub> = 256.5, 42.4 Hz), 141.1–138.6 (m, 1C), 134.3, 134.2, 129.3, 128.9, 128.4, 128.1, 127.8, 127.4, 126.3, 125.9, 125.6, 123.7 (d, *J*<sub>C-F</sub> = 3.4 Hz), 107.3 ((dd, *J*<sub>C-F</sub> = 28.3, 5.1 Hz), 34.7, 31.0 ppm, carbons corresponding to

the C<sub>2</sub>F<sub>5</sub> group cannot be identified due to C-F coupling.

**HRMS (m/z):** calcd for C<sub>29</sub>H<sub>24</sub>F<sub>7</sub>N<sub>2</sub>O [M+H]<sup>+</sup> 549.1771, found: 549.1770.

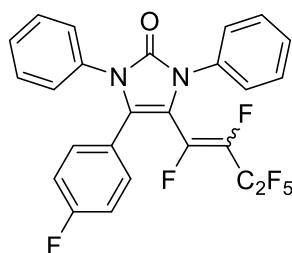

**4-(4-Fluorophenyl)-5-(perfluorobut-1-en-1-yl)-1,3-diphenyl-1,3-dihydro-2H-imidazol-2-one (3ag):**

Yield = 35% (53.0 mg, *E/Z* = 4.3/1). Yellow oil.

Purified by flash column chromatography through silica gel (petroleum ether/ethyl acetate, 10/1).

**<sup>1</sup>H NMR (400 MHz, CDCl<sub>3</sub>) of *E*-isomer:**  $\delta$  = 7.53–7.41 (m, 5H), 7.37–7.31 (m, 3H), 7.23–7.20 (m, 2H), 7.15 (ddt, *J* = 8.0, 5.1, 2.5 Hz, 2H), 7.04–6.96 (m, 2H) ppm.

**<sup>19</sup>F NMR (376 MHz, CDCl<sub>3</sub>) of *E*-isomer:**  $\delta$  = -84.37 (q, *J* = 4.4 Hz, 3F), -110.05 – -110.14 (m, 1F), -120.62 – -120.76 (m, 2F), -127.33 – -127.93 (m, 1F), -155.90 – -156.47 (m, 1F) ppm; ***Z*-isomer:**  $\delta$  = -83.23 (d, *J* = 8.8 Hz, 3F), -96.20 (d, *J* = 20.8 Hz, 1F), -110.17 (t, *J* = 5.2 Hz, 1F), -119.60 (d, *J* = 17.5 Hz, 2F), -140.26 – -140.53 (m, 1F) ppm.

**<sup>13</sup>C NMR (100 MHz, CDCl<sub>3</sub>) of *E*-isomer:**  $\delta$  = 163.1 (d, *J*<sub>C-F</sub> = 251.5 Hz), 151.4, 145.7 (dd, *J*<sub>C-F</sub> = 256.5, 42.4 Hz), 141.1–138.6 (m, 1C), 134.2, 133.9, 130.9 (d, *J*<sub>C-F</sub> = 8.2 Hz), 129.4, 129.1, 128.3, 128.1, 127.4, 126.3, 125.9, 122.9, 116.1 (d, *J*<sub>C-F</sub> = 22.2 Hz), 107.9 (dd, *J*<sub>C-F</sub> = 22.2, 7.2 Hz) ppm, carbons corresponding to the C<sub>2</sub>F<sub>5</sub> group cannot be identified due to C-F coupling.

**HRMS (m/z):** calcd for C<sub>25</sub>H<sub>15</sub>F<sub>8</sub>N<sub>2</sub>O [M+H]<sup>+</sup> 511.1051, found: 511.1050.

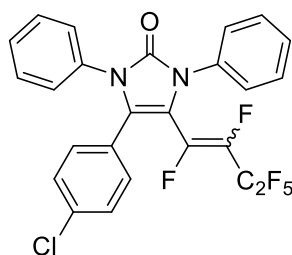

**4-(4-Chlorophenyl)-5-(perfluorobut-1-en-1-yl)-1,3-diphenyl-1,3-dihydro-2H-imidazol-2-one (3ah):**

Yield = 52% (82.7 mg, *E/Z* = 4.6/1). Yellow solid.

Purified by flash column chromatography through silica gel (petroleum ether/ethyl acetate, 10/1).

**<sup>1</sup>H NMR (400 MHz, CDCl<sub>3</sub>) of *E*-isomer:**  $\delta$  = 7.51–7.42 (m, 5H), 7.37–7.34 (m, 2H), 7.30–7.26 (m, 3H), 7.24–7.20 (m, 2H), 7.12–7.08 (m, 2H) ppm.

**<sup>19</sup>F NMR (376 MHz, CDCl<sub>3</sub>) of *E*-isomer:**  $\delta$  = -84.33 (d, *J* = 3.7 Hz, 3F), -120.62 – -120.76 (m, 2F), -127.20 – -127.79 (m, 1F), -155.51 – -156.29 (m, 1F) ppm; ***Z*-isomer:**  $\delta$  = -83.22 (d, *J* = 9.0 Hz, 3F), -96.20 (d, *J* = 19.4 Hz, 1F), -119.59 (dd, *J* = 17.9, 7.7 Hz, 2F), -140.04 – -140.26 (m, 1F) ppm.

**<sup>13</sup>C NMR (100 MHz, CDCl<sub>3</sub>) of *E*-isomer:**  $\delta$  = 151.4, 144.5 (dd, *J*<sub>C-F</sub> = 257.6, 44.5 Hz),

141.0–137.7 (m, 1C), 135.7, 134.1, 133.8, 130.0, 129.4, 129.2, 129.1, 128.4, 128.1, 127.3, 126.3, 125.9, 125.2 (d,  $J_{C-F}$  = 3.4 Hz), 108.0 (dd,  $J_{C-F}$  = 27.6, 5.1 Hz) ppm, carbons corresponding to the  $C_2F_5$  group cannot be identified due to C-F coupling.

**HRMS (m/z):** calcd for  $C_{25}H_{15}ClF_7N_2O$   $[M+H]^+$  527.0756, found: 527.0756.

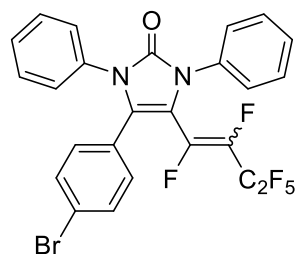

**4-(4-Bromophenyl)-5-(perfluorobut-1-en-1-yl)-1,3-diphenyl-1,3-dihydro-2H-imidazol-2-one (3ai):**

Yield = 40% (68.4 mg,  $E/Z$  = 4.6/1). Yellow oil.

Purified by flash column chromatography through silica gel (petroleum ether/ethyl acetate, 10/1).

**$^1H$  NMR (400 MHz,  $CDCl_3$ ) of *E*-isomer:**  $\delta$  = 7.51–7.41 (m, 8H), 7.38–7.34 (m, 2H), 7.23–7.19 (m, 2H), 7.05–7.01 (m, 2H) ppm.

**$^{19}F$  NMR (376 MHz,  $CDCl_3$ ) of *E*-isomer:**  $\delta$  = -84.31 (t,  $J$  = 3.9 Hz, 3F), -120.62 – -120.77 (m, 2F), -127.19 – -127.78 (m, 1F), -155.58 – -156.08 (m, 1F) ppm; ***Z*-isomer:**  $\delta$  = -83.18 – -83.24 (m, 3F), -96.21 (d,  $J$  = 19.7 Hz, 1F), -119.60 (dd,  $J$  = 17.3, 10.1 Hz, 2F), -139.94 – -140.16 (m, 1F) ppm.

**$^{13}C$  NMR (100 MHz,  $CDCl_3$ ) of *E*-isomer:**  $\delta$  = 151.4, 144.9 (dd,  $J_{C-F}$  = 256.5, 45.5 Hz), 141.4–137.8 (m, 1C), 134.0, 133.8, 132.0, 130.2, 129.4, 129.2, 128.4, 128.2, 127.3, 126.3, 125.9, 125.7, 123.9, 107.7 (dd,  $J_{C-F}$  = 28.2, 5.1 Hz) ppm, carbons corresponding to the  $C_2F_5$  group cannot be identified due to C-F coupling.

**HRMS (m/z):** calcd for  $C_{25}H_{15}BrF_7N_2O$   $[M+H]^+$  571.0250, found: 571.0255.

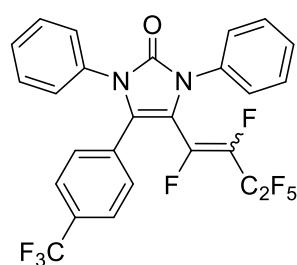

**4-(Perfluorobut-1-en-1-yl)-1,3-diphenyl-5-(4-(trifluoromethyl)phenyl)-1,3-dihydro-2H-imidazol-2-one (3aj):**

Yield = 44% (73.8 mg,  $E/Z$  = 4.6/1). Yellow solid.

Purified by flash column chromatography through silica gel (petroleum ether/ethyl acetate, 10/1).

**$^1H$  NMR (400 MHz,  $CDCl_3$ ) of *E*-isomer:**  $\delta$  = 7.56 (d,  $J$  = 8.3 Hz, 2H), 7.53–7.42 (m, 5H), 7.40–7.27 (m, 5H), 7.25–7.20 (m, 2H) ppm.

**$^{19}F$  NMR (376 MHz,  $CDCl_3$ ) of *E*-isomer:**  $\delta$  = -62.91 (s, 3F), -84.37 (t,  $J$  = 4.4 Hz, 3F), -120.72 – -120.87 (m, 2F), -127.24 – -127.86 (m, 1F), -155.29 – -155.84 (m, 1F) ppm; ***Z*-isomer:**  $\delta$  = -62.88, (s, 3F), -83.31 (d,  $J$  = 8.9 Hz, 3F), -96.57 (d,  $J$  = 19.3 Hz, 1F), -119.71 (s, 2F), -139.65 (ddt,

$J = 26.8, 17.9, 8.9$  Hz, 1F) ppm.

**$^{13}\text{C}$  NMR (100 MHz,  $\text{CDCl}_3$ ) of *E*-isomer:**  $\delta = 151.4, 144.5$  (dd,  $J_{\text{C-F}} = 266.7, 41.5$  Hz), 141.2–138.1 (m, 1C), 131.3 (q,  $J_{\text{C-F}} = 33.3$  Hz), 130.5, 129.6, 129.5, 129.3, 129.1, 128.5, 128.3, 127.3, 126.4, 126.0, 125.7 (q,  $J_{\text{C-F}} = 4.5$  Hz), 124.9, 122.2, 108.6 (dd,  $J_{\text{C-F}} = 26.7, 3.3$  Hz) ppm, carbons corresponding to the  $\text{C}_2\text{F}_5$  group cannot be identified due to C-F coupling.

**HRMS (m/z):** calcd for  $\text{C}_{26}\text{H}_{15}\text{F}_{10}\text{N}_2\text{O}$   $[\text{M}+\text{H}]^+$  561.1019, found: 561.1017.

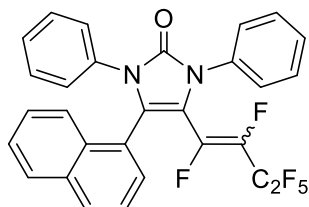

**4-(Naphthalen-1-yl)-5-(perfluorobut-1-en-1-yl)-1,3-diphenyl-1,3-dihydro-2H-imidazol-2-one (3ak):**

Yield = 43% (70.3 mg,  $E/Z = 10.6/1$ ). Yellow oil.

Purified by flash column chromatography through silica gel (petroleum ether/ethyl acetate, 10/1).

**$^1\text{H}$  NMR (400 MHz,  $\text{CDCl}_3$ ) of *E*-isomer:**  $\delta = 7.90\text{--}7.85$  (m, 1H), 7.81 (dt,  $J = 7.3, 3.0$  Hz, 2H), 7.59–7.39 (m, 9H), 7.20–7.07 (m, 5H) ppm.

**$^{19}\text{F}$  NMR (376 MHz,  $\text{CDCl}_3$ ) of *E*-isomer:**  $\delta = -84.78$  (t,  $J = 2.9$  Hz, 3F),  $-120.82$  (dd,  $J = 25.0, 13.1$  Hz, 2F),  $-130.33\text{--} -131.00$  (m, 1F),  $-156.46\text{--} -157.20$  (m, 1F) ppm; ***Z*-isomer:**  $\delta = -83.18$  (d,  $J = 9.0$  Hz, 3F),  $-96.44$  (d,  $J = 19.9$  Hz, 1F),  $-118.89\text{--} -119.07$  (m, 2F),  $-141.79\text{--} -142.02$  (m, 1F) ppm.

**$^{13}\text{C}$  NMR (100 MHz,  $\text{CDCl}_3$ ) of *E*-isomer:**  $\delta = 151.6, 144.8$  (dd,  $J_{\text{C-F}} = 266.7, 41.5$  Hz), 140.6–137.3 (m, 1C), 134.5, 134.1, 133.3, 131.4, 130.6, 129.5, 129.4, 129.3, 128.7, 128.4, 128.2, 127.8, 127.0, 126.6, 126.4, 125.7, 124.9, 124.4, 124.2, 109.2 (dd,  $J_{\text{C-F}} = 26.7, 5.1$  Hz) ppm, carbons corresponding to the  $\text{C}_2\text{F}_5$  group cannot be identified due to C-F coupling.

**HRMS (m/z):** calcd for  $\text{C}_{29}\text{H}_{18}\text{F}_7\text{N}_2\text{O}$   $[\text{M}+\text{H}]^+$  543.1302, found: 543.1306.

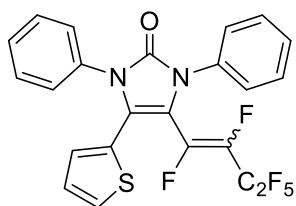

**4-(Perfluorobut-1-en-1-yl)-1,3-diphenyl-5-(thiophen-2-yl)-1,3-dihydro-2H-imidazol-2-one (3al):**

Yield = 67% (100.3 mg,  $E/Z = 11.8/1$ ). Yellow solid.

Purified by flash column chromatography through silica gel (petroleum ether/ethyl acetate, 10/1).

**$^1\text{H}$  NMR (400 MHz,  $\text{CDCl}_3$ ) of *E*-isomer:**  $\delta = 7.53\text{--}7.38$  (m, 8H), 7.37–7.30 (m, 3H), 6.98–6.89 (m, 2H) ppm.

**$^{19}\text{F}$  NMR (376 MHz,  $\text{CDCl}_3$ ) of *E*-isomer:**  $\delta = -84.29$  (t,  $J = 4.7$  Hz, 3F),  $-120.62\text{--} -120.77$  (m, 2F),  $-126.84\text{--} -127.58$  (m, 1F),  $-155.03$  (dddt,  $J = 150.1, 13.9, 8.9, 4.3$  Hz, 1F) ppm; ***Z*-isomer:**  $\delta = -83.25$  (d,  $J = 8.5$  Hz, 3F),  $-96.67$  (d,  $J = 20.6$  Hz, 1F),  $-119.62$  (dd,  $J = 17.5, 8.5$  Hz, 2F),

-139.93 (ddd,  $J = 29.6, 16.9, 8.6$  Hz, 1F) ppm.

**$^{13}\text{C}$  NMR (100 MHz,  $\text{CDCl}_3$ ) of *E*-isomer:**  $\delta = 151.3, 144.6$  (dd,  $J_{\text{C-F}} = 246.4, 43.4$  Hz), 141.8–138.6 (m, 1C), 134.0, 133.9, 129.4, 129.2, 128.62, 128.58, 128.4, 127.9, 127.2, 126.70, 126.67, 125.9, 123.6, 108.2 (dd,  $J_{\text{C-F}} = 26.7, 4.2$  Hz) ppm, carbons corresponding to the  $\text{C}_2\text{F}_5$  group cannot be identified due to C-F coupling.

**HRMS (m/z):** calcd for  $\text{C}_{23}\text{H}_{14}\text{F}_7\text{N}_2\text{OS}$   $[\text{M}+\text{H}]^+$  499.0710, found: 499.0712.

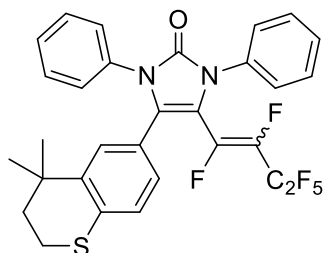

**4-(4,4-Dimethylthiochroman-6-yl)-5-(perfluorobut-1-en-1-yl)-1,3-diphenyl-1,3-dihydro-2H-imidazol-2-one (3am):**

Yield = 60% (107.1 mg,  $E/Z = 4.8/1$ ). Yellow solid.

Purified by flash column chromatography through silica gel (petroleum ether/ethyl acetate, 10/1).

**$^1\text{H}$  NMR (400 MHz,  $\text{CDCl}_3$ ) of *E*-isomer:**  $\delta = 7.52\text{--}7.44$  (m, 5H), 7.43–7.35 (m, 4H), 7.32 (dd,  $J = 7.1, 1.8$  Hz, 1H), 7.04–7.00 (m, 2H), 6.88 (dd,  $J = 8.2, 1.9$  Hz, 1H), 3.03–2.97 (m, 2H), 1.92–1.86 (m, 2H), 1.06 (s, 6H) ppm.

**$^{19}\text{F}$  NMR (376 MHz,  $\text{CDCl}_3$ ) of *E*-isomer:**  $\delta = -84.28 - -84.39$  (m, 3F),  $-120.39 - -120.55$  (m, 2F),  $-125.70 - -126.31$  (m, 1F),  $-155.81$  (dddd,  $J = 149.8, 17.9, 9.2, 4.3$  Hz, 1F) ppm; ***Z*-isomer:**  $\delta = -83.23$  (dd,  $J = 8.5, 2.3$  Hz, 3F),  $-95.48$  (dd,  $J = 21.6, 4.0$  Hz, 1F),  $-119.53 - -119.70$  (m, 2F),  $-140.96$  (dt,  $J = 23.5, 9.0$  Hz, 1F) ppm.

**$^{13}\text{C}$  NMR (100 MHz,  $\text{CDCl}_3$ ) of *E*-isomer:**  $\delta = 151.4, 145.5$  (dd,  $J_{\text{C-F}} = 257.6, 43.4$  Hz), 142.1, 141.1–138.5 (m, 1C), 134.3, 134.2, 134.1, 129.4, 129.3, 129.1, 128.1, 127.9, 127.5, 127.2, 126.7, 126.3, 125.9, 125.7, 121.9, 106.8 (dd,  $J_{\text{C-F}} = 27.8, 4.3$  Hz), 36.9, 32.7, 29.7, 23.0 ppm, carbons corresponding to the  $\text{C}_2\text{F}_5$  group cannot be identified due to C-F coupling.

**HRMS (m/z):** calcd for  $\text{C}_{30}\text{H}_{24}\text{F}_7\text{N}_2\text{OS}$   $[\text{M}+\text{H}]^+$  593.1492, found: 593.1496.

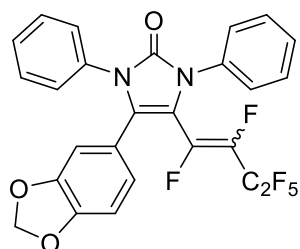

**4-(Benzo[d][1,3]dioxol-5-yl)-5-(perfluorobut-1-en-1-yl)-1,3-diphenyl-1,3-dihydro-2H-imidazol-2-one (3an):**

Yield = 46% (74.2 mg,  $E/Z = 8.4/1$ ). Yellow solid.

Purified by flash column chromatography through silica gel (petroleum ether/ethyl acetate, 10/1).

**$^1\text{H}$  NMR (400 MHz,  $\text{CDCl}_3$ ) of *E*-isomer:**  $\delta = 7.51\text{--}7.43$  (m, 4H), 7.40–7.30 (m, 4H), 7.25–7.22 (m, 2H), 6.75–6.70 (m, 2H), 6.56 (d,  $J = 1.6$  Hz, 1H), 5.96 (s, 2H) ppm.

**<sup>19</sup>F NMR (376 MHz, CDCl<sub>3</sub>) of *E*-isomer:**  $\delta$  = -84.37 (t,  $J$  = 4.4 Hz, 3F), -120.55 – -120.71 (m, 2F), -127.00 – -127.60 (m, 1F), -155.97 – -156.58 (m, 1F) ppm; ***Z*-isomer:**  $\delta$  = -83.14 (d,  $J$  = 8.7 Hz, 3F), -95.63 (d,  $J$  = 20.8 Hz, 1F), -119.50 (dd,  $J$  = 50.6, 17.3 Hz, 2F), -140.66 – -140.93 (m, 1F) ppm.

**<sup>13</sup>C NMR (100 MHz, CDCl<sub>3</sub>) of *E*-isomer:**  $\delta$  = 151.4, 148.6, 147.9, 145.0 (dd,  $J_{C-F}$  = 263.6, 43.4 Hz), 140.9–137.7 (m, 1C), 134.2, 134.1, 129.4, 129.1, 128.2, 128.0, 127.3, 126.3, 125.9, 123.3, 120.2, 109.0, 108.6, 107.3 (dd,  $J_{C-F}$  = 26.6, 5.1 Hz), 101.5 ppm, carbons corresponding to the C<sub>2</sub>F<sub>5</sub> group cannot be identified due to C-F coupling.

**HRMS (m/z):** calcd for C<sub>26</sub>H<sub>16</sub>F<sub>7</sub>N<sub>2</sub>O<sub>3</sub> [M+H]<sup>+</sup> 537.1044, found: 537.1045.

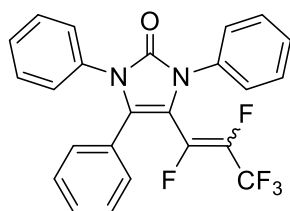

**4-(Perfluoroprop-1-en-1-yl)-1,3,5-triphenyl-1,3-dihydro-2H-imidazol-2-one (3ar):**

Yield = 61% (80.5 mg, *E/Z* = 2.5/1). Yellow oil.

Purified by flash column chromatography through silica gel (petroleum ether/ethyl acetate, 10/1).

**<sup>1</sup>H NMR (400 MHz, CDCl<sub>3</sub>) of *E*-isomer:**  $\delta$  = 7.52–7.47 (m, 4H), 7.44–7.39 (m, 1H), 7.35–7.29 (m, 6H), 7.26–7.22 (m, 2H), 7.19–7.15 (m, 2H) ppm.

**<sup>19</sup>F NMR (376 MHz, CDCl<sub>3</sub>) of *E*-isomer:**  $\delta$  = -68.00 (dd,  $J$  = 20.8, 11.9 Hz, 3F), -128.54 – -129.14 (m, 1F), -158.22 – -158.74 (m, 1F) ppm; ***Z*-isomer:**  $\delta$  = -68.67 (dd,  $J$  = 12.0, 7.4 Hz, 3F), -103.39 – -103.59 (m, 1F), -142.64 (dq,  $J$  = 20.3, 13.1 Hz, 1F) ppm.

**<sup>13</sup>C NMR (100 MHz, CDCl<sub>3</sub>) of *E*-isomer:**  $\delta$  = 151.5, 144.4–141.4 (m, 1C), 140.3–137.9 (m, 1C), 134.3, 134.1, 129.5, 129.43, 129.36, 129.0, 128.8, 128.6, 128.2, 127.9, 127.3, 126.4, 125.9, 107.3 (dd,  $J_{C-F}$  = 26.6, 5.1 Hz) ppm, carbons corresponding to the CF<sub>3</sub> group cannot be identified due to C-F coupling.

**HRMS (m/z):** calcd for C<sub>24</sub>H<sub>16</sub>F<sub>5</sub>N<sub>2</sub>O [M+H]<sup>+</sup> 443.1177, found: 443.1180.

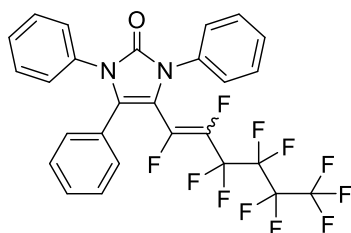

**4-(Perfluorohex-1-en-1-yl)-1,3,5-triphenyl-1,3-dihydro-2H-imidazol-2-one (3as):**

Yield = 60% (106.9 mg, *E/Z* = 7.5/1). Yellow solid.

Purified by flash column chromatography through silica gel (petroleum ether/ethyl acetate, 10/1).

**<sup>1</sup>H NMR (400 MHz, CDCl<sub>3</sub>) of *E*-isomer:**  $\delta$  = 7.50–7.45 (m, 4H), 7.35–7.21 (m, 9H), 7.18–7.15 (m, 2H) ppm.

**<sup>19</sup>F NMR (376 MHz, CDCl<sub>3</sub>) of *E*-isomer:**  $\delta$  = -80.95 (t,  $J$  = 9.9 Hz, 3F), -117.42 (dq,  $J$  = 25.3, 13.0 Hz, 2F), -124.31 – -124.60 (m,  $J$  = 8.9 Hz, 2F), -126.43 (t,  $J$  = 11.7 Hz, 2F), -126.50 – -127.07 (m, 1F), -154.77 – -155.49 (m, 1F) ppm.

**<sup>13</sup>C NMR (100 MHz, CDCl<sub>3</sub>) of *E*-isomer:**  $\delta$  = 151.5, 144.8 (dd,  $J_{C-F}$  = 263.6, 43.4 Hz), 140.7–137.8 (m, 1C), 134.3, 134.1, 129.4, 129.3, 129.0, 128.8, 128.6, 128.4, 128.2, 127.9, 127.4, 126.7, 126.3, 107.6 (dd,  $J_{C-F}$  = 27.6, 5.1 Hz) ppm, carbons corresponding to the C<sub>4</sub>F<sub>9</sub> group cannot be identified due to C-F coupling.

**HRMS (m/z):** calcd for C<sub>27</sub>H<sub>16</sub>F<sub>11</sub>N<sub>2</sub>O [M+H]<sup>+</sup> 593.1081, found: 593.1089.

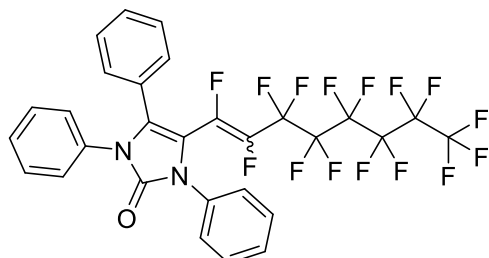

**4-(Perfluorooct-1-en-1-yl)-1,3,5-triphenyl-1,3-dihydro-2H-imidazol-2-one (3at):**

Yield = 58% (120.8 mg, *E/Z* = 7.3/1). Yellow solid.

Purified by flash column chromatography through silica gel (petroleum ether/ethyl acetate, 10/1).

**<sup>1</sup>H NMR (400 MHz, CDCl<sub>3</sub>) of *E*-isomer:**  $\delta$  = 7.47 (d,  $J$  = 3.8 Hz, 4H), 7.33–7.21 (m, 9H), 7.18–7.15 (m, 2H) ppm.

**<sup>19</sup>F NMR (376 MHz, CDCl<sub>3</sub>) of *E*-isomer:**  $\delta$  = -80.75 (t,  $J$  = 9.8 Hz, 3F), -117.26 (dq,  $J$  = 25.7, 13.1 Hz, 2F), -122.32 (s, 2F), -122.83 (s, 2F), -123.64 (s, 2F), -126.06 – -126.24 (m, 2F), -126.68 (dt,  $J$  = 149.3, 25.0, 6.3 Hz, 1F), -154.72 – -155.31 (m, 1F) ppm.

**<sup>13</sup>C NMR (100 MHz, CDCl<sub>3</sub>) of *E*-isomer:**  $\delta$  = 151.5, 145.2 (dd,  $J_{C-F}$  = 258.3, 42.6 Hz), 141.2–138.2 (m, 1C), 134.3, 134.1, 129.4, 129.3, 129.0, 128.9, 128.6, 128.2, 127.9, 127.4, 126.8, 126.3, 126.0, 107.6 (dd,  $J_{C-F}$  = 27.3, 5.1 Hz) ppm, carbons corresponding to the C<sub>6</sub>F<sub>13</sub> group cannot be identified due to C-F coupling.

**HRMS (m/z):** calcd for C<sub>29</sub>H<sub>16</sub>F<sub>15</sub>N<sub>2</sub>O [M+H]<sup>+</sup> 693.1018, found: 693.1018.

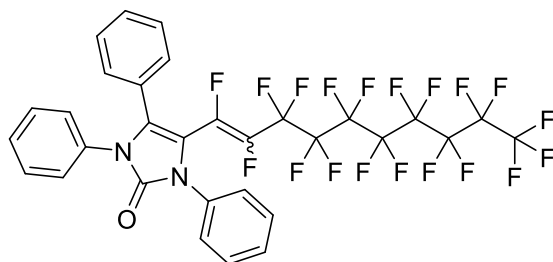

**4-(Perfluorodec-1-en-1-yl)-1,3,5-triphenyl-1,3-dihydro-2H-imidazol-2-one (3au):**

Yield = 38% (91.1 mg, *E/Z* = 6.8/1). Yellow solid.

Purified by flash column chromatography through silica gel (petroleum ether/ethyl acetate, 10/1).

**<sup>1</sup>H NMR (400 MHz, CDCl<sub>3</sub>) of *E*-isomer:**  $\delta$  = 7.49–7.46 (m, 4H), 7.34–7.20 (m, 9H), 7.18–7.15 (m, 2H) ppm.

**<sup>19</sup>F NMR (376 MHz, CDCl<sub>3</sub>) of *E*-isomer:**  $\delta$  = -80.69 (t,  $J$  = 9.7 Hz, 3F), -117.24 (dq,  $J$  = 25.2, 12.0 Hz, 2F), -121.56 – -122.24 (m, 6F), -122.67 (dq,  $J$  = 19.3, 8.9 Hz, 2F), -123.45 – -123.72 (m, 2F), -126.06 (q,  $J$  = 8.1 Hz, 2F), -126.36 – -126.98 (m, 1F), -154.97 (dt,  $J$  = 150.4, 14.6 Hz, 1F) ppm.

**<sup>13</sup>C NMR (100 MHz, CDCl<sub>3</sub>) of *E*-isomer:**  $\delta$  = 151.5, 145.1 (dd,  $J_{C-F}$  = 258.3, 42.6 Hz),



141.2–138.1 (m, 1C), 134.3, 134.1, 129.4, 129.3, 129.0, 128.9, 128.6, 128.3, 127.9, 127.4, 126.8, 126.3, 126.0, 107.6 (dd,  $J_{C-F} = 26.5, 5.2$  Hz) ppm, carbons corresponding to the  $C_8F_{17}$  group cannot be identified due to C-F coupling.

**HRMS (m/z):** calcd for  $C_{31}H_{16}F_{19}N_2O$   $[M+H]^+$  793.0954, found: 793.0954.

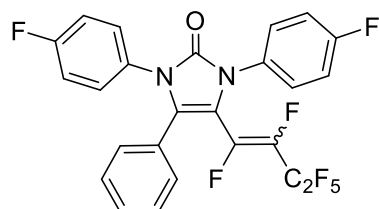

**1,3-Bis(4-fluorophenyl)-4-(perfluorobut-1-en-1-yl)-5-phenyl-1,3-dihydro-2H-imidazol-2-one (3ba):**

Yield = 67% (105.9 mg,  $E/Z = 5.9/1$ ). Yellow oil.

Purified by flash column chromatography through silica gel (petroleum ether/ethyl acetate, 10/1).

**$^1H$  NMR (400 MHz,  $CDCl_3$ ) of *E*-isomer:**  $\delta = 7.46$ – $7.41$  (m, 2H),  $7.36$ – $7.29$  (m, 3H),  $7.23$ – $7.13$  (m, 6H),  $7.06$ – $7.00$  (m, 2H) ppm.

**$^{19}F$  NMR (376 MHz,  $CDCl_3$ ) of *E*-isomer:**  $\delta = -84.41$  (t,  $J = 3.8$  Hz, 3F),  $-112.31$  (dt,  $J = 8.9, 4.4$  Hz, 1F),  $-112.62$  (d,  $J = 8.9$  Hz, 1F),  $-120.75$  (dd,  $J = 25.0, 12.3$  Hz, 2F),  $-127.64$  –  $-128.24$  (m, 1F),  $-155.56$  –  $-156.22$  (m, 1F) ppm; ***Z*-isomer:**  $\delta = -83.28$  (d,  $J = 8.9$  Hz, 3F),  $-96.57$  (d,  $J = 19.4$  Hz, 1F),  $-112.02$  (dd,  $J = 10.7, 6.7$  Hz, 1F),  $-112.65$  –  $-112.74$  (m, 1F),  $-119.58$  (d,  $J = 17.1$  Hz, 2F),  $-140.17$  (ddt,  $J = 26.7, 17.8, 9.0$  Hz, 1F) ppm.

**$^{13}C$  NMR (100 MHz,  $CDCl_3$ ) of *E*-isomer:**  $\delta = 163.2$  (d,  $J_{C-F} = 36.4$  Hz),  $160.7$  (d,  $J_{C-F} = 36.4$  Hz),  $151.5, 144.5$  (dd,  $J_{C-F} = 257.5, 42.7$  Hz),  $141.2$ – $137.9$  (m, 1C),  $130.0$  (d,  $J_{C-F} = 3.0$  Hz),  $129.6, 129.1$  (d,  $J_{C-F} = 9.2$  Hz),  $128.82, 128.78, 128.44, 128.35, 128.0$  (d,  $J_{C-F} = 8.1$  Hz),  $126.4, 116.5$  (d,  $J_{C-F} = 23.2$  Hz),  $116.2$  (d,  $J_{C-F} = 23.2$  Hz),  $107.6$  (dd,  $J_{C-F} = 27.3, 5.1$  Hz) ppm, carbons corresponding to the  $C_2F_5$  group cannot be identified due to C-F coupling.

**HRMS (m/z):** calcd for  $C_{25}H_{14}F_9N_2O$   $[M+H]^+$  529.0957, found: 529.0959.

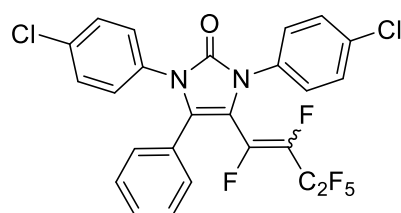

**1,3-Bis(4-chlorophenyl)-4-(perfluorobut-1-en-1-yl)-5-phenyl-1,3-dihydro-2H-imidazol-2-one (3ca):**

Yield = 66% (111.2 mg,  $E/Z = 5/1$ ). Yellow solid.

Purified by flash column chromatography through silica gel (petroleum ether/ethyl acetate, 10/1).

**$^1H$  NMR (400 MHz,  $CDCl_3$ ) of *E*-isomer:**  $\delta = 7.48$  (dq,  $J = 9.4, 2.7$  Hz, 2H),  $7.43$ – $7.38$  (m, 2H),  $7.38$ – $7.28$  (m, 5H),  $7.18$ – $7.13$  (m, 4H) ppm.

**$^{19}F$  NMR (376 MHz,  $CDCl_3$ ) of *E*-isomer:**  $\delta = -84.32$  (d,  $J = 5.5$  Hz, 3F),  $-120.60$  –  $-120.79$  (m, 2F),  $-127.66$  –  $-128.28$  (m, 1F),  $-155.35$  –  $-155.90$  (m, 1F) ppm; ***Z*-isomer:**  $\delta = -83.26$  (d,  $J = 9.0$  Hz, 3F),  $-96.34$  (d,  $J = 19.3$  Hz, 1F),  $-119.63$  (dd,  $J = 18.0, 7.6$  Hz, 2F),  $-139.76$  (dq,  $J = 17.9, 8.9$

Hz, 1F) ppm.

**<sup>13</sup>C NMR (100 MHz, CDCl<sub>3</sub>) of *E*-isomer:**  $\delta$  = 151.1, 144.6 (dd,  $J_{C-F}$  = 257.5, 42.7 Hz), 140.1–138.4 (m, 1C), 134.2, 133.8, 132.6, 132.4, 129.8, 129.6, 129.3, 128.9, 128.8, 128.4, 127.5, 127.1, 126.2, 107.5 (dd,  $J_{C-F}$  = 27.2, 4.1 Hz) ppm, carbons corresponding to the C<sub>2</sub>F<sub>5</sub> group cannot be identified due to C-F coupling.

**HRMS (m/z):** calcd for C<sub>25</sub>H<sub>14</sub>Cl<sub>2</sub>F<sub>7</sub>N<sub>2</sub>O [M+H]<sup>+</sup> 561.0366, found: 561.0369.

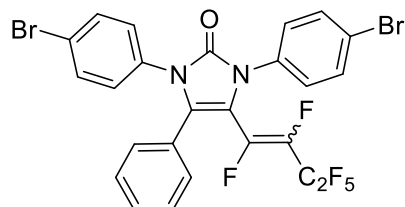

**1,3-Bis(4-bromophenyl)-4-(perfluorobut-1-en-1-yl)-5-phenyl-1,3-dihydro-2H-imidazol-2-one (3da):**

Yield = 73% (141.5 mg, *E/Z* = 5.1/1). Yellow oil.

Purified by flash column chromatography through silica gel (petroleum ether/ethyl acetate, 10/1).

**<sup>1</sup>H NMR (400 MHz, CDCl<sub>3</sub>) of *E*-isomer:**  $\delta$  = 7.66–7.60 (m, 2H), 7.47 (dd,  $J$  = 9.0, 2.6 Hz, 2H), 7.38–7.30 (m, 5H), 7.17–7.07 (m, 4H) ppm.

**<sup>19</sup>F NMR (376 MHz, CDCl<sub>3</sub>) of *E*-isomer:**  $\delta$  = -84.24 – -84.34 (m, 3F), -120.68 (dd,  $J$  = 26.0, 12.7 Hz, 2F), -127.99 (dtd,  $J$  = 149.1, 24.7, 5.7 Hz, 1F), -155.15 – -155.88 (m, 1F) ppm; ***Z*-isomer:**  $\delta$  = -83.24 (d,  $J$  = 8.8 Hz, 3F), -96.32 (d,  $J$  = 19.4 Hz, 1F), -119.63 (dd,  $J$  = 17.4, 9.7 Hz, 2F), -139.56 – -139.77 (m, 1F) ppm.

**<sup>13</sup>C NMR (100 MHz, CDCl<sub>3</sub>) of *E*-isomer:**  $\delta$  = 151.0, 144.6 (dd,  $J_{C-F}$  = 258.1, 43.2 Hz), 141.2–137.9 (m, 1C), 133.1, 132.9, 132.8, 132.6, 132.2, 129.8, 128.9, 128.8, 128.7, 127.3, 126.2, 122.2, 121.8, 107.5 (dd,  $J_{C-F}$  = 26.2, 5.1 Hz) ppm, carbons corresponding to the C<sub>2</sub>F<sub>5</sub> group cannot be identified due to C-F coupling.

**HRMS (m/z):** calcd for C<sub>25</sub>H<sub>14</sub>Br<sub>2</sub>F<sub>7</sub>N<sub>2</sub>O [M+H]<sup>+</sup> 648.9356, found: 648.9354.

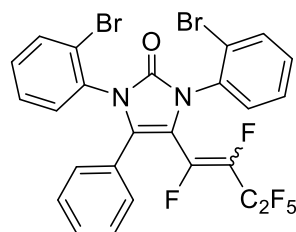

**1,3-Bis(2-bromophenyl)-4-(perfluorobut-1-en-1-yl)-5-phenyl-1,3-dihydro-2H-imidazol-2-one (3ea):**

Yield = 56% (109.9 mg, *E/Z* = 14.1/1). Yellow oil.

Purified by flash column chromatography through silica gel (petroleum ether/ethyl acetate, 10/1).

**<sup>1</sup>H NMR (400 MHz, CDCl<sub>3</sub>) of *E*-isomer:**  $\delta$  = 7.67–7.64 (m, 1H), 7.57–7.53 (m, 1H), 7.37 (ddd,  $J$  = 7.5, 3.8, 1.7 Hz, 1H), 7.27 (dd,  $J$  = 7.8, 1.7 Hz, 1H), 7.24–7.12 (m, 9H) ppm.

**<sup>19</sup>F NMR (376 MHz, CDCl<sub>3</sub>) of *E*-isomer:**  $\delta$  = -84.49 (t,  $J$  = 4.0 Hz, 3F), -120.77 – -120.96 (m, 2F), -131.50 – -132.20 (m, 1F), -155.63 – -156.30 (m, 1F) ppm; ***Z*-isomer:**  $\delta$  = -82.94 (dd,  $J$  = 24.6, 9.2 Hz, 3F), -100.03 (s, 1F), -118.82 (d,  $J$  = 18.4 Hz, 2F), -140.19 – -141.53 (m, 1F) ppm.

**<sup>13</sup>C NMR (100 MHz, CDCl<sub>3</sub>) of *E*-isomer:**  $\delta$  = 150.3, 144.6 (dd,  $J_{C-F}$  = 258.1, 43.2 Hz), 140.6–137.8 (m, 1C), 133.73, 133.69, 133.5, 133.4, 131.5, 131.1, 131.0, 130.7, 130.5, 129.6, 128.7, 128.6, 128.4, 128.3, 126.5, 124.1, 123.5, 108.0 (dd,  $J_{C-F}$  = 27.1, 7.1 Hz) ppm, carbons corresponding to the C<sub>2</sub>F<sub>5</sub> group cannot be identified due to C-F coupling.

**HRMS (m/z):** calcd for C<sub>25</sub>H<sub>14</sub>Br<sub>2</sub>F<sub>7</sub>N<sub>2</sub>O [M+H]<sup>+</sup> 648.9356, found: 648.9355.

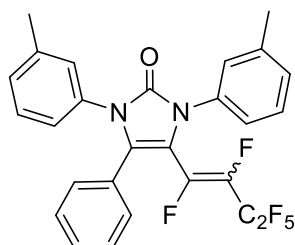

**4-(Perfluorobut-1-en-1-yl)-5-phenyl-1,3-di-*m*-tolyl-1,3-dihydro-2H-imidazol-2-one (3fa):**

Yield = 44% (69.5 mg, *E/Z* = 9.6/1). Yellow solid.

Purified by flash column chromatography through silica gel (petroleum ether/ethyl acetate, 10/1).

**<sup>1</sup>H NMR (400 MHz, CDCl<sub>3</sub>) of *E*-isomer:**  $\delta$  = 7.40–7.26 (m, 6H), 7.24–7.14 (m, 5H), 7.10 (d,  $J$  = 7.9 Hz, 1H), 6.94 (d,  $J$  = 8.0 Hz, 1H), 2.41 (s, 3H), 2.30 (s, 3H) ppm.

**<sup>19</sup>F NMR (376 MHz, CDCl<sub>3</sub>) of *E*-isomer:**  $\delta$  = -84.42 (d,  $J$  = 4.3 Hz, 3F), -120.65 – -120.83 (m, 2F), -126.90 – -127.52 (m, 1F), -156.02 – -156.80 (m, 1F) ppm; ***Z*-isomer:**  $\delta$  = -83.20 (d,  $J$  = 9.0 Hz, 3F), -96.19 (d,  $J$  = 20.9 Hz, 1F), -119.59 (dd,  $J$  = 17.2, 8.0 Hz, 2F), -141.24 (dd,  $J$  = 19.6, 9.2 Hz, 1F) ppm.

**<sup>13</sup>C NMR (100 MHz, CDCl<sub>3</sub>) of *E*-isomer:**  $\delta$  = 151.6, 147.4–143.4 (m, 1C), 141.8–140.5 (m, 1C), 139.4, 139.0, 134.1, 134.0, 129.3, 129.2, 129.1, 129.0, 128.8, 128.72, 128.66, 128.6, 128.0, 126.9, 126.5, 124.4, 122.8, 107.5 (dd,  $J_{C-F}$  = 27.1, 6.1 Hz), 21.2 (2C) ppm, carbons corresponding to the C<sub>2</sub>F<sub>5</sub> group cannot be identified due to C-F coupling.

**HRMS (m/z):** calcd for C<sub>27</sub>H<sub>20</sub>F<sub>7</sub>N<sub>2</sub>O [M+H]<sup>+</sup> 521.1458, found: 521.1460.

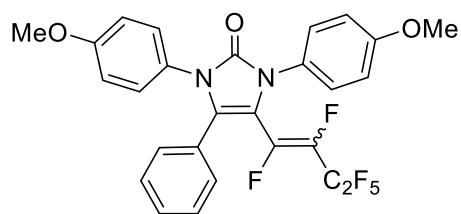

**1,3-Bis(4-methoxyphenyl)-4-(perfluorobut-1-en-1-yl)-5-phenyl-1,3-dihydro-2H-imidazol-2-one (3ga):**

Yield = 61% (100.6 mg, *E/Z* = 5.4/1). Yellow oil.

Purified by flash column chromatography through silica gel (petroleum ether/ethyl acetate, 10/1).

**<sup>1</sup>H NMR (400 MHz, CDCl<sub>3</sub>) of *E*-isomer:**  $\delta$  = 7.39–7.35 (m, 2H), 7.33–7.27 (m, 3H), 7.18–7.11 (m, 4H), 7.01–6.98 (m, 2H), 6.87–6.82 (m, 2H), 3.83 (s, 3H), 3.76 (s, 3H) ppm.

**<sup>19</sup>F NMR (376 MHz, CDCl<sub>3</sub>) of *E*-isomer:**  $\delta$  = -84.37 (d,  $J$  = 5.0 Hz, 3F), -120.68 (dd,  $J$  = 23.1, 15.6 Hz, 2F), -127.22 – -127.82 (m, 1F), -156.39 – -156.94 (m, 1F) ppm; ***Z*-isomer:**  $\delta$  = -83.24 (d,  $J$  = 9.0 Hz, 3F), -96.21 (d,  $J$  = 21.5 Hz, 1F), -119.39 – -119.59 (m, 2F), -141.06 – -141.26 (m, 1F) ppm.

**<sup>13</sup>C NMR (100 MHz, CDCl<sub>3</sub>) of *E*-isomer:**  $\delta$  = 159.3, 158.9, 151.9, 145.2 (dd,  $J_{C-F}$  = 256.9, 43.0

Hz), 140.9–137.4 (m, 1C), 129.6, 129.3, 128.9, 128.8, 128.6, 128.0, 127.5, 127.0, 126.9, 114.6, 114.2, 107.4 (dd,  $J_{C-F} = 26.3, 5.1$  Hz), 55.4, 55.3 ppm, carbons corresponding to the  $C_2F_5$  group cannot be identified due to C-F coupling.

**HRMS (m/z):** calcd for  $C_{27}H_{20}F_7N_2O_3$   $[M+H]^+$  553.1357, found: 553.1349.

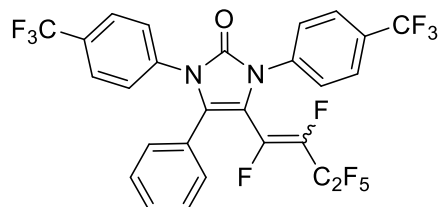

**4-(Perfluorobut-1-en-1-yl)-5-phenyl-1,3-bis(4-(trifluoromethyl)phenyl)-1,3-dihydro-2H-imidazol-2-one (3ha):**

Yield = 55% (102.9 mg,  $E/Z = 4.8/1$ ). Yellow solid.

Purified by flash column chromatography through silica gel (petroleum ether/ethyl acetate, 10/1).

**$^1H$  NMR (400 MHz,  $CDCl_3$ ) of *E*-isomer:**  $\delta = 7.79$  (dd,  $J = 8.8, 2.8$  Hz, 2H), 7.62 (dd,  $J = 8.7, 2.4$  Hz, 4H), 7.42–7.32 (m, 5H), 7.18 (tt,  $J = 6.8, 1.5$  Hz, 2H) ppm.

**$^{19}F$  NMR (376 MHz,  $CDCl_3$ ) of *E*-isomer:**  $\delta = -62.59$  (s, 3F), -62.62 (s, 3F), -84.39 (q,  $J = 4.1$  Hz, 3F), -120.81 (ddd,  $J = 25.8, 13.0, 3.2$  Hz, 2F), -127.85 – -128.46 (m, 1F), -155.04 (dt,  $J = 149.4, 13.9, 4.2$  Hz, 1F) ppm; ***Z*-isomer:**  $\delta = -62.54$  (s, 3F), -62.56 (s, 3F), -83.33 (d,  $J = 8.2$  Hz, 3F), -96.48 (d,  $J = 18.6$  Hz, 1F), -119.75 – -119.90 (m, 2F), -139.07 (dq,  $J = 17.4, 8.8$  Hz, 1F) ppm.

**$^{13}C$  NMR (100 MHz,  $CDCl_3$ ) of *E*-isomer:**  $\delta = 150.9, 145.9, 145.4$  (dd,  $J_{C-F} = 257.7, 43.4$  Hz), 141.8–138.7 (m, 1C), 137.1, 136.9, 130.5, 130.1 (q,  $J_{C-F} = 43.0$  Hz), 129.8, 129.1, 128.8, 127.3, 126.7 (q,  $J_{C-F} = 3.7$  Hz), 126.3, 126.2 (q,  $J_{C-F} = 7.2$  Hz), 125.9, 124.9 (d,  $J_{C-F} = 4.7$  Hz), 122.2 (d,  $J_{C-F} = 4.7$  Hz), 107.7 (dd,  $J_{C-F} = 27.4, 5.1$  Hz) ppm, carbons corresponding to the  $C_2F_5$  group cannot be identified due to C-F coupling.

**HRMS (m/z):** calcd for  $C_{27}H_{14}F_{13}N_2O$   $[M+H]^+$  629.0893, found: 629.0896.

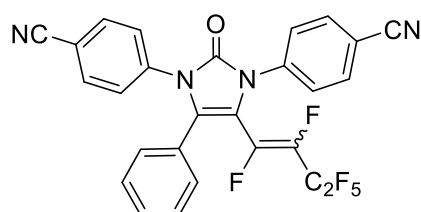

**4,4'-(2-Oxo-4-(perfluorobut-1-en-1-yl)-5-phenyl-1H-imidazole-1,3(2H)-diyl)dibenzonitrile (3ia):**

Yield = 72% (117.9 mg,  $E/Z = 3.9/1$ ). Yellow oil.

Purified by flash column chromatography through silica gel (petroleum ether/ethyl acetate, 10/1).

**$^1H$  NMR (400 MHz,  $CDCl_3$ ) of *E*-isomer:**  $\delta = 7.84$ –7.78 (m, 2H), 7.65–7.58 (m, 4H), 7.44–7.31 (m, 5H), 7.17–7.10 (m, 2H) ppm.

**$^{19}F$  NMR (376 MHz,  $CDCl_3$ ) of *E*-isomer:**  $\delta = -84.24$  (d,  $J = 4.2$  Hz, 3F), -120.69 (dd,  $J = 24.1, 13.6$  Hz, 2F), -127.92 – -128.58 (m, 1F), -154.15 – -154.71 (m, 1F) ppm; ***Z*-isomer:**  $\delta = -83.28$  (d,  $J = 8.6$  Hz, 3F), -96.21 (d,  $J = 19.1$  Hz, 1F), -119.83 (d,  $J = 16.6$  Hz, 2F), -138.28 (dt,  $J = 17.5, 8.8$  Hz, 1F) ppm.

**<sup>13</sup>C NMR (100 MHz, CDCl<sub>3</sub>) of *E*-isomer:**  $\delta$  = 150.4, 143.2 (dd,  $J_{C-F}$  = 259.6, 43.5 Hz), 141.3–138.9 (m, 1C), 137.8, 137.5, 133.4, 132.9, 130.4, 129.2, 128.7, 127.5, 126.1, 125.9, 125.6, 117.8, 112.0, 111.79, 111.76, 107.6 (dd,  $J_{C-F}$  = 27.2, 5.2 Hz) ppm, carbons corresponding to the C<sub>2</sub>F<sub>5</sub> group cannot be identified due to C-F coupling.

**HRMS (m/z):** calcd for C<sub>27</sub>H<sub>14</sub>F<sub>7</sub>N<sub>4</sub>O [M+H]<sup>+</sup> 543.1050, found: 543.1054.

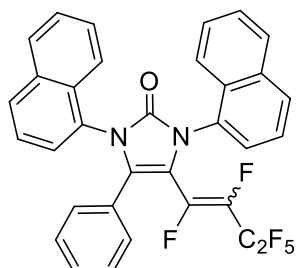

**1,3-Di(naphthalen-1-yl)-4-(perfluorobut-1-en-1-yl)-5-phenyl-1,3-dihydro-2H-imidazol-2-one (3ja):**

Yield = 72% (128.4 mg, *E/Z* = 8.6/1). Yellow oil.

Purified by flash column chromatography through silica gel (petroleum ether/ethyl acetate, 10/1).

**<sup>1</sup>H NMR (400 MHz, CDCl<sub>3</sub>) of *E*-isomer:**  $\delta$  = 8.02–7.94 (m, 4H), 7.93–7.86 (m, 3H), 7.73 (dd,  $J$  = 7.3, 1.3 Hz, 1H), 7.68–7.58 (m, 4H), 7.55–7.46 (m, 2H), 7.24–7.12 (m, 5H) ppm.

**<sup>19</sup>F NMR (376 MHz, CDCl<sub>3</sub>) of *E*-isomer:**  $\delta$  = -84.57 – -84.78 (m, 3F), -120.97 (td,  $J$  = 23.5, 22.5, 11.6 Hz, 2F), -129.05 – -130.04 (m, 1F), -155.76 – -156.57 (m, 1F) ppm; ***Z*-isomer:**  $\delta$  = -82.83 (t,  $J$  = 9.7 Hz, 3F), -97.16 (dd,  $J$  = 27.1, 19.8 Hz, 1F), -119.15 (d,  $J$  = 19.8 Hz, 2F), -140.73 – -141.63 (m, 1F) ppm.

**<sup>13</sup>C NMR (100 MHz, CDCl<sub>3</sub>) of *E*-isomer:**  $\delta$  = 152.1, 145.2 (dd,  $J_{C-F}$  = 259.6, 47.5 Hz), 140.7–137.9 (m, 1C), 134.4, 134.3, 134.2, 130.7, 130.4, 130.0, 129.7, 129.4, 128.5, 128.3, 127.5, 127.3, 127.2, 126.8, 126.61, 126.56, 126.5, 126.3, 125.3, 125.20, 125.15, 122.6, 122.5, 122.4, 122.0, 109.0 (dd,  $J_{C-F}$  = 26.4, 5.2 Hz) ppm, carbons corresponding to the C<sub>2</sub>F<sub>5</sub> group cannot be identified due to C-F coupling.

**HRMS (m/z):** calcd for C<sub>33</sub>H<sub>20</sub>F<sub>7</sub>N<sub>2</sub>O [M+H]<sup>+</sup> 593.1458, found: 593.1459.

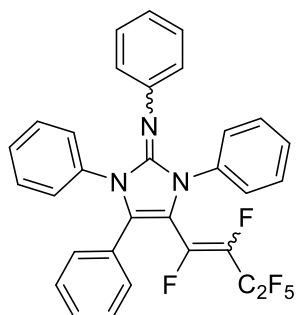

**3-(3,5-Dimethyl-4-nitro-1H-pyrazol-1-yl)-5,5,6,6,7,7,8,8,8-nonafluoro-2-methyloct-3-en-2-ol (3ma):**

Yield = 78% (133.3 mg, *E/Z* = 4.2/1). Yellow solid.

Purified by flash column chromatography through silica gel (petroleum ether/ethyl acetate, 10/1).

**<sup>1</sup>H NMR (400 MHz, CDCl<sub>3</sub>) of *E*-isomer:**  $\delta$  = 7.26–7.10 (m, 15H), 6.78–6.71 (m, 2H), 6.55–6.49 (m, 3H) ppm.

**<sup>19</sup>F NMR (376 MHz, CDCl<sub>3</sub>) of *E*-isomer:**  $\delta$  = -84.51 (q,  $J$  = 4.0 Hz, 3F), -120.68 – -120.83 (m, 2F), -125.72 – -126.31 (m, 1F), -156.01 (dt,  $J$  = 153.2, 14.0, 4.5 Hz, 1F) ppm; ***Z*-isomer:**  $\delta$  = -83.12 – -83.22 (m, 3F), -96.57 (d,  $J$  = 24.4 Hz, 1F), -119.21 (dd,  $J$  = 30.4, 18.3 Hz, 2F), -141.34 – -141.57 (m, 1F) ppm.

**<sup>13</sup>C NMR (100 MHz, CDCl<sub>3</sub>) of *E*-isomer:**  $\delta$  = 147.8, 145.2 (dd,  $J_{C-F}$  = 259.6, 47.5 Hz), 144.0, 141.6–138.3 (m, 1C), 135.9, 135.6, 132.2, 129.1, 128.9, 128.7, 128.6, 128.5, 128.4, 127.8, 127.7, 127.5, 127.2, 127.0, 122.2, 120.0, 110.3 (dd,  $J_{C-F}$  = 26.4, 4.5 Hz) ppm, carbons corresponding to the C<sub>2</sub>F<sub>5</sub> group cannot be identified due to C-F coupling.

**HRMS (m/z):** calcd for C<sub>31</sub>H<sub>21</sub>F<sub>7</sub>N<sub>3</sub> [M+H]<sup>+</sup> 568.1618, found:568.1620.

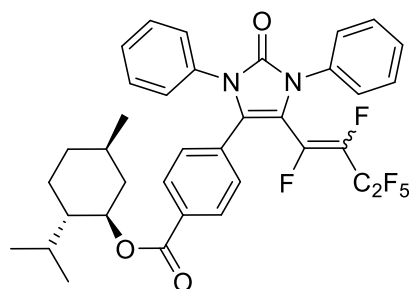

**(1*R*,2*S*,5*R*)-2-Isopropyl-5-methylcyclohexyl**

**4-(2-oxo-5-(perfluorobut-1-en-1-yl)-1,3-diphenyl-2,3-dihydro-1*H*-imidazol-4-yl)benzoate**

**(3av):**

Yield = 37% (49.3 mg, 0.2 mmol scale, *E/Z* = 5.4/1). Yellow oil.

Purified by flash column chromatography through silica gel (petroleum ether/ethyl acetate, 10/1).

**<sup>1</sup>H NMR (400 MHz, CDCl<sub>3</sub>) of *E*-isomer:**  $\delta$  = 7.98–7.94 (m, 2H), 7.52–7.42 (m, 5H), 7.37–7.33 (m, 2H), 7.25–7.21 (m, 4H), 4.92 (td,  $J$  = 10.9, 4.4 Hz, 1H), 2.14–2.07 (m, 1H), 1.97–1.89 (m, 1H), 1.73 (dt,  $J$  = 11.6, 3.0 Hz, 2H), 1.57–1.51 (m, 2H), 1.15–1.05 (m, 2H), 0.91 (dd,  $J$  = 6.8, 3.4 Hz, 8H), 0.78 (d,  $J$  = 6.9 Hz, 3H) ppm.

**<sup>19</sup>F NMR (376 MHz, CDCl<sub>3</sub>) of *E*-isomer:**  $\delta$  = -84.31 (t,  $J$  = 4.2 Hz, 3F), -120.66 – -120.84 (m, 2F), -126.99 – -127.61 (m, 1F), -155.29 – -155.85 (m, 1F) ppm; ***Z*-isomer:**  $\delta$  = -83.22 (tt,  $J$  = 5.5, 2.7 Hz, 3F), -96.01 – -96.44 (m, 1F), -119.54 – -119.76 (m, 2F), -139.75 (dq,  $J$  = 18.3, 8.9 Hz, 1F) ppm.

**<sup>13</sup>C NMR (100 MHz, CDCl<sub>3</sub>) of *E*-isomer:**  $\delta$  = 165.3, 151.6, 147.5–143.6 (m, 1C), 142.3–138.9 (m, 1C), 134.1, 134.0, 131.6, 131.0, 130.0, 129.6, 129.4, 128.8, 128.6, 128.3, 127.4, 126.1, 109.0–108.3 (m, 1C), 75.5, 47.3, 41.0, 34.3, 31.5, 26.5, 23.6, 22.1, 20.8, 16.5 ppm, carbons corresponding to the C<sub>2</sub>F<sub>5</sub> group cannot be identified due to C-F coupling.

**HRMS (m/z):** calcd for C<sub>36</sub>H<sub>34</sub>F<sub>7</sub>N<sub>2</sub>O<sub>3</sub> [M+H]<sup>+</sup> 675.2452, found: 675.2458.

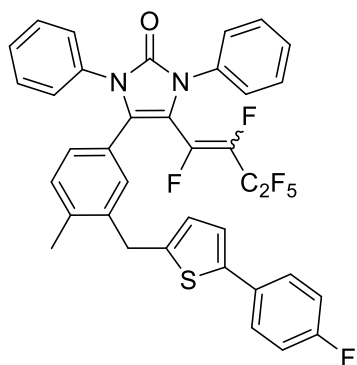

**4-(3-((5-(4-Fluorophenyl)thiophen-2-yl)methyl)-4-methylphenyl)-5-(perfluorobut-1-en-1-yl)-1,3-diphenyl-1,3-dihydro-2H-imidazol-2-one (3aw):**

Yield = 33% (68.6 mg, *E/Z* = 4.9/1). Yellow oil.

Purified by flash column chromatography through silica gel (petroleum ether/ethyl acetate, 10/1).

**<sup>1</sup>H NMR (400 MHz, CDCl<sub>3</sub>) of *E*-isomer:**  $\delta$  = 7.51–7.38 (m, 7H), 7.33–7.20 (m, 5H), 7.15–6.94 (m, 6H), 6.40 (d, *J* = 3.7 Hz, 1H), 3.98 (s, 2H), 2.29 (s, 3H) ppm.

**<sup>19</sup>F NMR (376 MHz, CDCl<sub>3</sub>) of *E*-isomer:**  $\delta$  = -84.32 (q, *J* = 3.8, 3.1 Hz, 3F), -114.72 – -114.88 (m, 1F), -120.54 (dd, *J* = 24.1, 13.8 Hz, 2F), -126.72 – -127.35 (m, 1F), -156.02 – -156.64 (m, 1F) ppm; ***Z*-isomer:**  $\delta$  = -83.11 (d, *J* = 8.9 Hz, 3F), -95.45 (d, *J* = 20.9 Hz, 1F), -114.83 – -114.93 (m, 1F), -119.44 (dd, *J* = 97.0, 17.5 Hz, 2F), -140.61 – -140.96 (m, 1F) ppm.

**<sup>13</sup>C NMR (100 MHz, CDCl<sub>3</sub>) of *E*-isomer:**  $\delta$  = 161.5 (d, *J*<sub>C-F</sub> = 246.5 Hz), 151.5, 146.4 (d, *J*<sub>C-F</sub> = 42.5 Hz), 143.9 (d, *J*<sub>C-F</sub> = 42.3 Hz), 141.9, 141.6, 138.7, 138.1, 134.3, 134.2, 130.8, 129.8, 129.3, 129.0, 128.1, 127.8, 127.4, 127.2, 127.0 (d, *J*<sub>C-F</sub> = 8.2 Hz), 126.3, 126.1, 125.9, 124.6, 122.6, 122.57, 115.7 (d, *J*<sub>C-F</sub> = 21.7 Hz), 107.2 (dd, *J*<sub>C-F</sub> = 27.1, 5.1 Hz), 33.6, 19.3 ppm, carbons corresponding to the C<sub>2</sub>F<sub>5</sub> group cannot be identified due to C-F coupling.

**HRMS (m/z):** calcd for C<sub>37</sub>H<sub>25</sub>F<sub>8</sub>N<sub>2</sub>OS [M+H]<sup>+</sup> 697.1554, found: 697.1560.

## References

- [1] a) G. Wu, A. Jacobi von Wangelin, *Chem. Sci.* **2018**, 9, 1795-1802; b) W. Han, Y.-L. Chen, X. Tang, J. Zhou, M. Ma, Z.-L. Shen, X.-Q. Chu, *Green Chem.* **2023**, 25, 9672–9679.
- [2] T. Xu, C. W. Cheung, X. Hu, *Angew. Chem. Int. Ed.* **2014**, 53, 4910-4914.
- [3] J. Wu, C. Wang, Z. Wang, H. Li, R. Liu, Y. Wang, P. Zhou, D. Li, J. Yang, *Synthesis* **2022**, 54, 3055–3068.
- [4] M. Wang, J. Han, X. Si, Y. Hu, J. Zhu, X. Sun, *Tetrahedron Lett.* **2018**, 59, 1614–1618.

# <sup>1</sup>H, <sup>19</sup>F, and <sup>13</sup>C NMR spectra of products

<sup>1</sup>H NMR spectra of the product **3aa** (400 MHz, CDCl<sub>3</sub>)

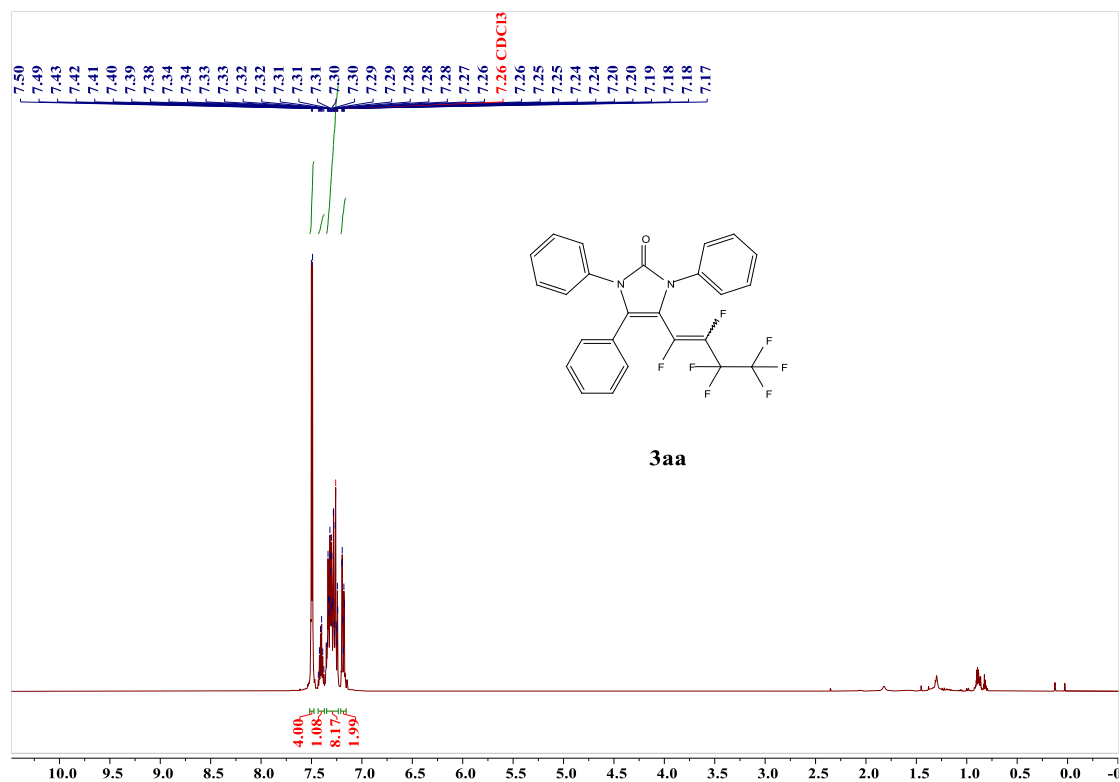

<sup>19</sup>F NMR spectra of the product **3aa** (376 MHz, CDCl<sub>3</sub>)

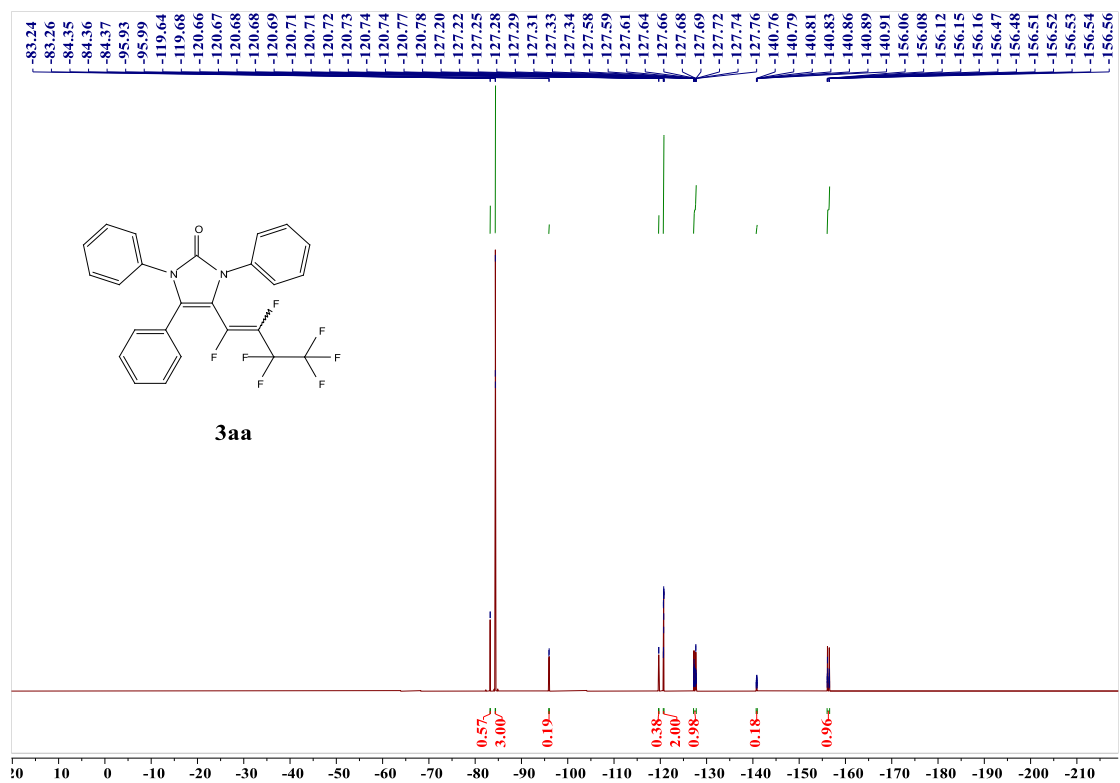



$^{13}\text{C}$  NMR spectra of the product **3aa** (100 MHz,  $\text{CDCl}_3$ )

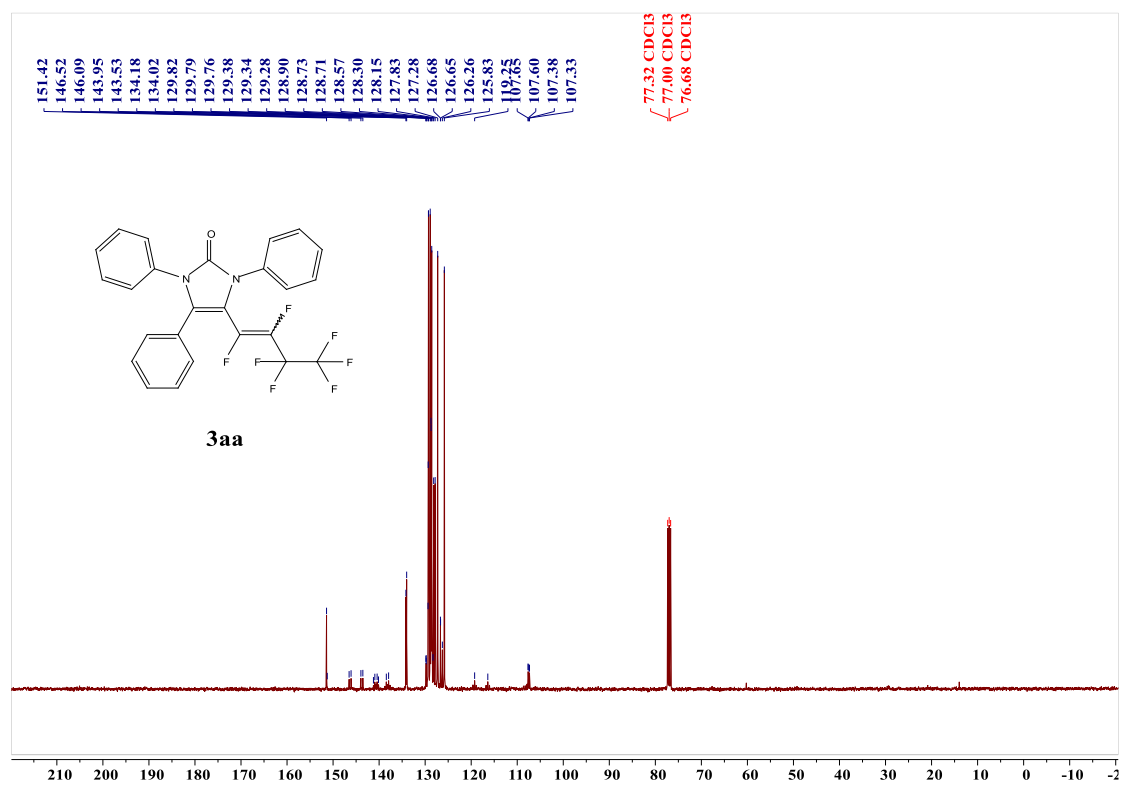

$^1\text{H}$  NMR spectra of the product **3ab** (400 MHz,  $\text{CDCl}_3$ )

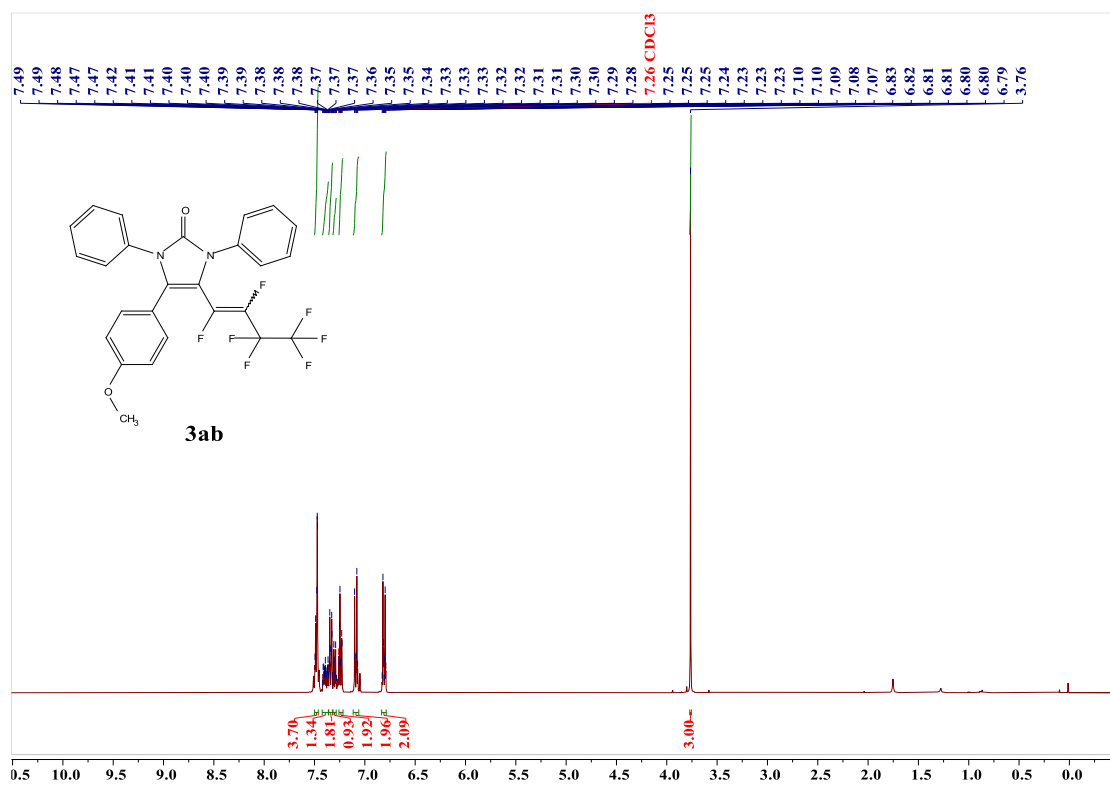

<sup>19</sup>F NMR spectra of the product **3ab** (376 MHz, CDCl<sub>3</sub>)

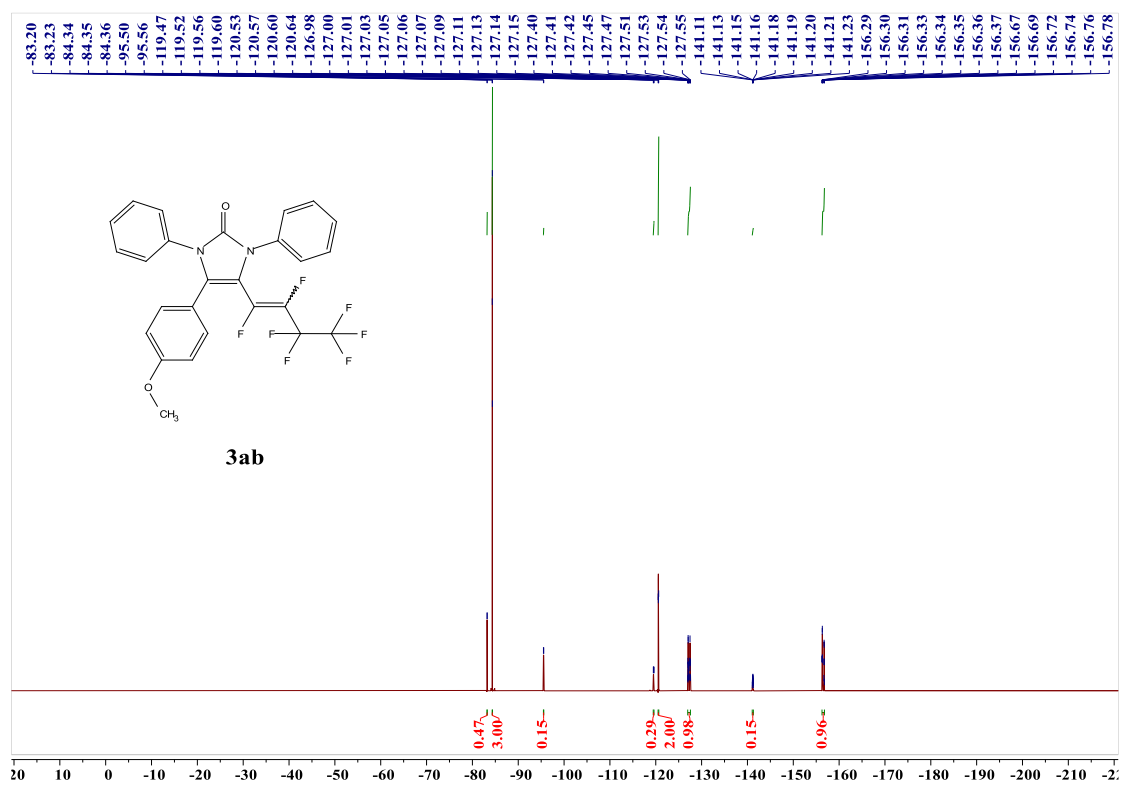

<sup>13</sup>C NMR spectra of the product **3ab** (100 MHz, CDCl<sub>3</sub>)

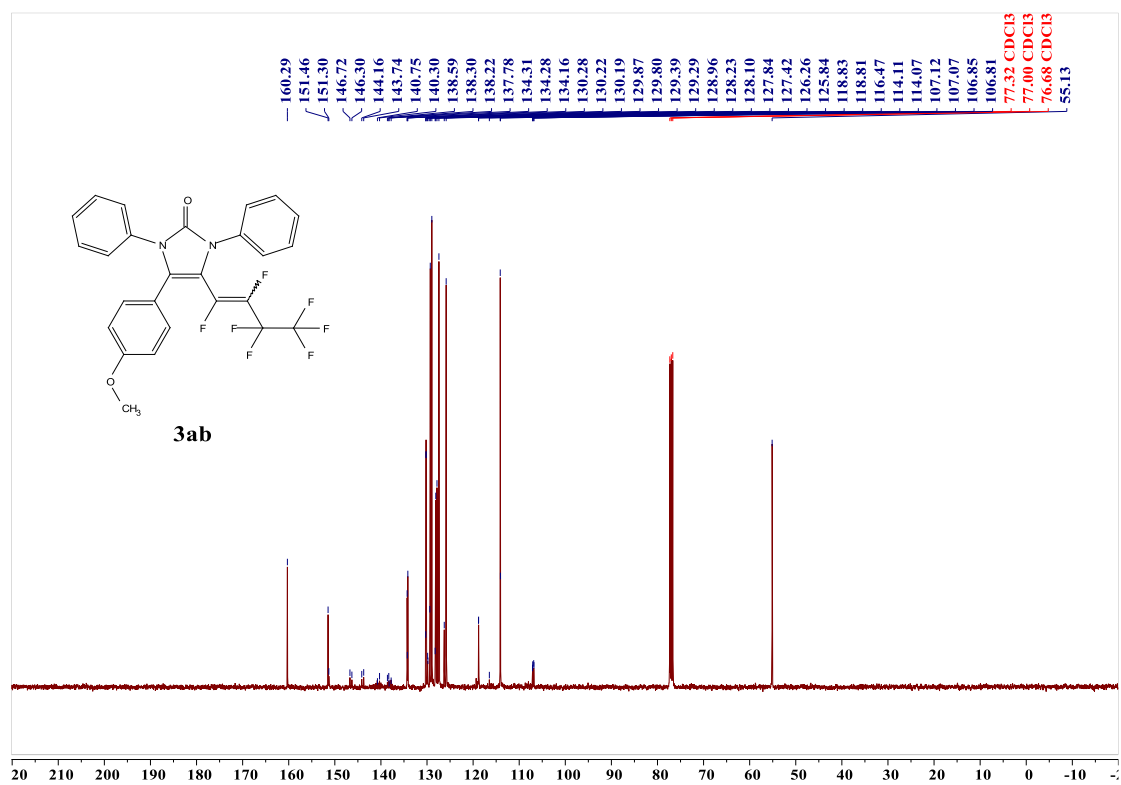

<sup>1</sup>H NMR spectra of the product **3ac** (400 MHz, CDCl<sub>3</sub>)

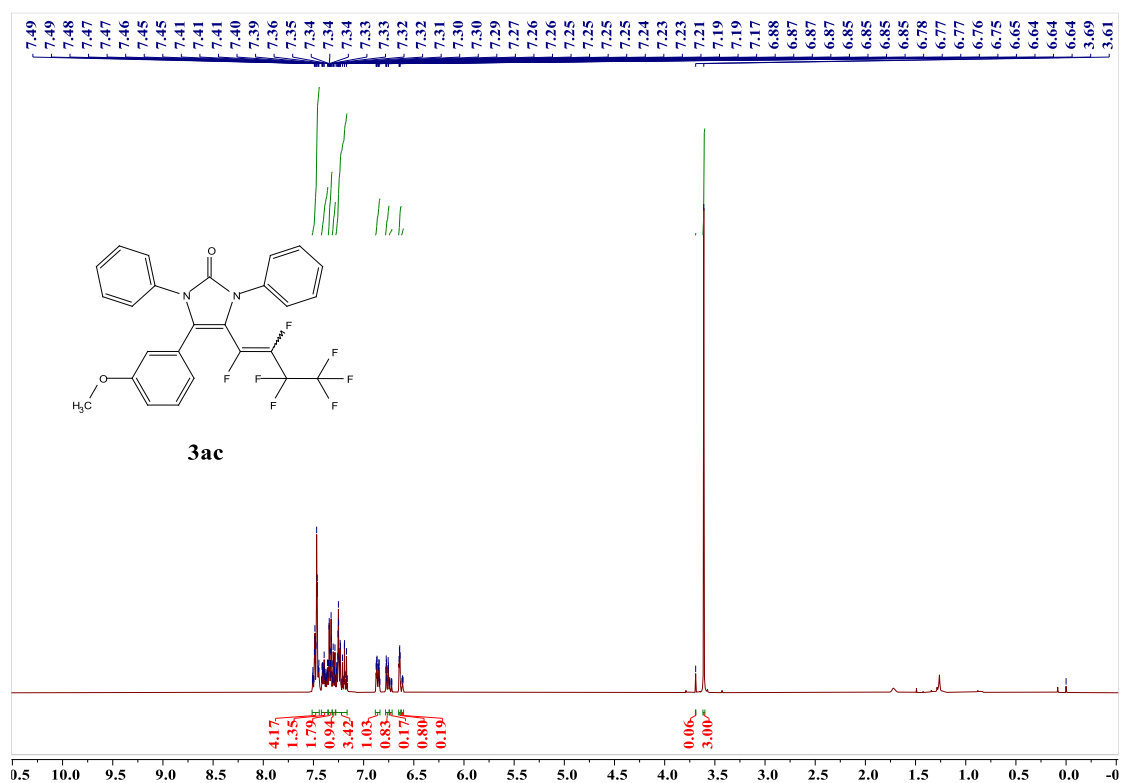

<sup>19</sup>F NMR spectra of the product **3ac** (376 MHz, CDCl<sub>3</sub>)

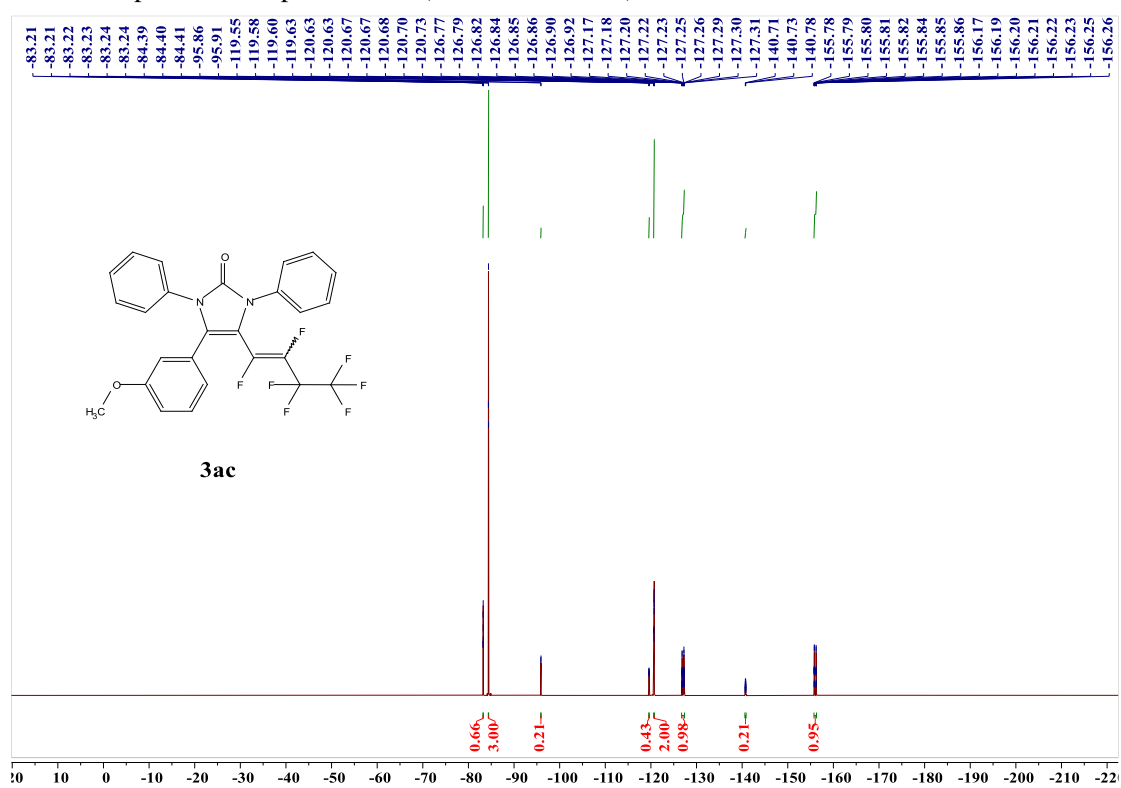

$^{13}\text{C}$  NMR spectra of the product **3ac** (100 MHz,  $\text{CDCl}_3$ )

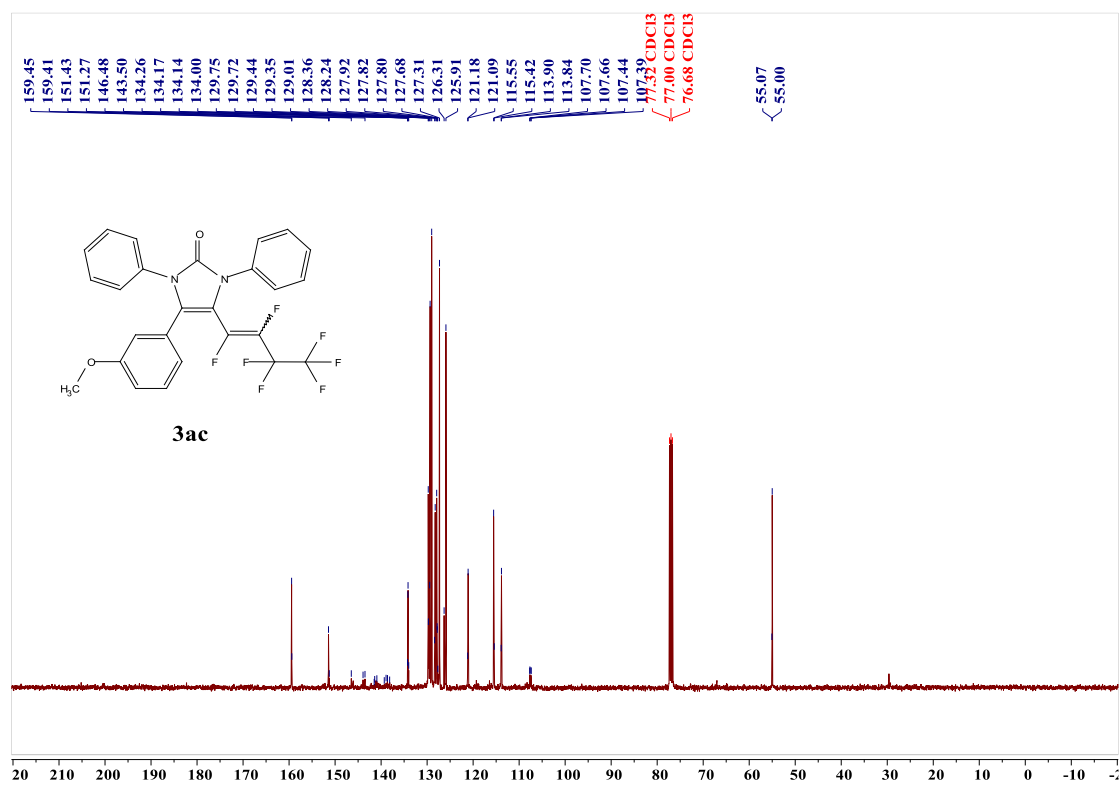

$^1\text{H}$  NMR spectra of the product **3ad** (400 MHz,  $\text{CDCl}_3$ )

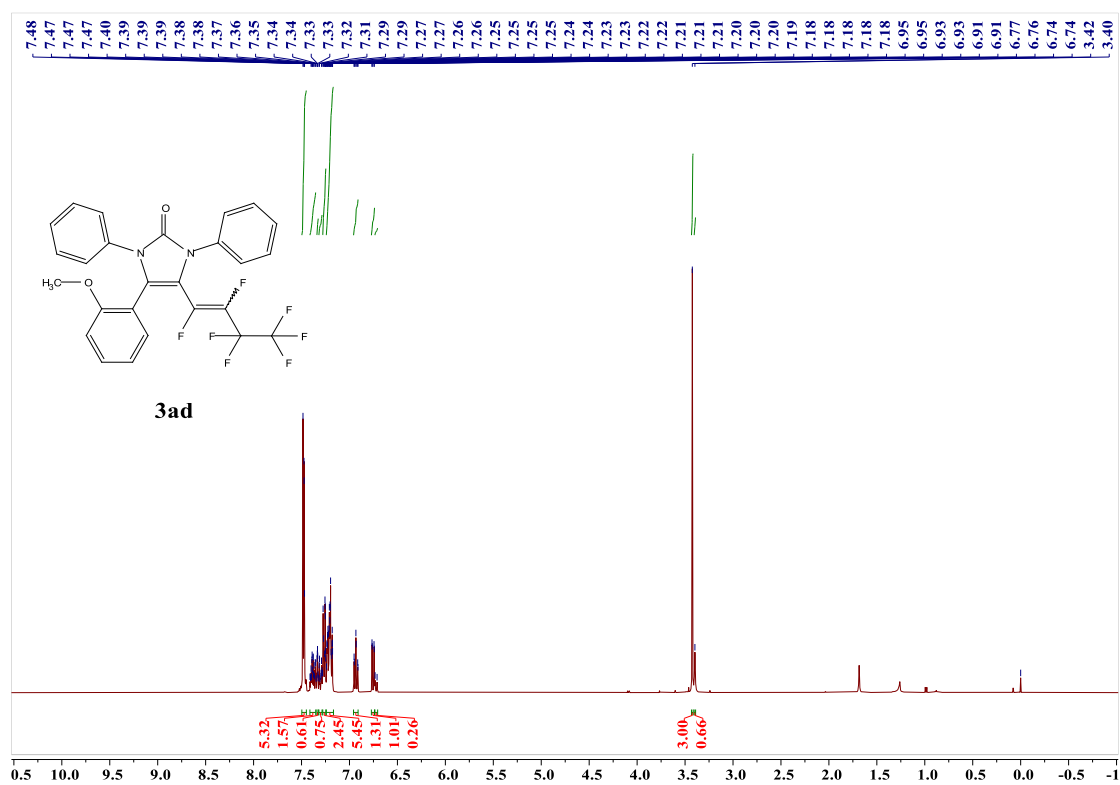

<sup>19</sup>F NMR spectra of the product **3ad** (376 MHz, CDCl<sub>3</sub>)

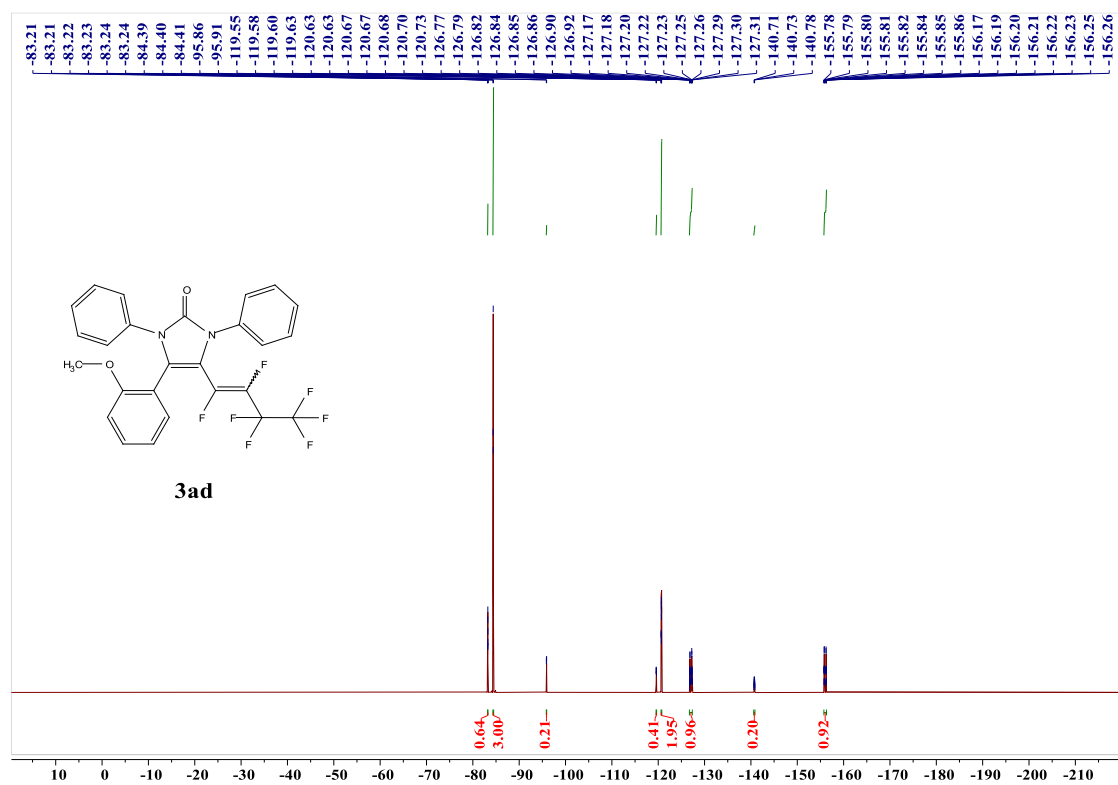

<sup>13</sup>C NMR spectra of the product **3ad** (100 MHz, CDCl<sub>3</sub>)

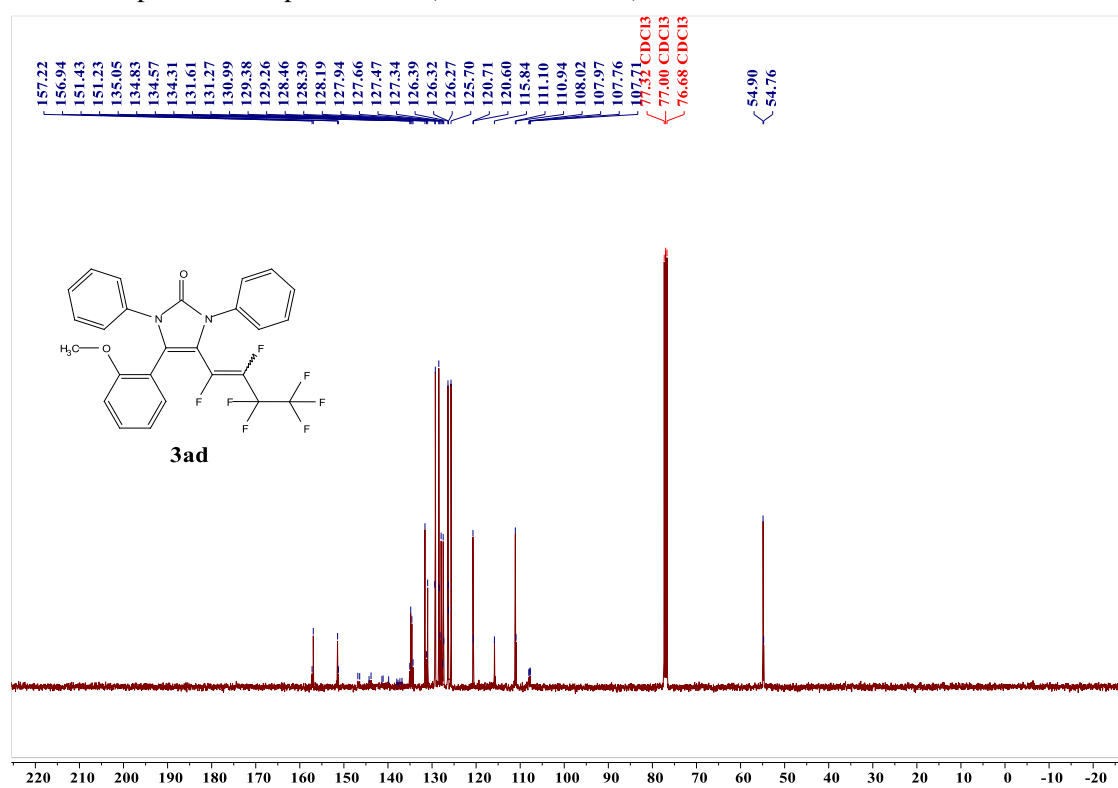

$^1\text{H}$  NMR spectra of the product **3ae** (400 MHz,  $\text{CDCl}_3$ )

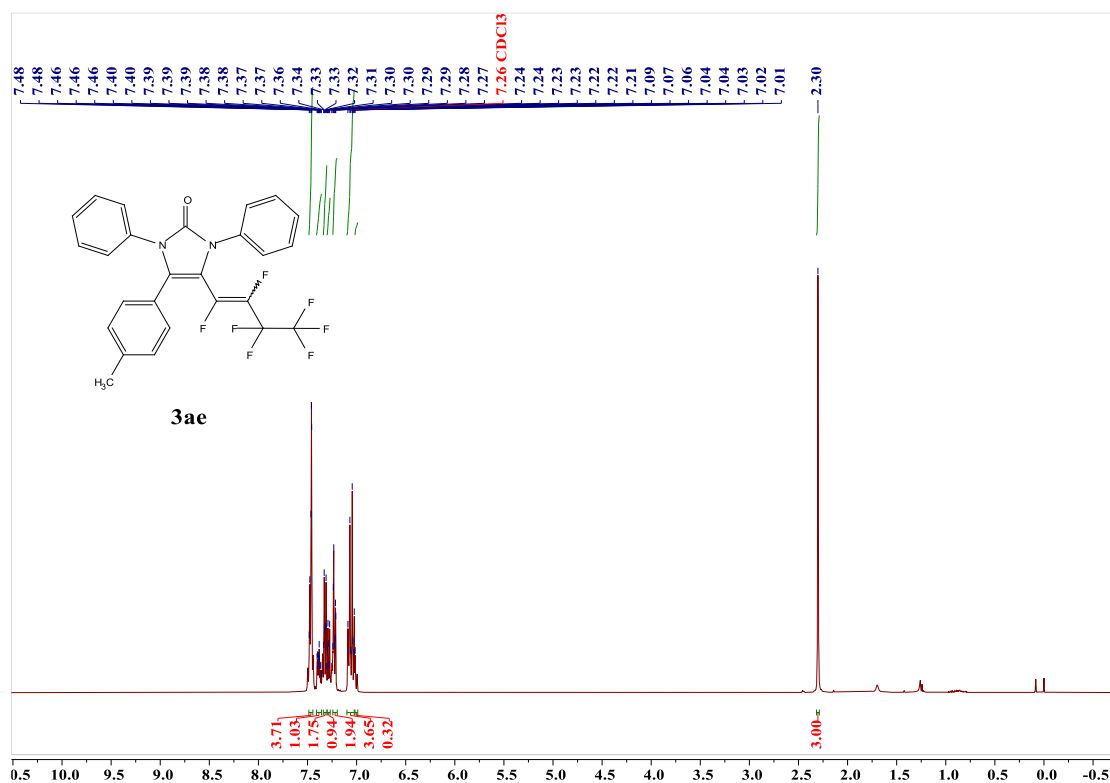

$^{19}\text{F}$  NMR spectra of the product **3ae** (376 MHz,  $\text{CDCl}_3$ )

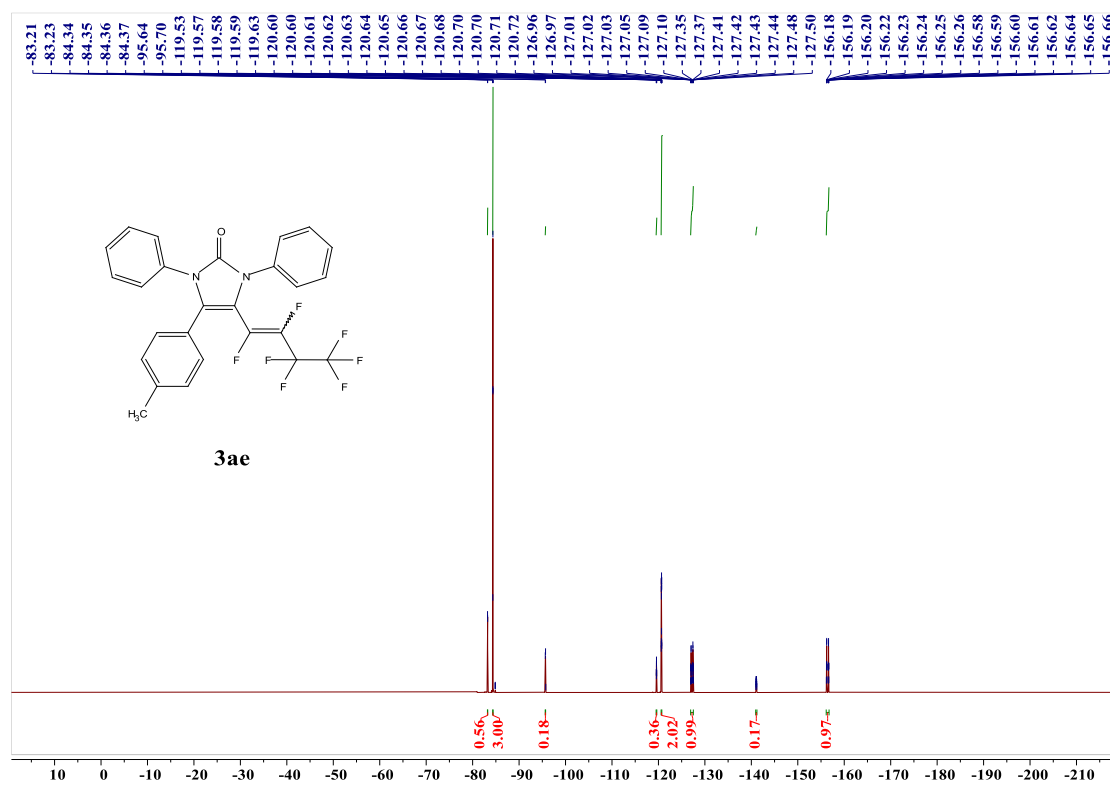

$^{13}\text{C}$  NMR spectra of the product **2e** (100 MHz,  $\text{CDCl}_3$ )

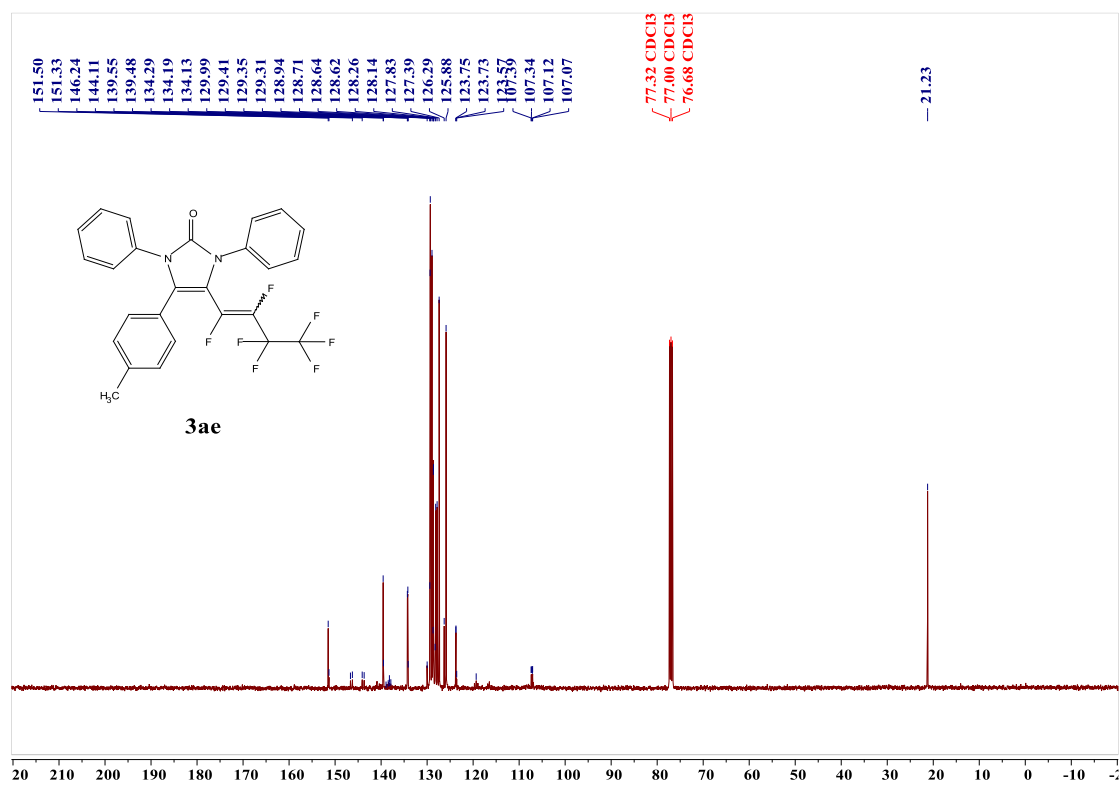

$^1\text{H}$  NMR spectra of the product **3af** (400 MHz,  $\text{CDCl}_3$ )

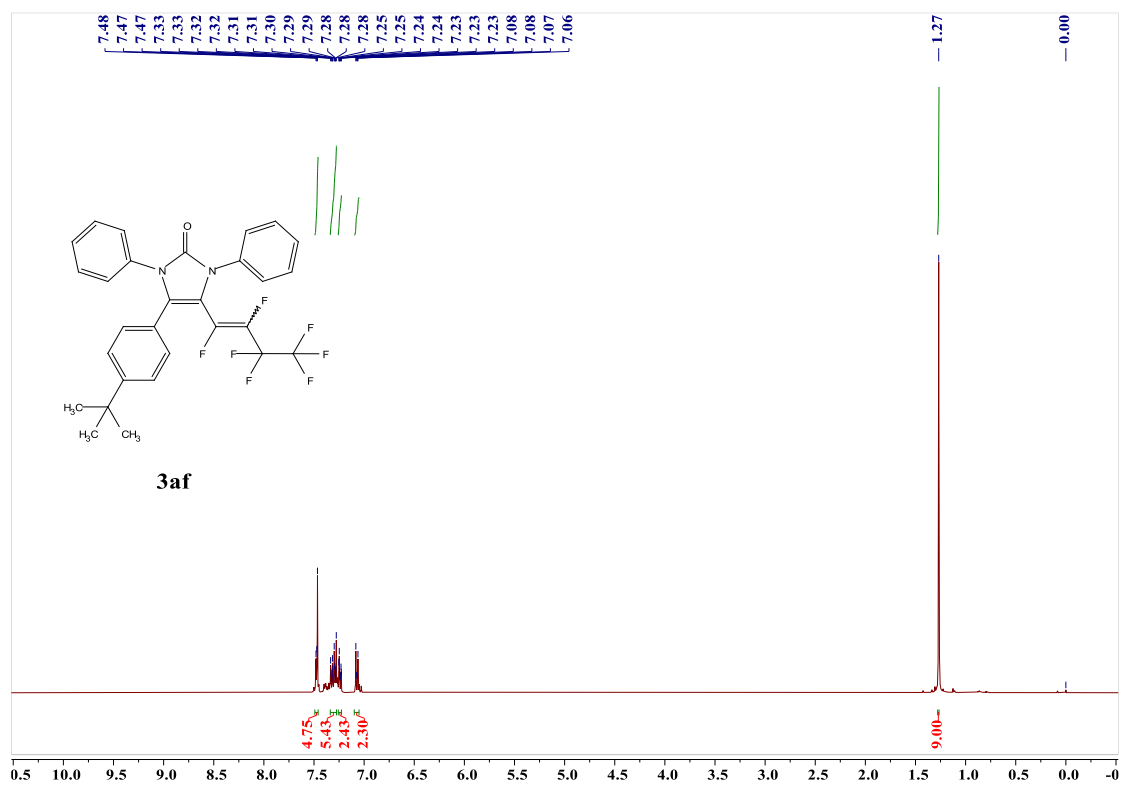

<sup>19</sup>F NMR spectra of the product **3af** (376 MHz, CDCl<sub>3</sub>)

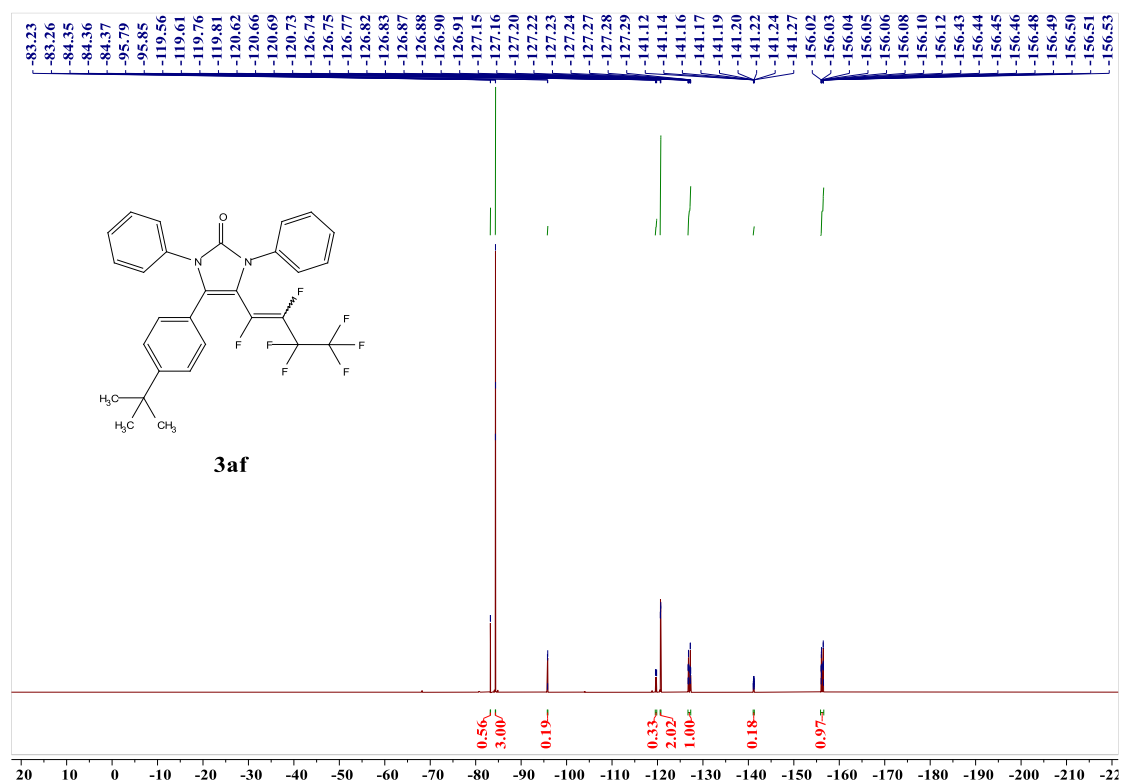

<sup>13</sup>C NMR spectra of the product **3af** (100 MHz, CDCl<sub>3</sub>)

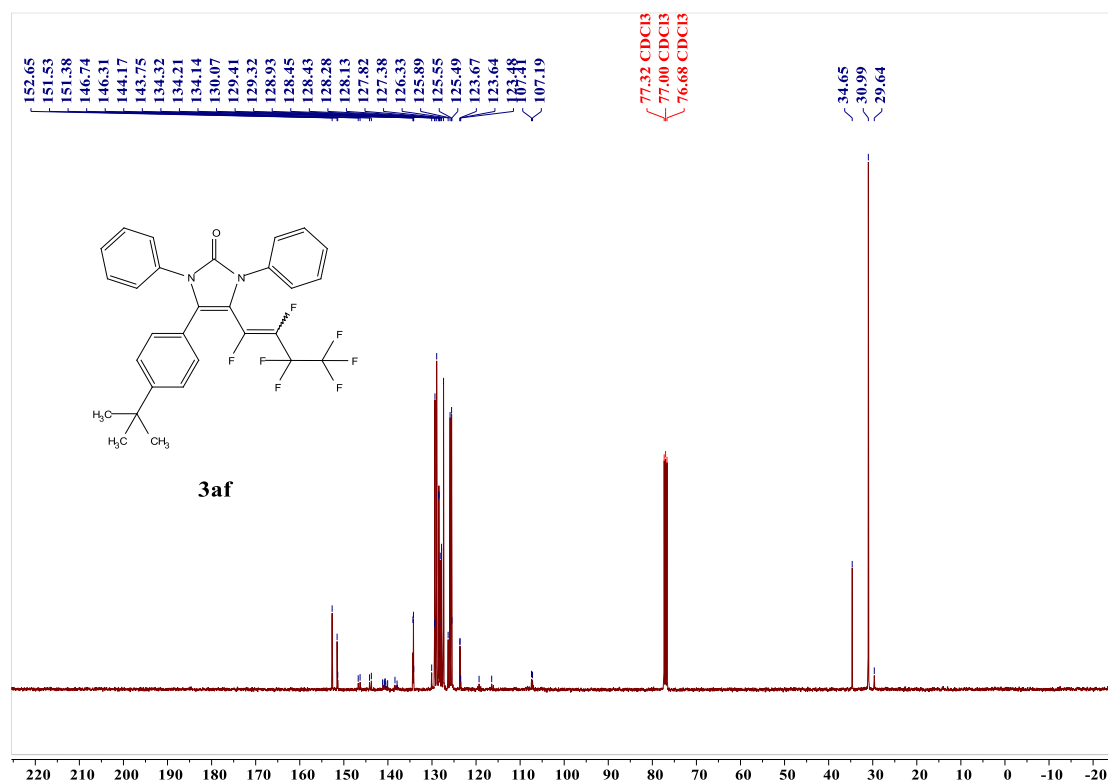



<sup>1</sup>H NMR spectra of the product **3ag** (400 MHz, CDCl<sub>3</sub>)

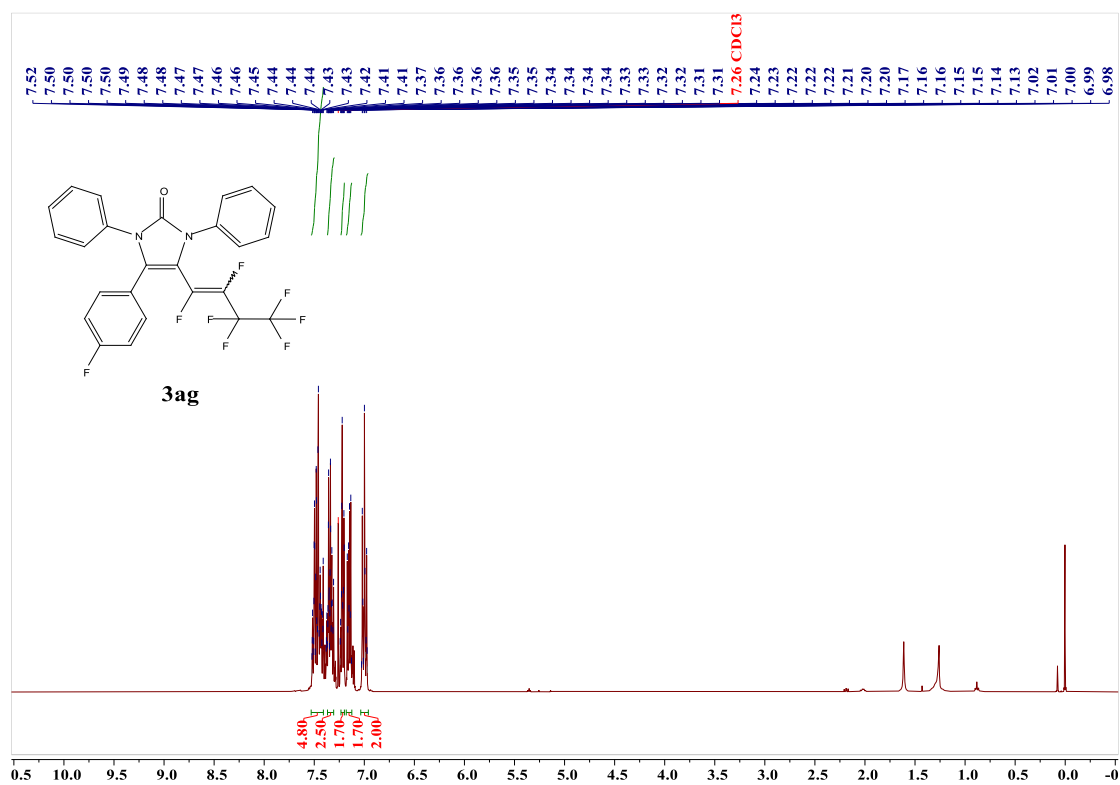

<sup>19</sup>F NMR spectra of the product **3ag** (376 MHz, CDCl<sub>3</sub>)

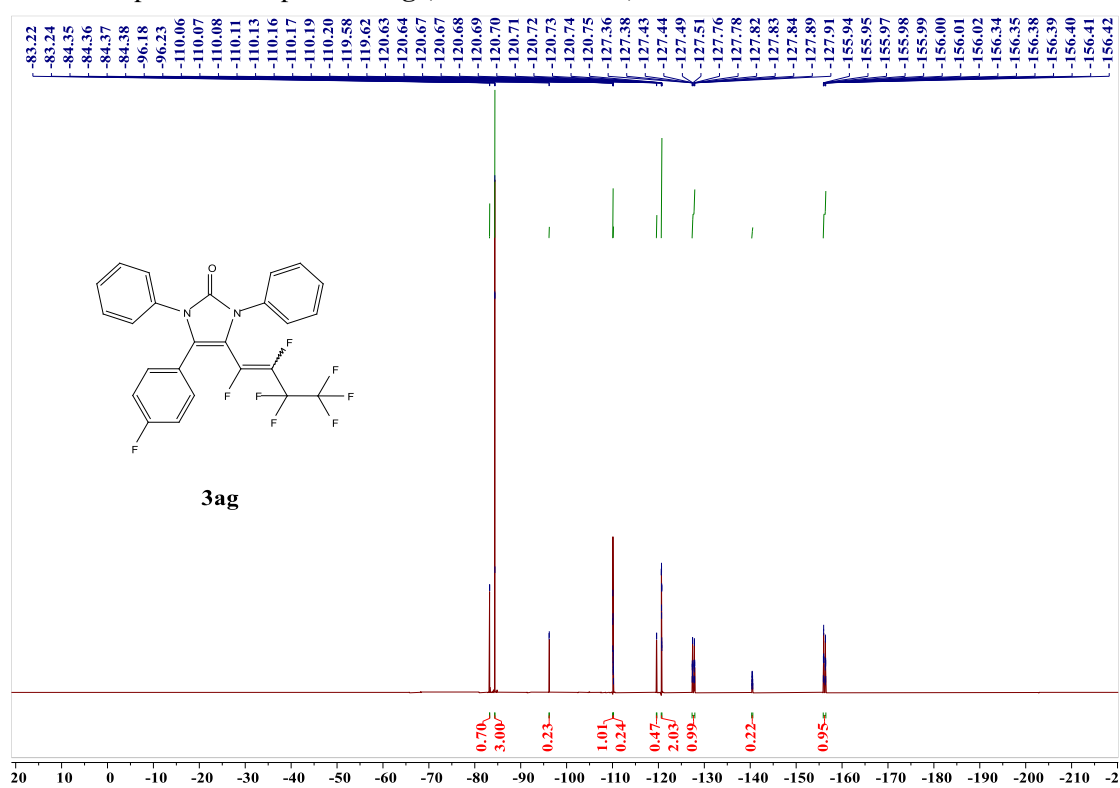

$^{13}\text{C}$  NMR spectra of the product **3ag** (100 MHz,  $\text{CDCl}_3$ )

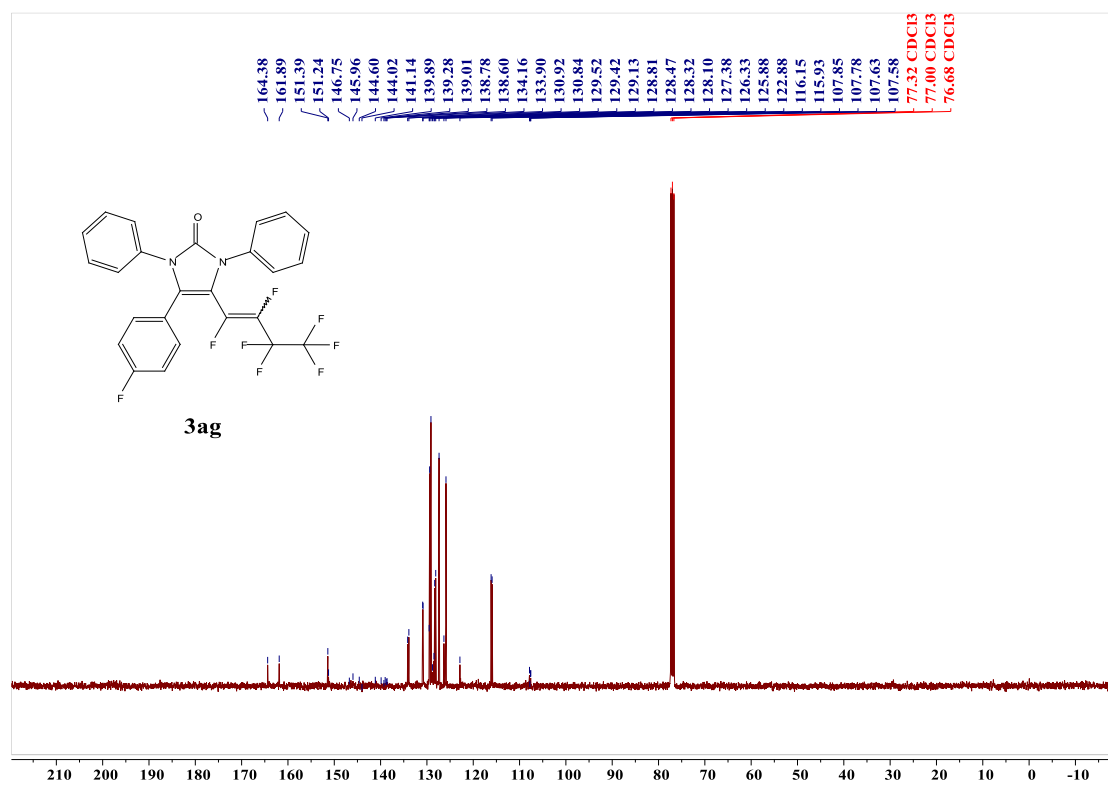

$^1\text{H}$  NMR spectra of the product **3ah** (400 MHz,  $\text{CDCl}_3$ )

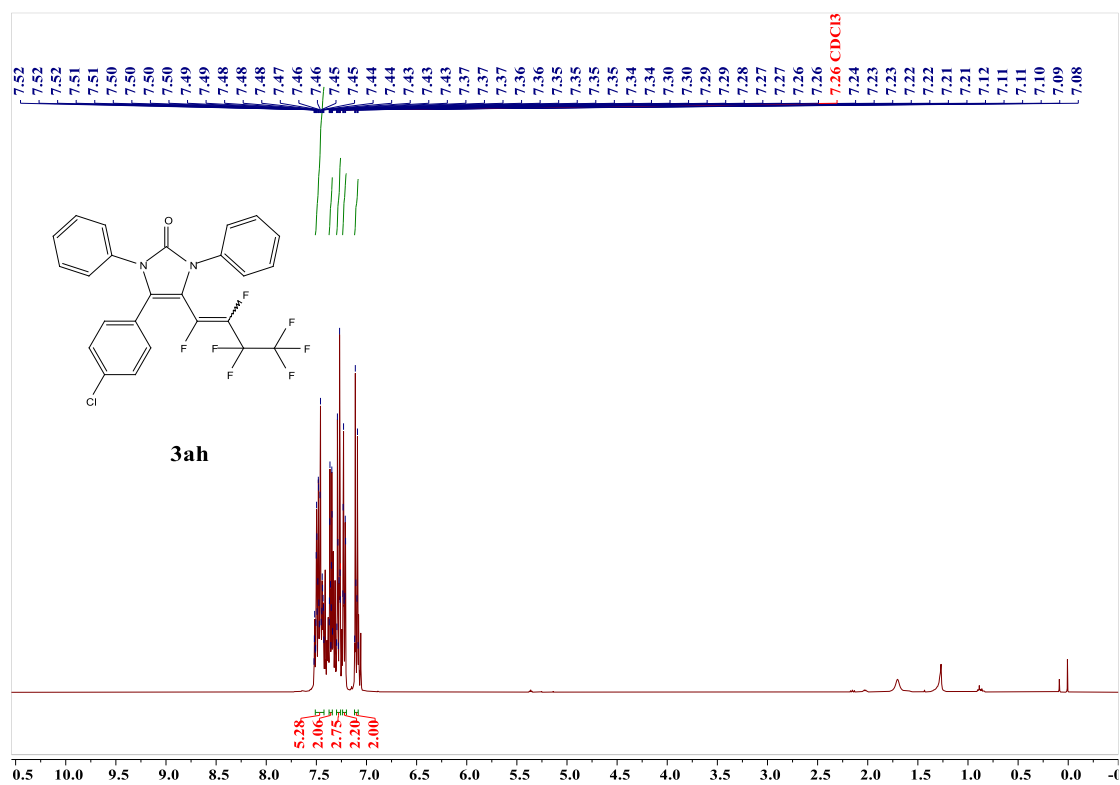

$^{19}\text{F}$  NMR spectra of the product **3ah** (376 MHz,  $\text{CDCl}_3$ )

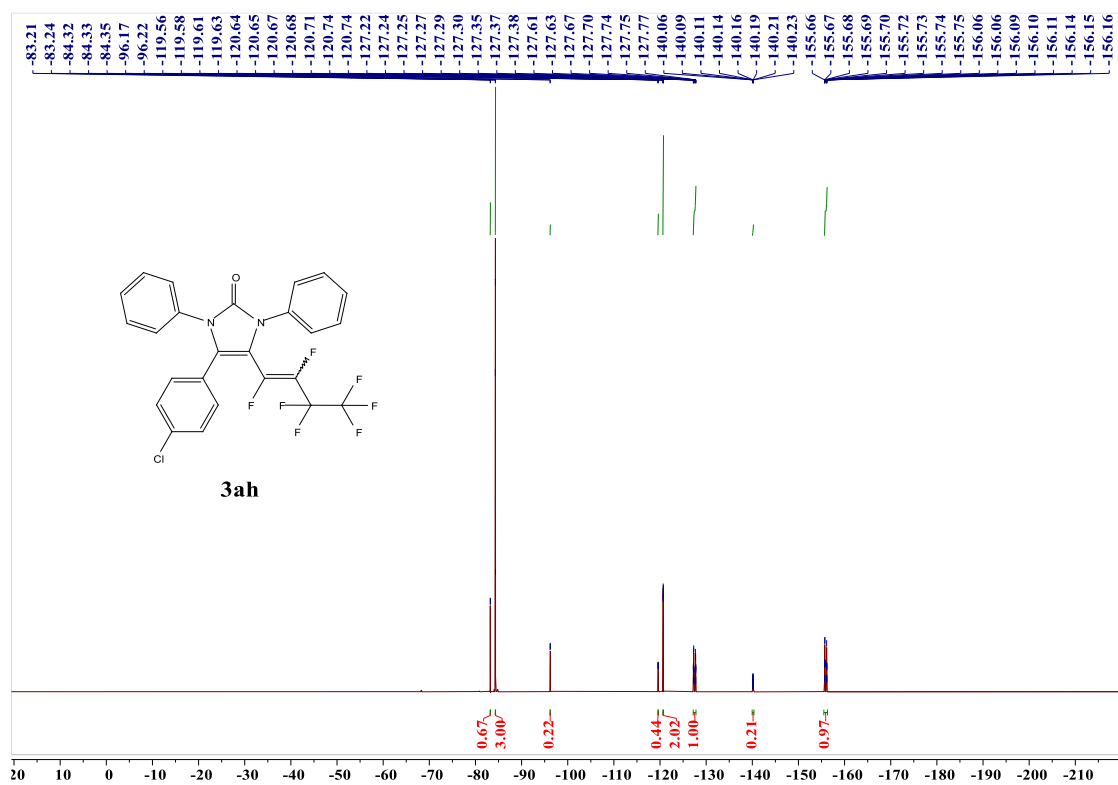

$^{13}\text{C}$  NMR spectra of the product **3ah** (100 MHz,  $\text{CDCl}_3$ )

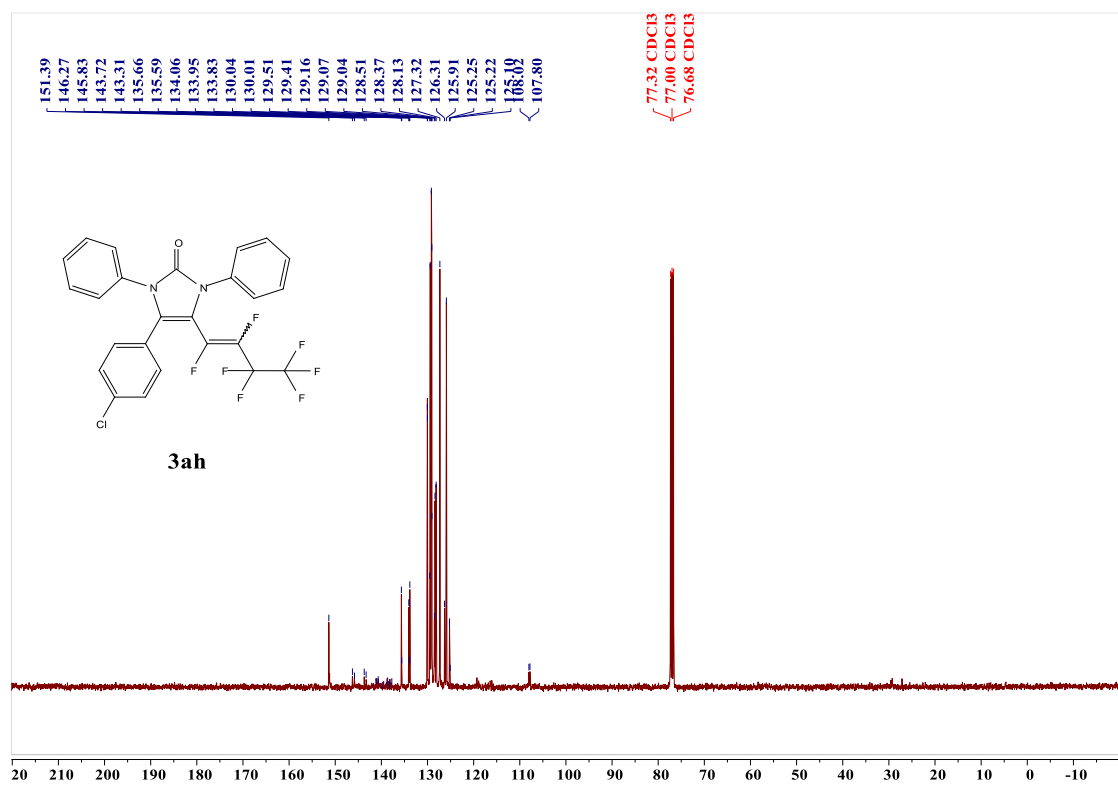

<sup>1</sup>H NMR spectra of the product **3ai** (400 MHz, CDCl<sub>3</sub>)

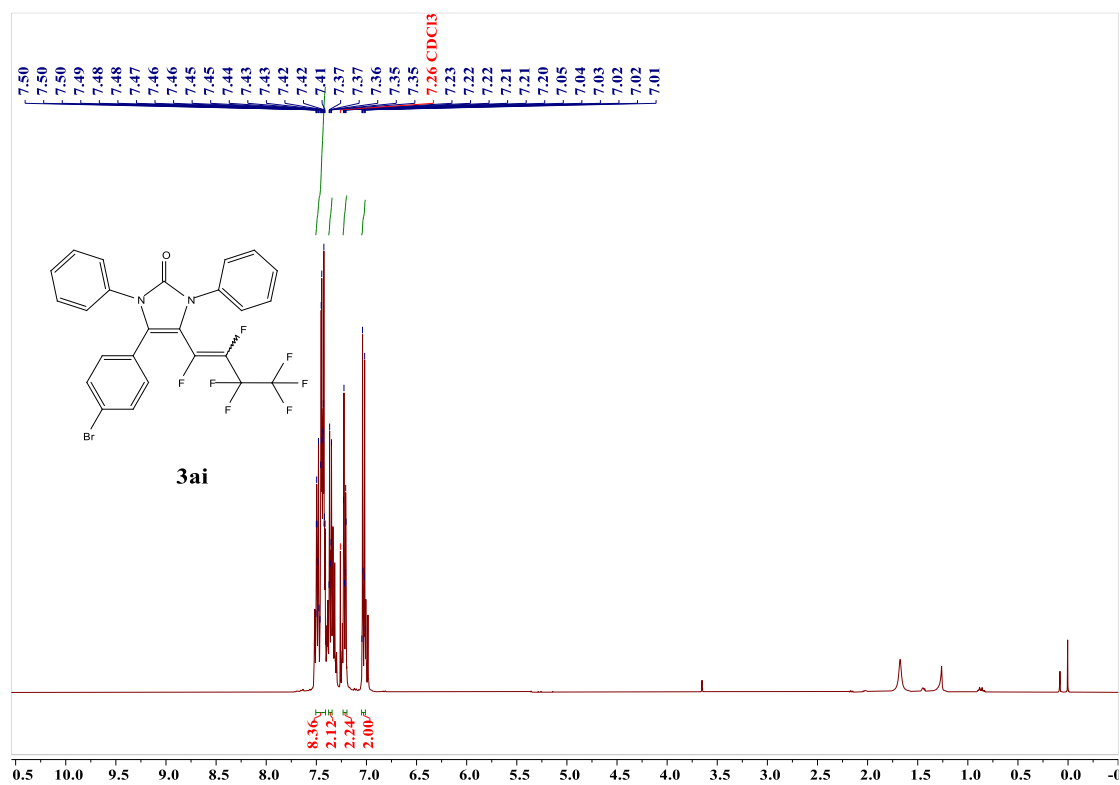

<sup>19</sup>F NMR spectra of the product **3ai** (376 MHz, CDCl<sub>3</sub>)

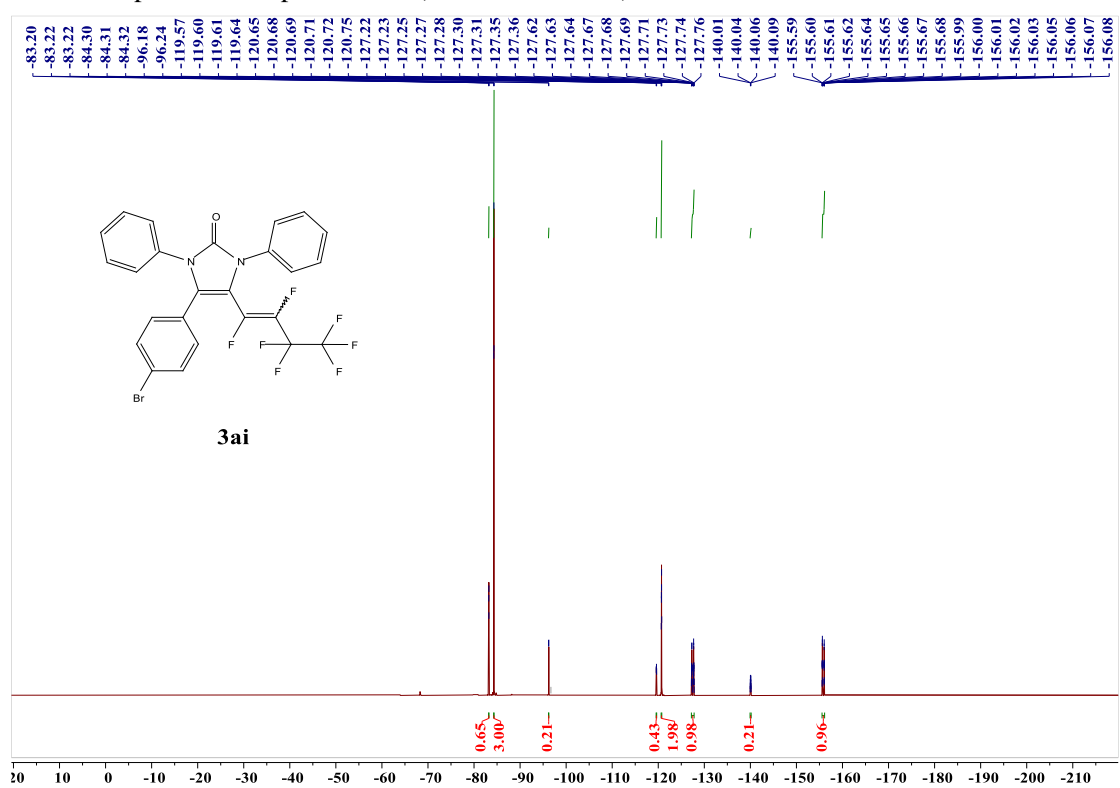

$^{13}\text{C}$  NMR spectra of the product **3ai** (100 MHz,  $\text{CDCl}_3$ )

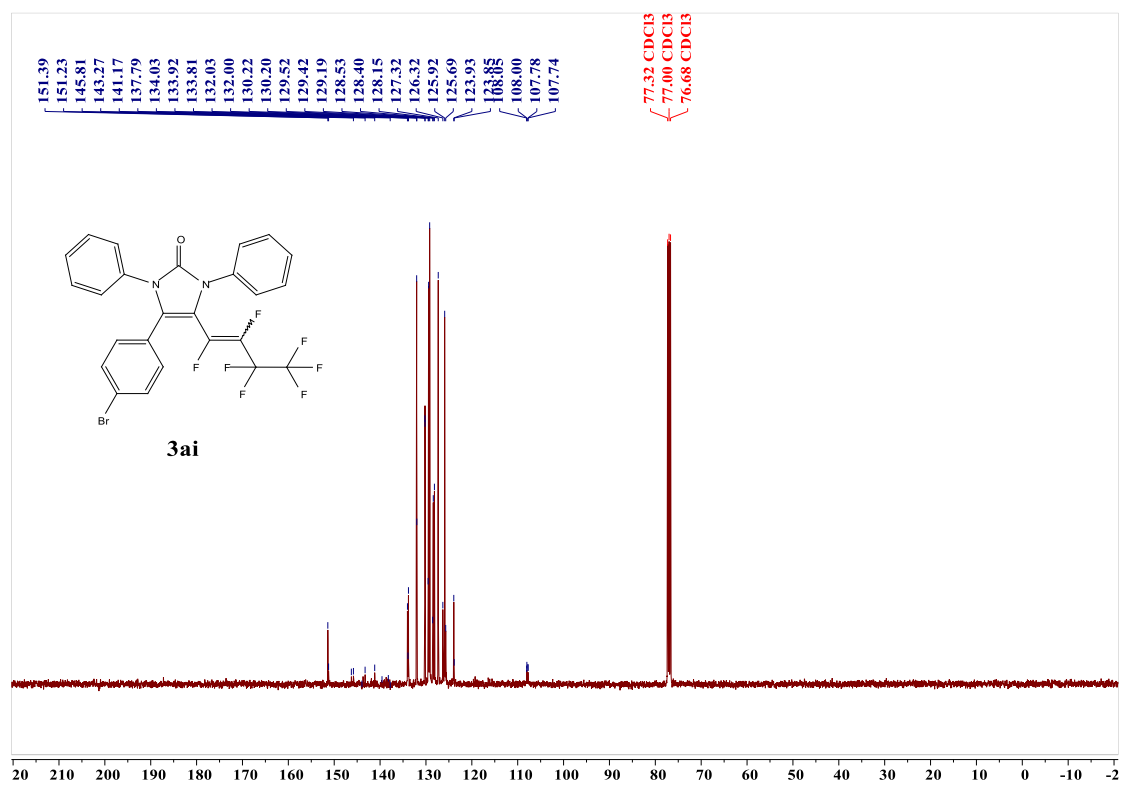

$^1\text{H}$  NMR spectra of the product **3aj** (400 MHz,  $\text{CDCl}_3$ )

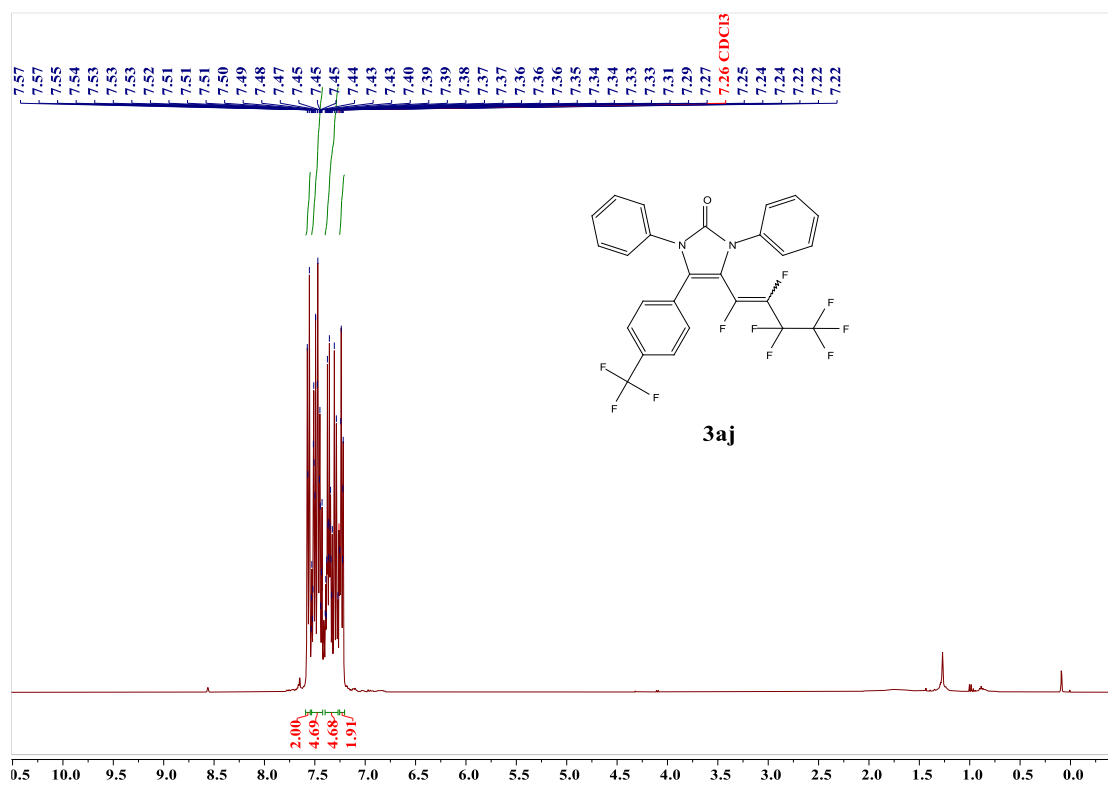

<sup>19</sup>F NMR spectra of the product **3aj** (376 MHz, CDCl<sub>3</sub>)

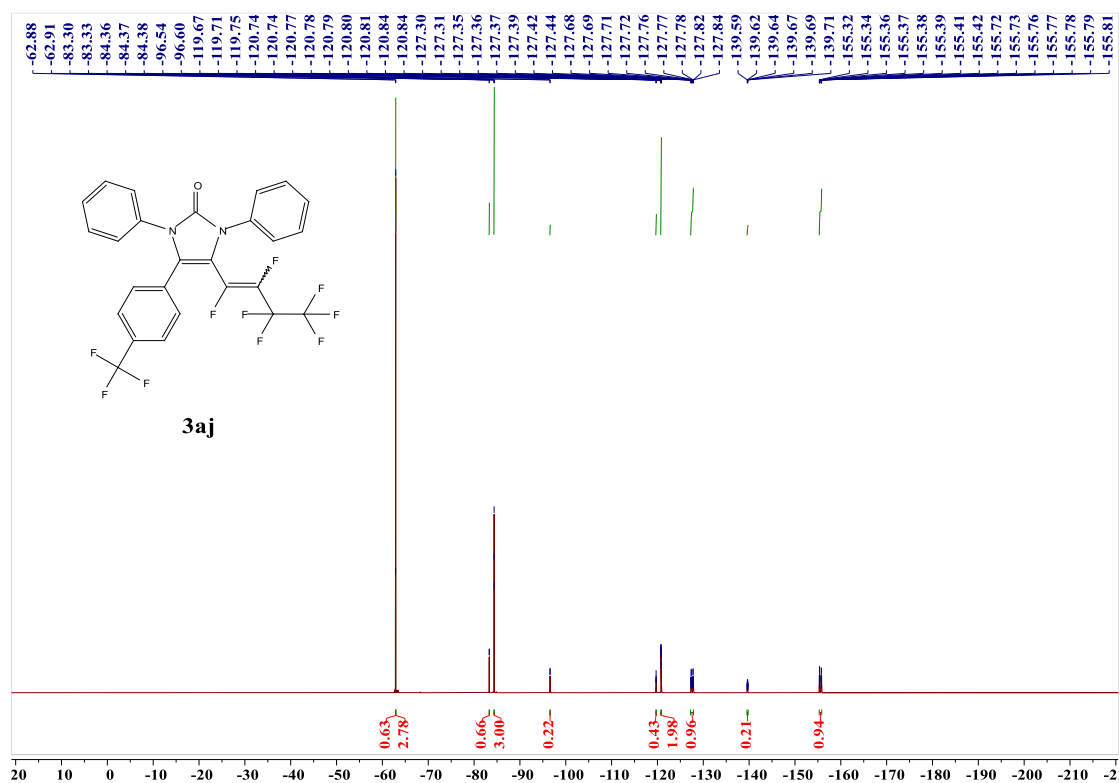

<sup>13</sup>C NMR spectra of the product **3aj** (100 MHz, CDCl<sub>3</sub>)

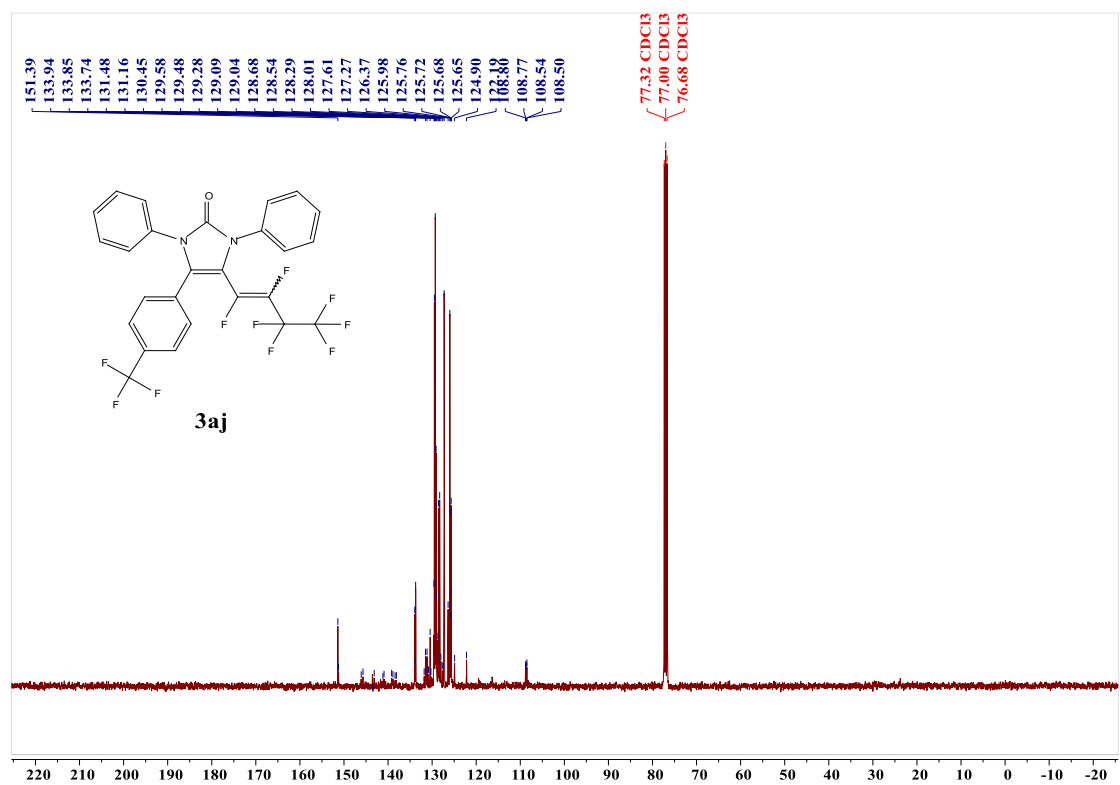

<sup>1</sup>H NMR spectra of the product **3ak** (400 MHz, CDCl<sub>3</sub>)

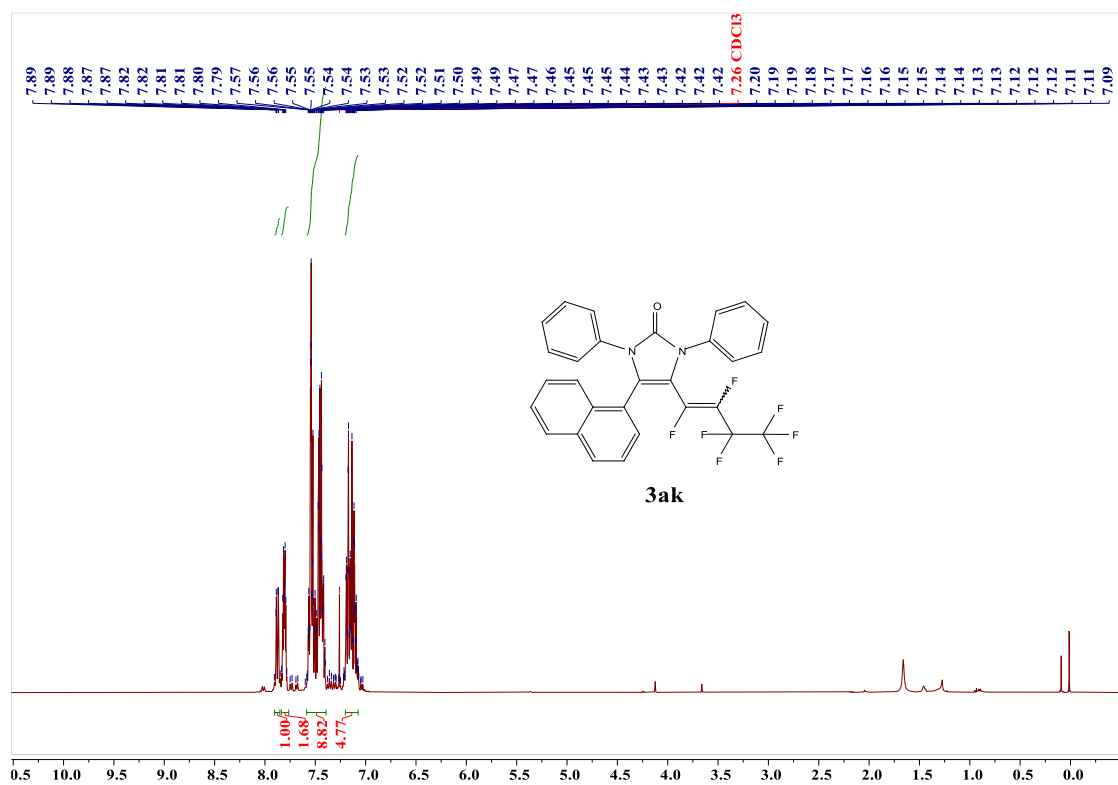

<sup>19</sup>F NMR spectra of the product **2k** (376 MHz, CDCl<sub>3</sub>)

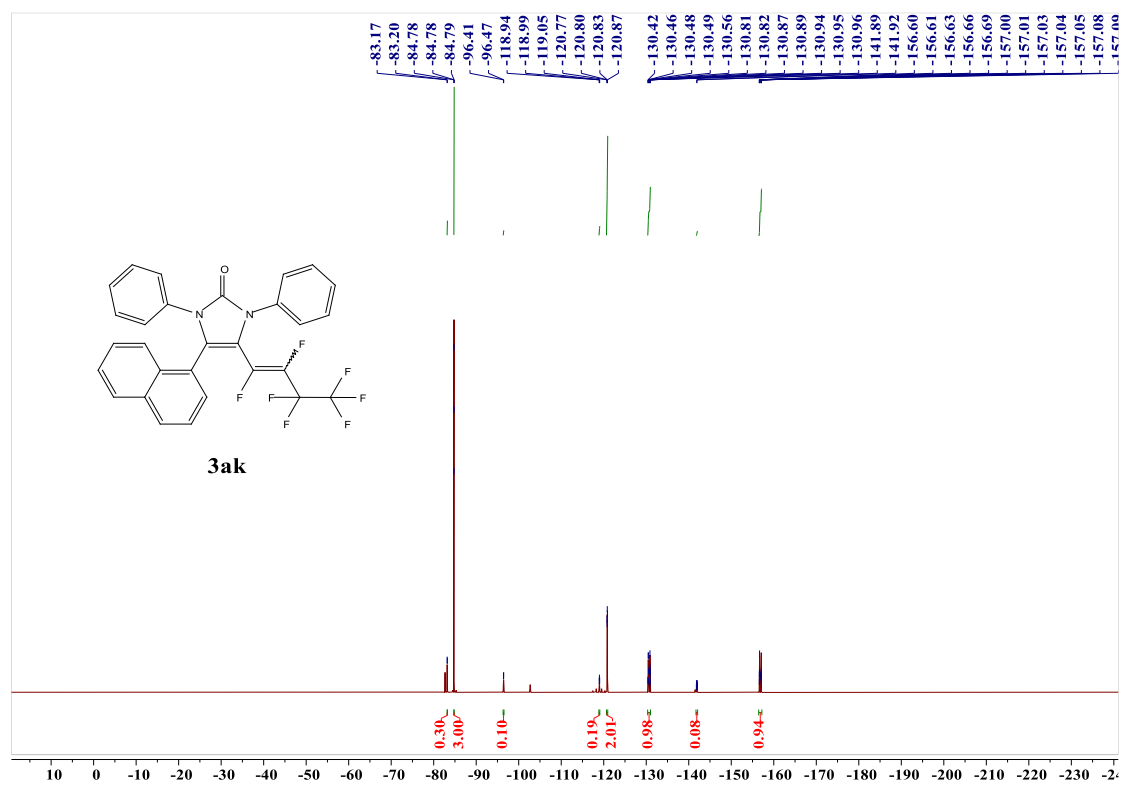

$^{13}\text{C}$  NMR spectra of the product **3ak** (100 MHz,  $\text{CDCl}_3$ )

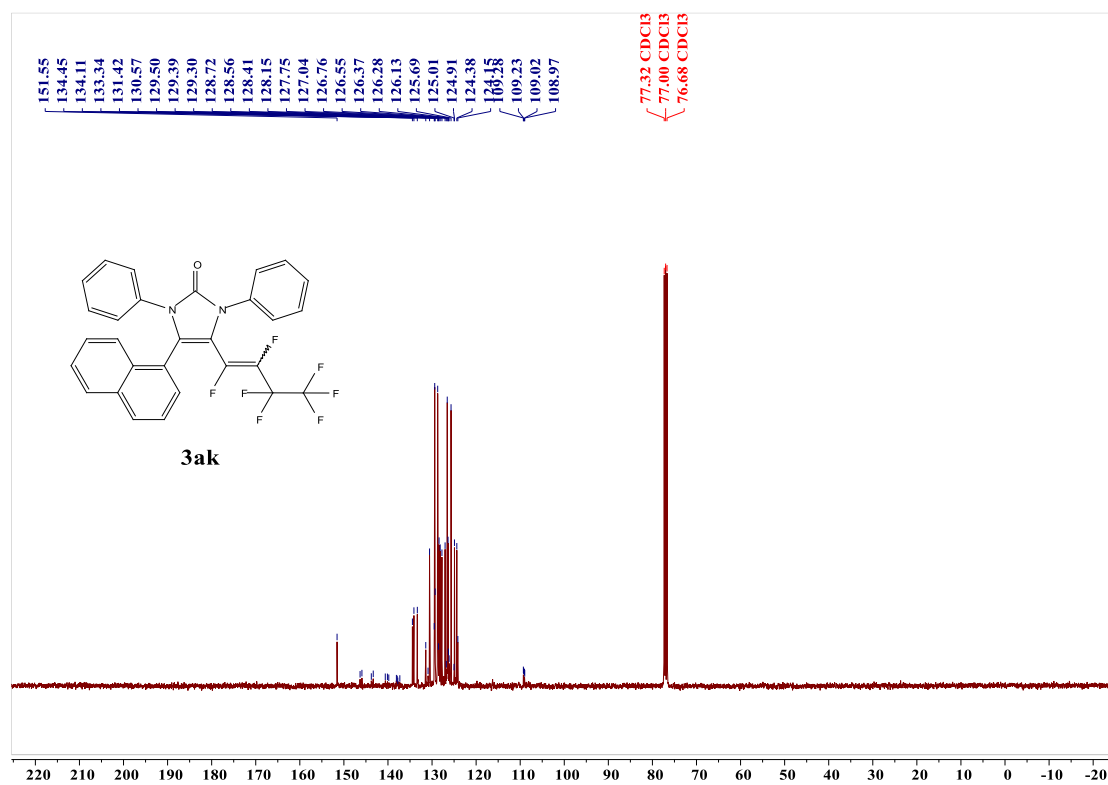

$^1\text{H}$  NMR spectra of the product **3al** (400 MHz,  $\text{CDCl}_3$ )

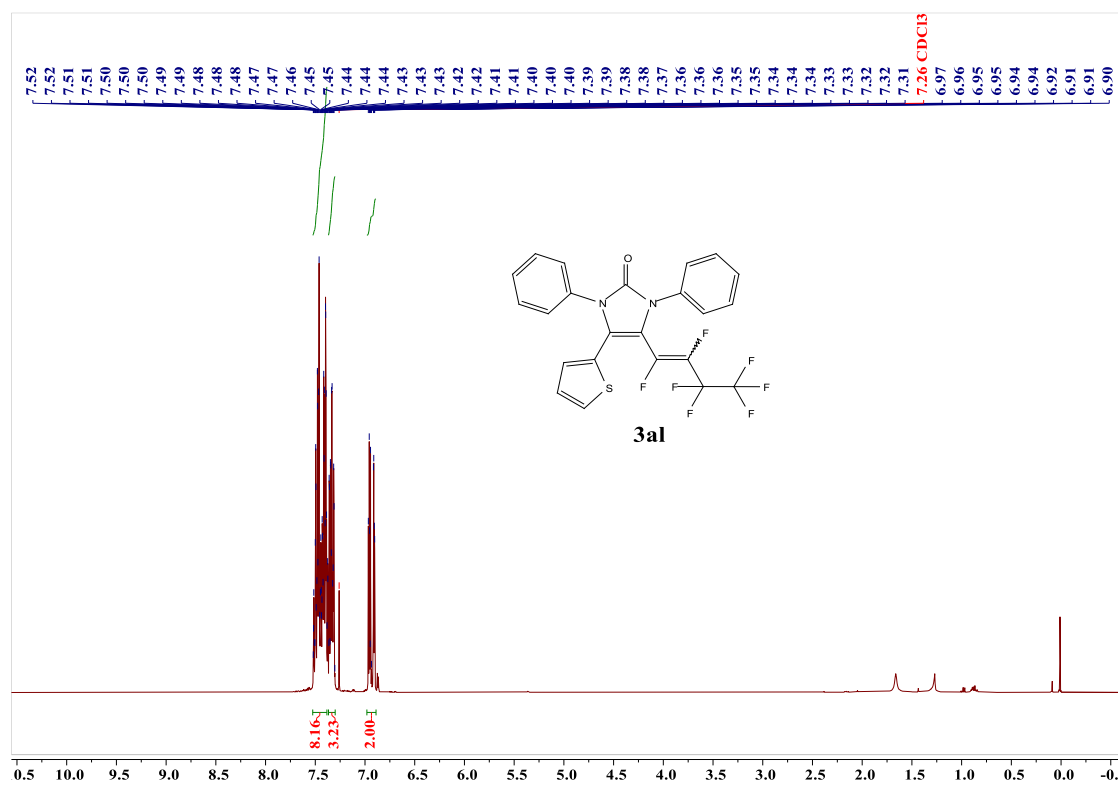



<sup>19</sup>F NMR spectra of the product **3al** (376 MHz, CDCl<sub>3</sub>)

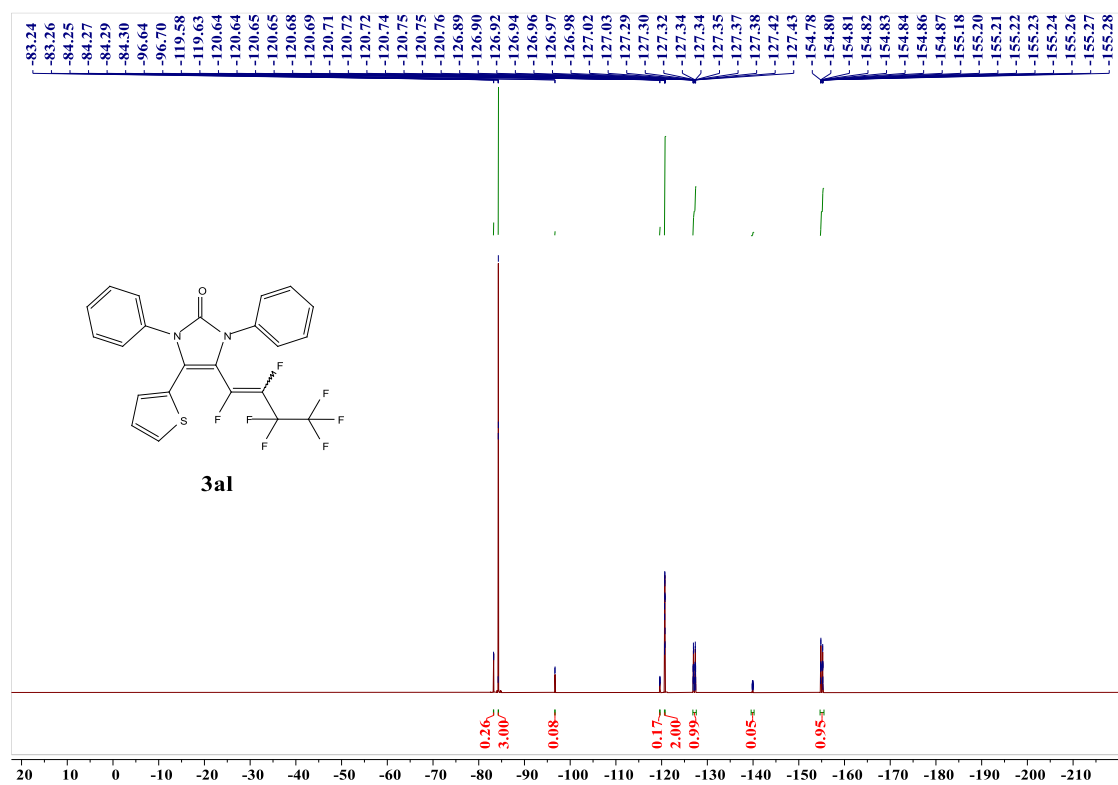

<sup>13</sup>C NMR spectra of the product **3al** (100 MHz, CDCl<sub>3</sub>)

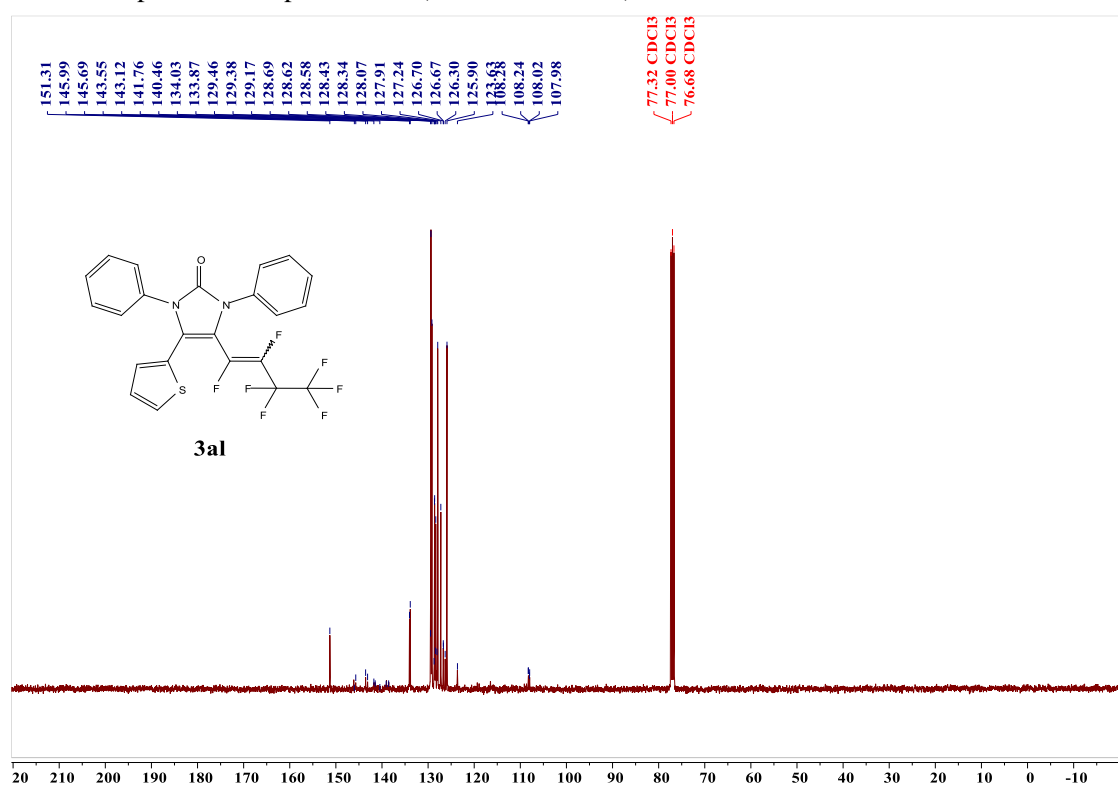

<sup>1</sup>H NMR spectra of the product **3am** (400 MHz, CDCl<sub>3</sub>)

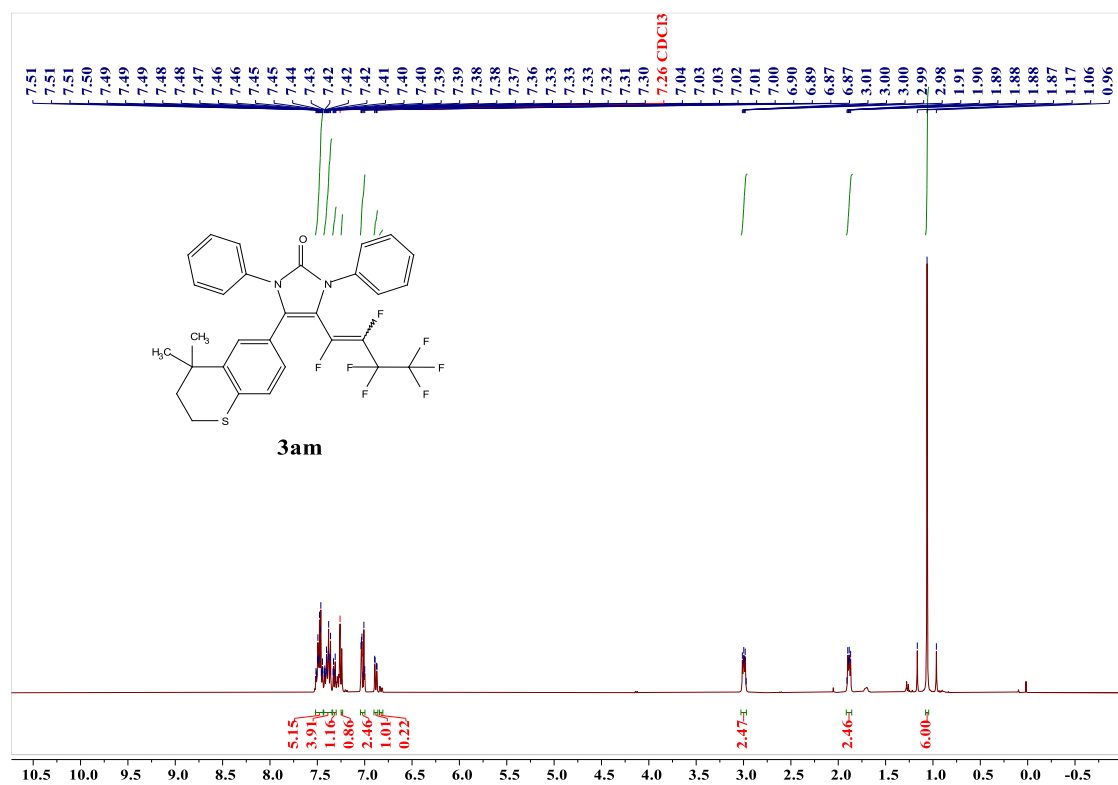

<sup>19</sup>F NMR spectra of the product **3am** (376 MHz, CDCl<sub>3</sub>)

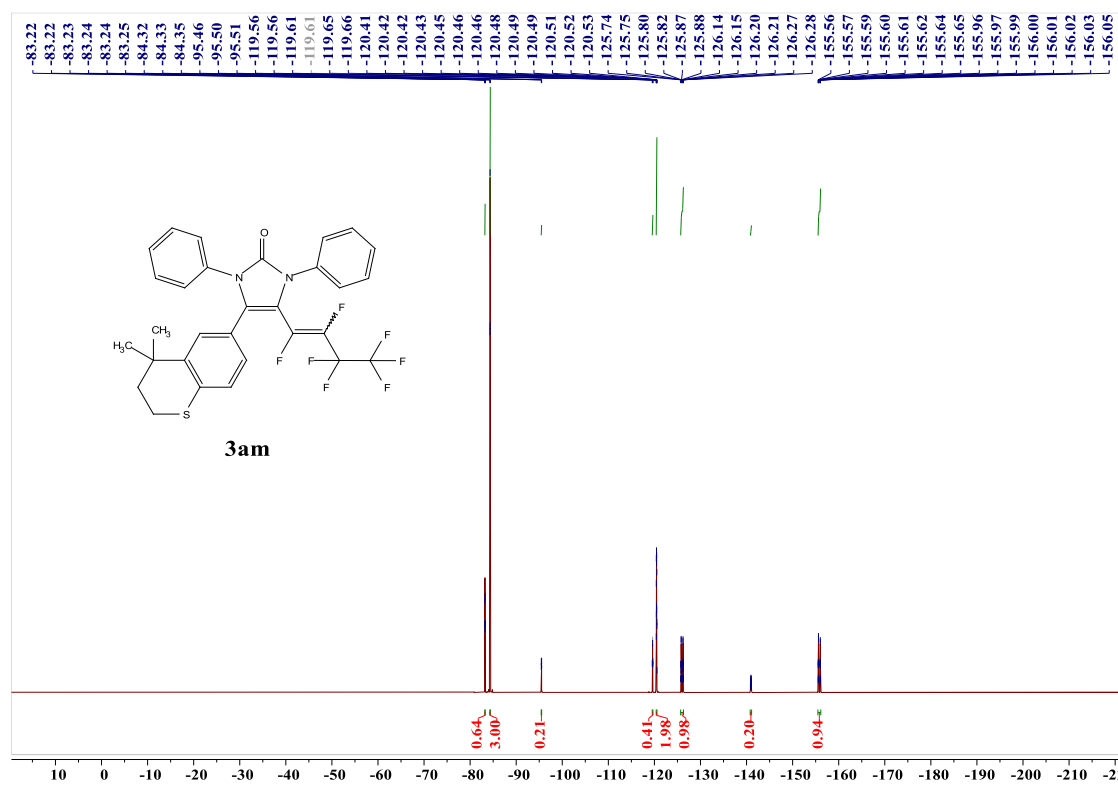

$^{13}\text{C}$  NMR spectra of the product **3am** (100 MHz,  $\text{CDCl}_3$ )

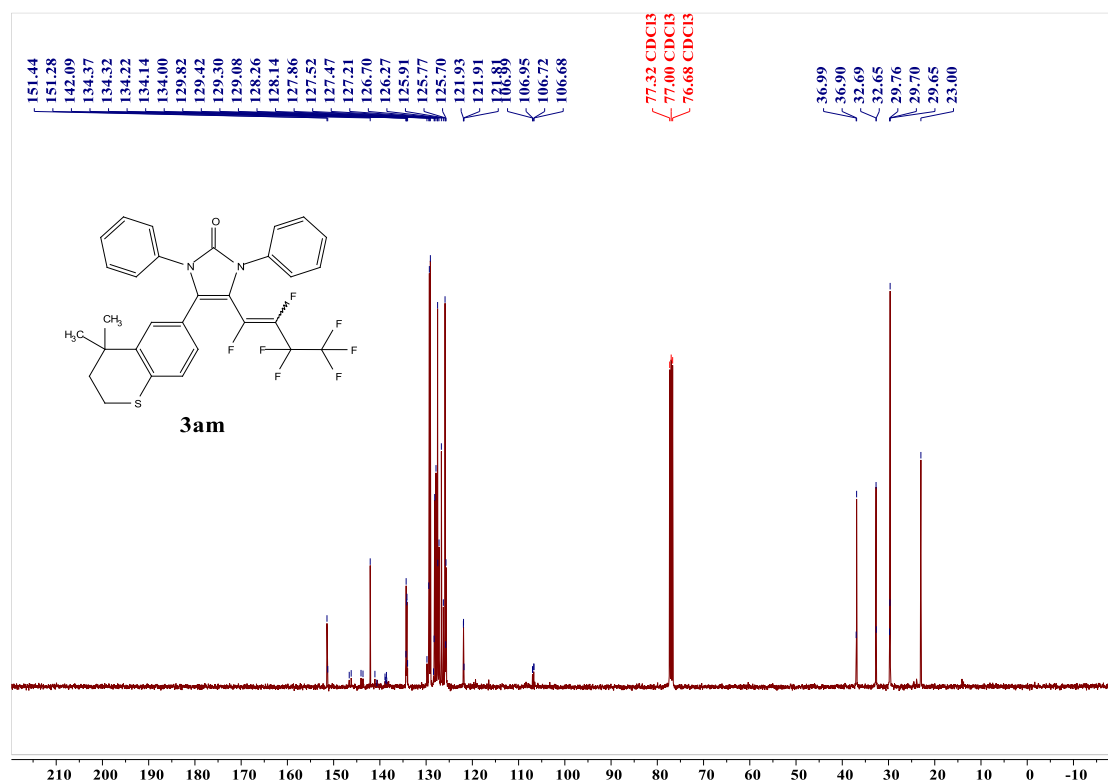

$^1\text{H}$  NMR spectra of the product **3an** (400 MHz,  $\text{CDCl}_3$ )

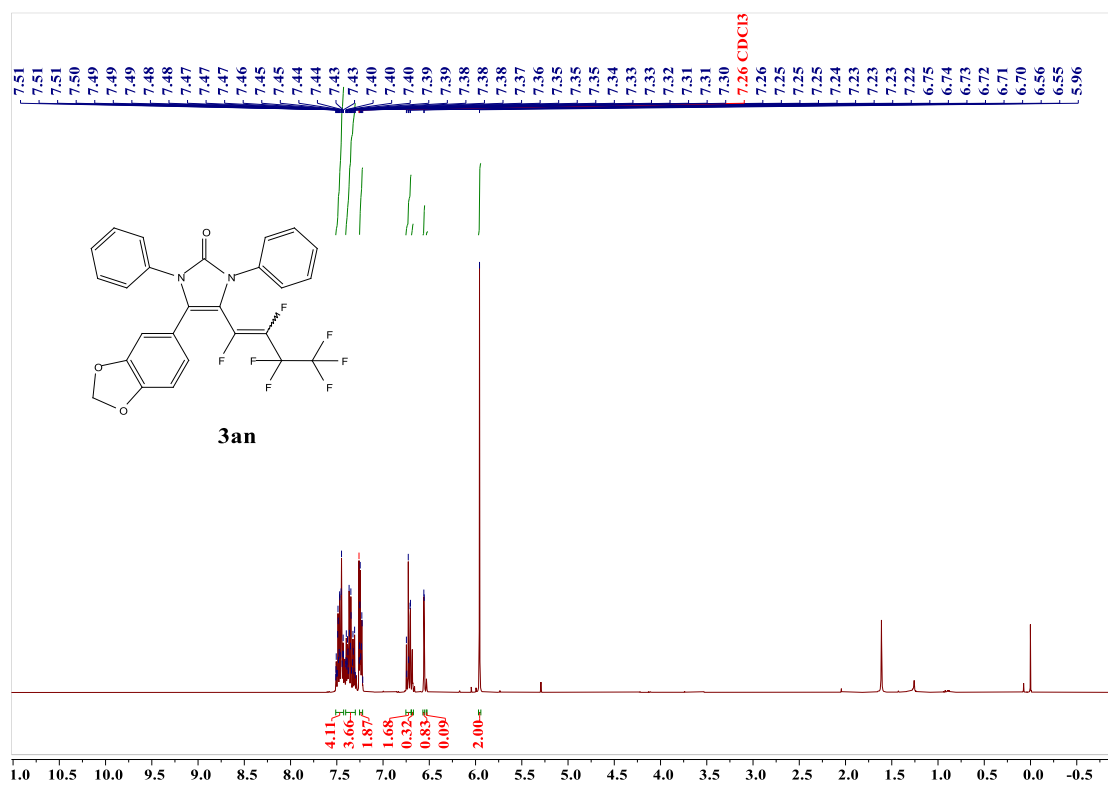



$^1\text{H}$  NMR spectra of the product **3ar** (400 MHz,  $\text{CDCl}_3$ )

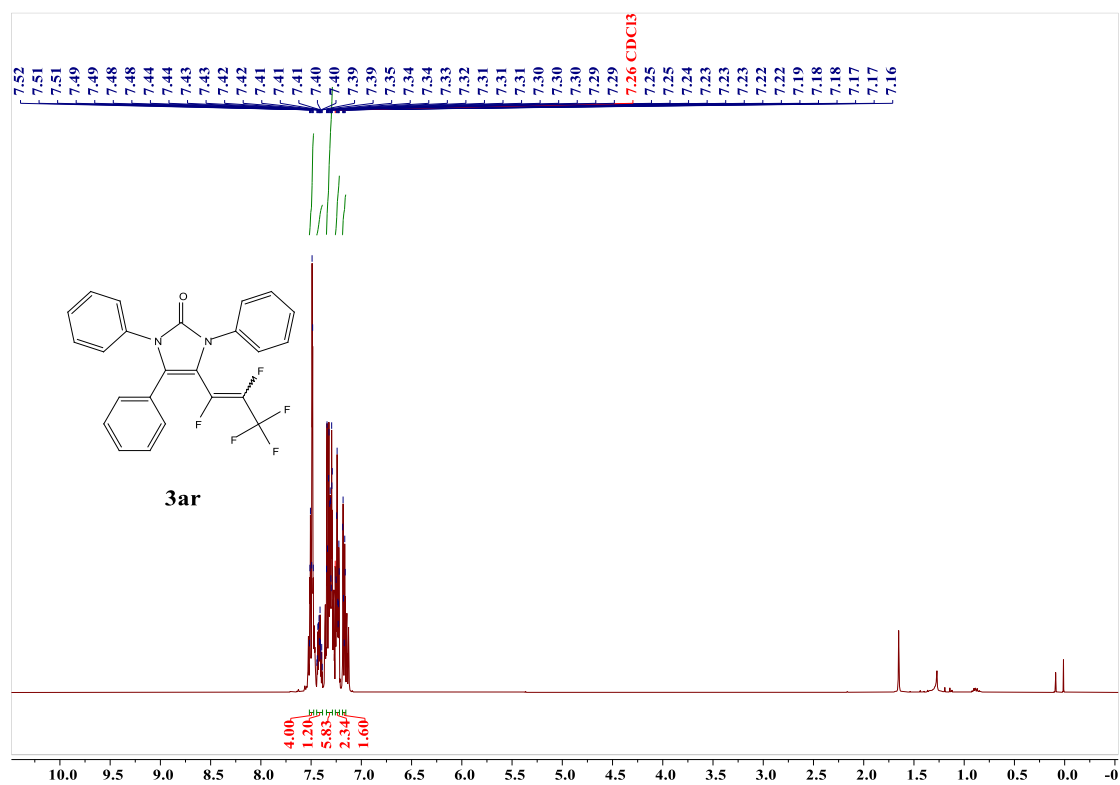

$^{19}\text{F}$  NMR spectra of the product **3ar** (376 MHz,  $\text{CDCl}_3$ )

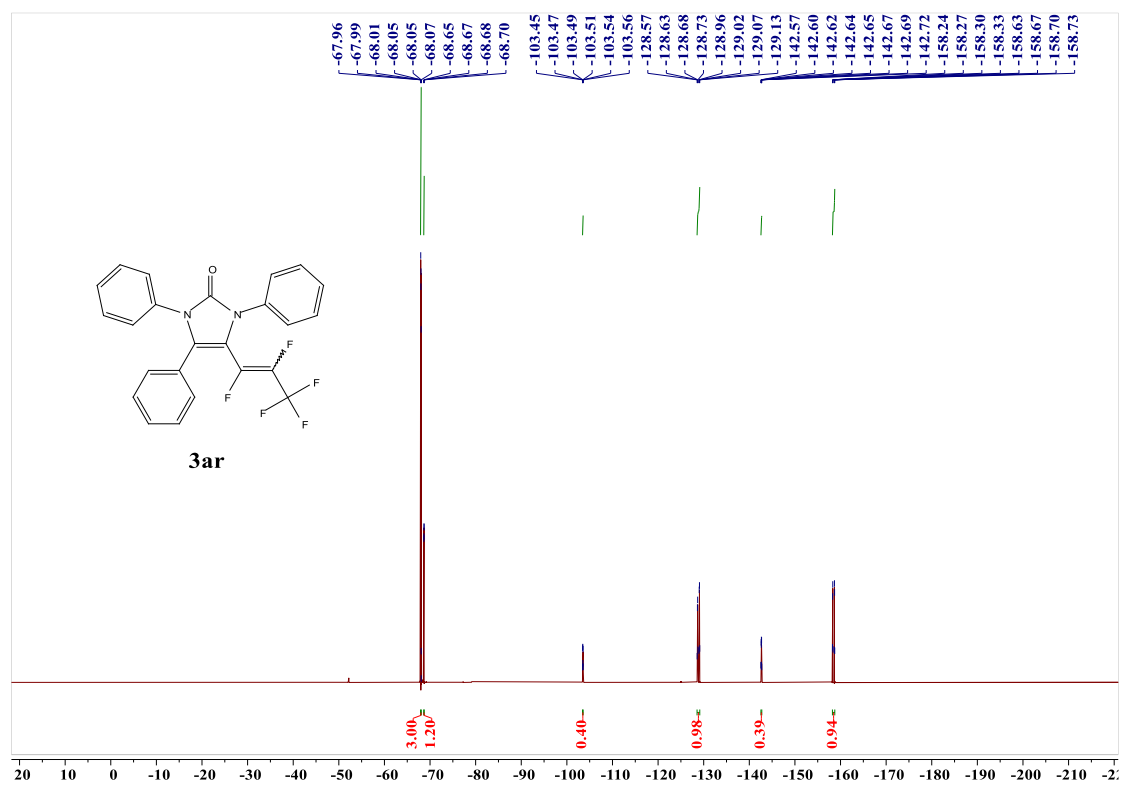

$^{13}\text{C}$  NMR spectra of the product **2o** (100 MHz,  $\text{CDCl}_3$ )

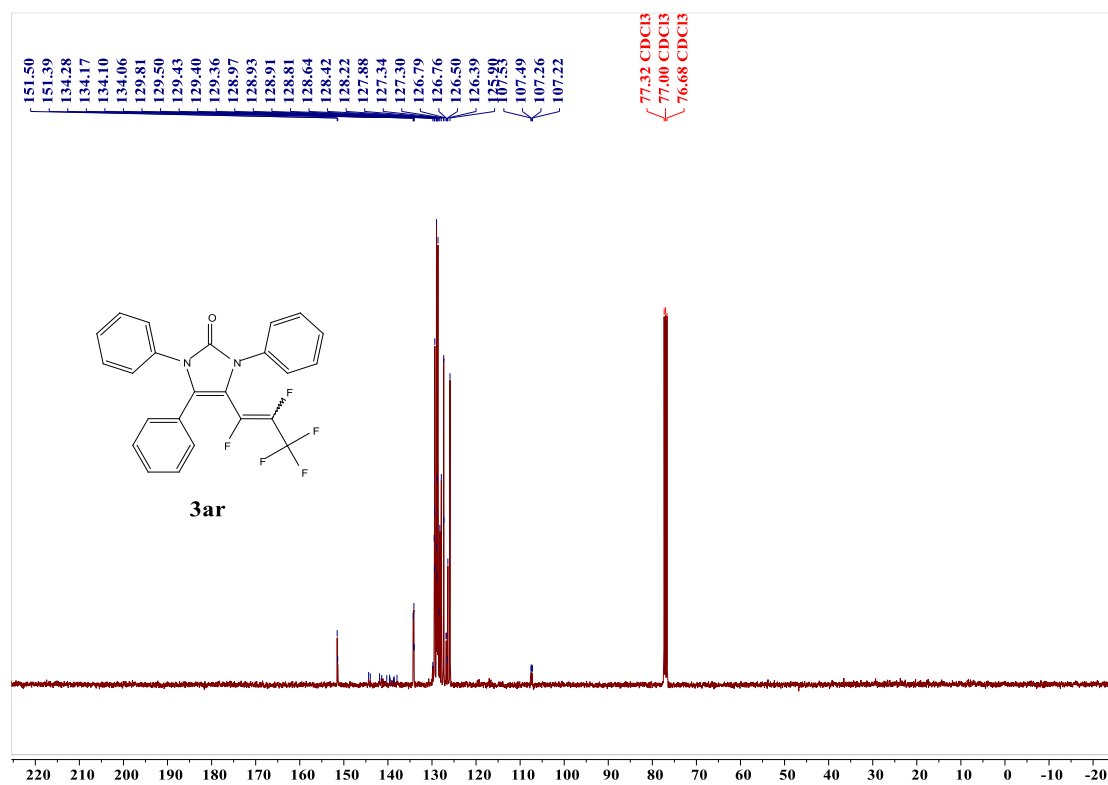

$^1\text{H}$  NMR spectra of the product **3as** (400 MHz,  $\text{CDCl}_3$ )

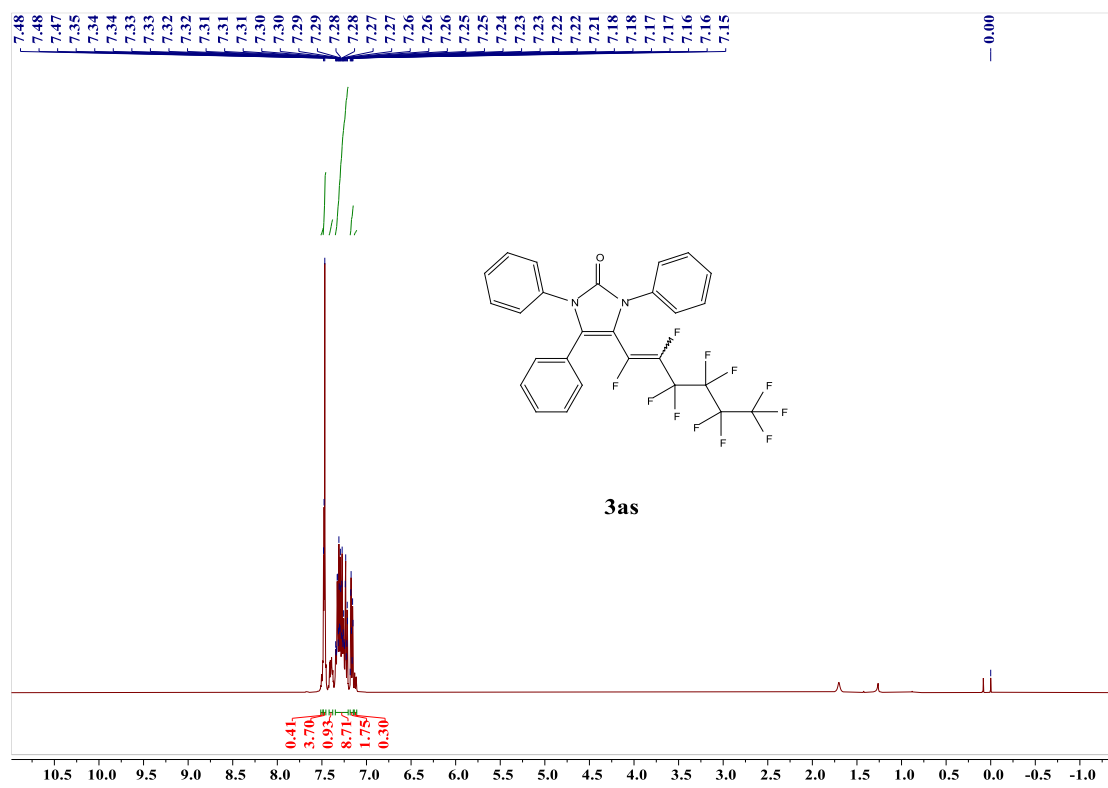

<sup>19</sup>F NMR spectra of the product **3as** (376 MHz, CDCl<sub>3</sub>)

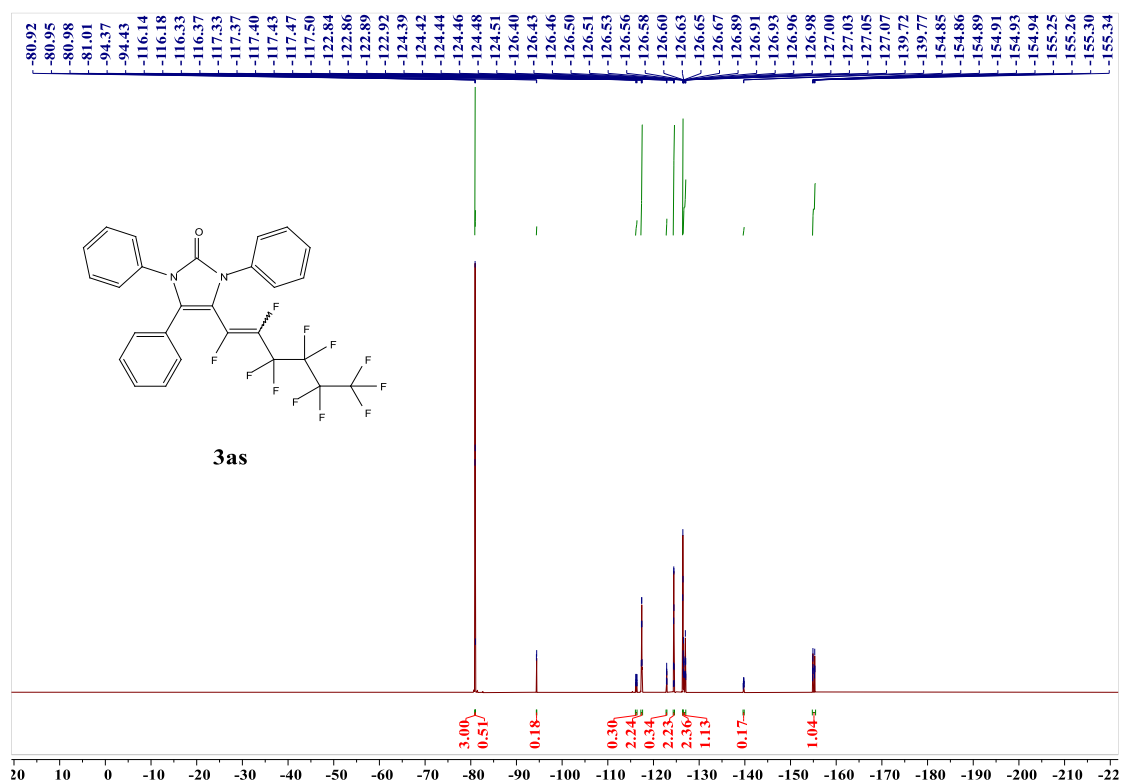

<sup>13</sup>C NMR spectra of the product **3as** (100 MHz, CDCl<sub>3</sub>)

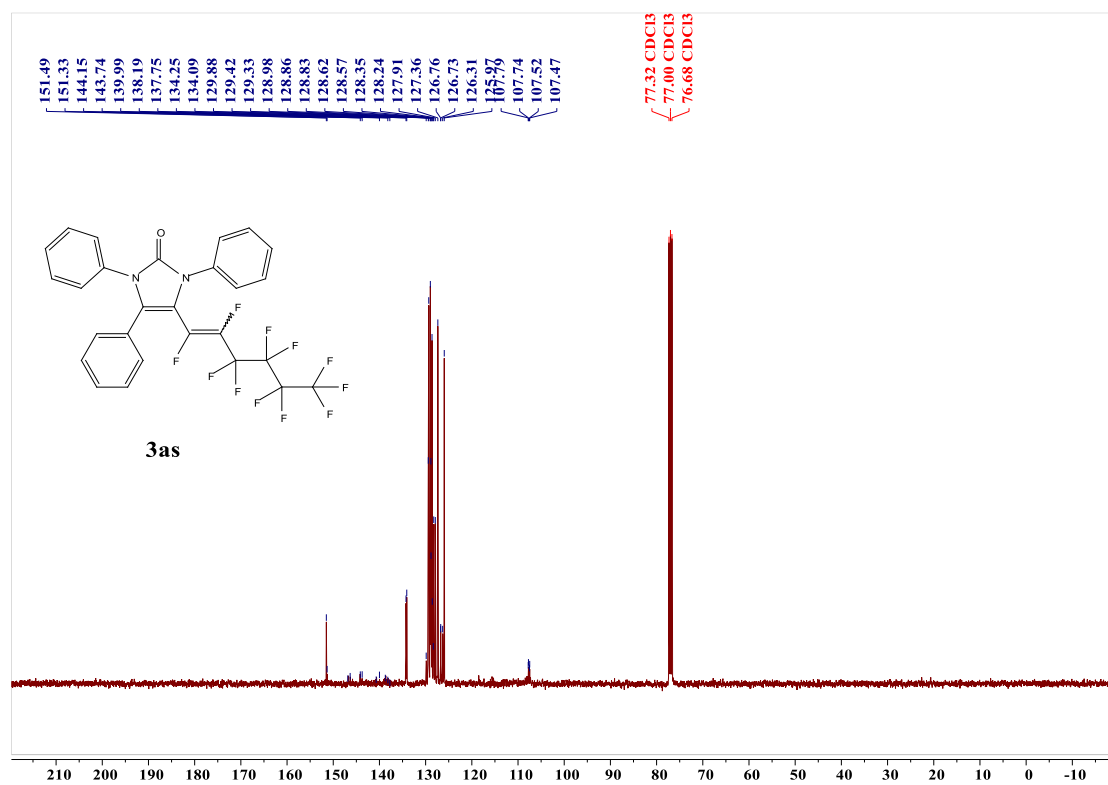

<sup>1</sup>H NMR spectra of the product **3at** (400 MHz, CDCl<sub>3</sub>)

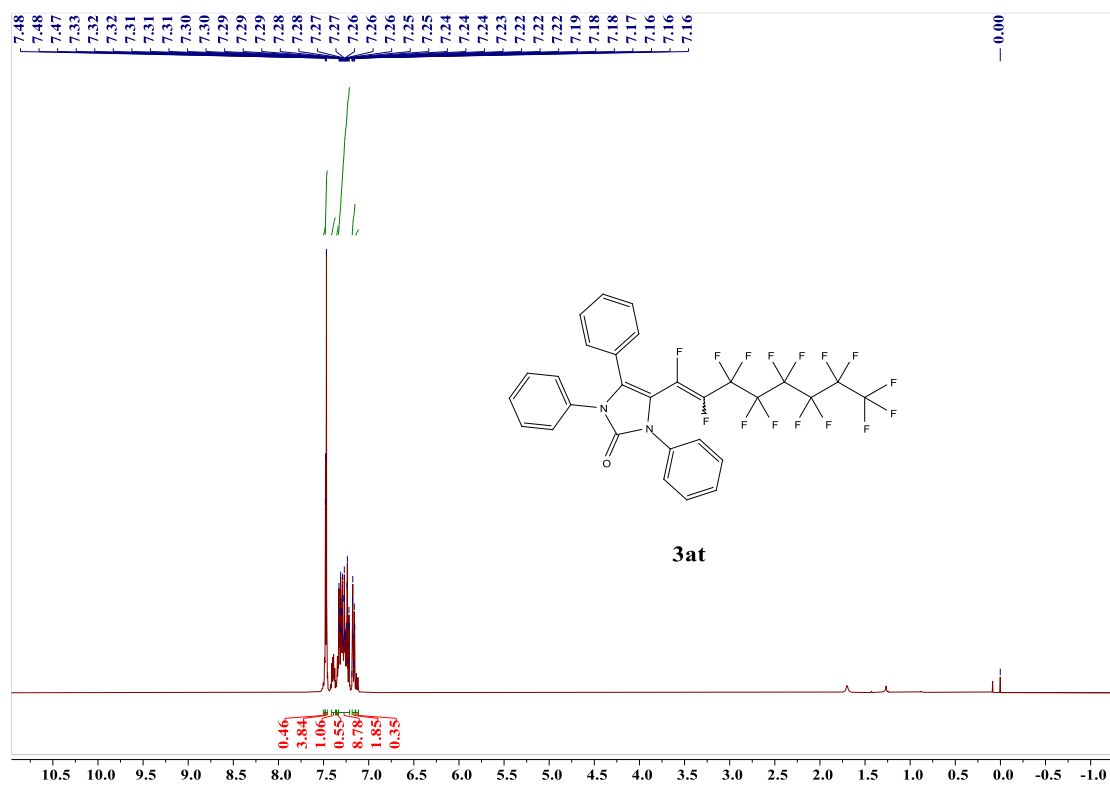

<sup>19</sup>F NMR spectra of the product **3at** (376 MHz, CDCl<sub>3</sub>)

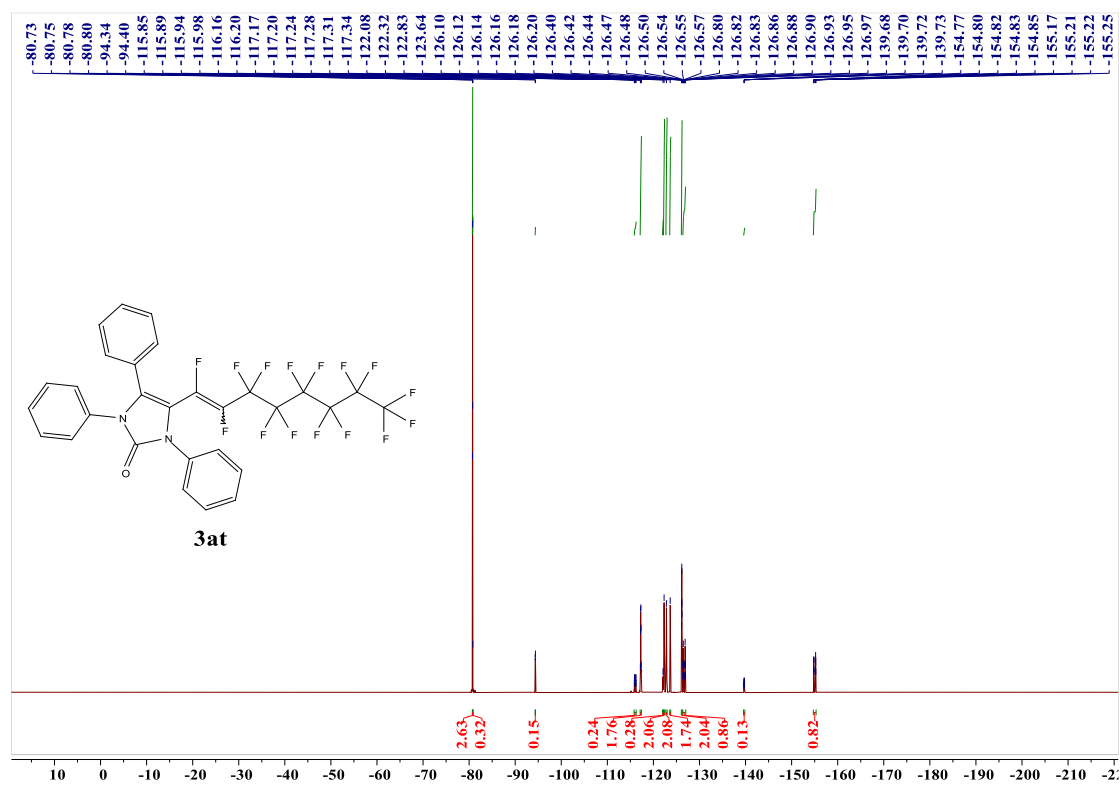



$^{13}\text{C}$  NMR spectra of the product **3at** (100 MHz,  $\text{CDCl}_3$ )

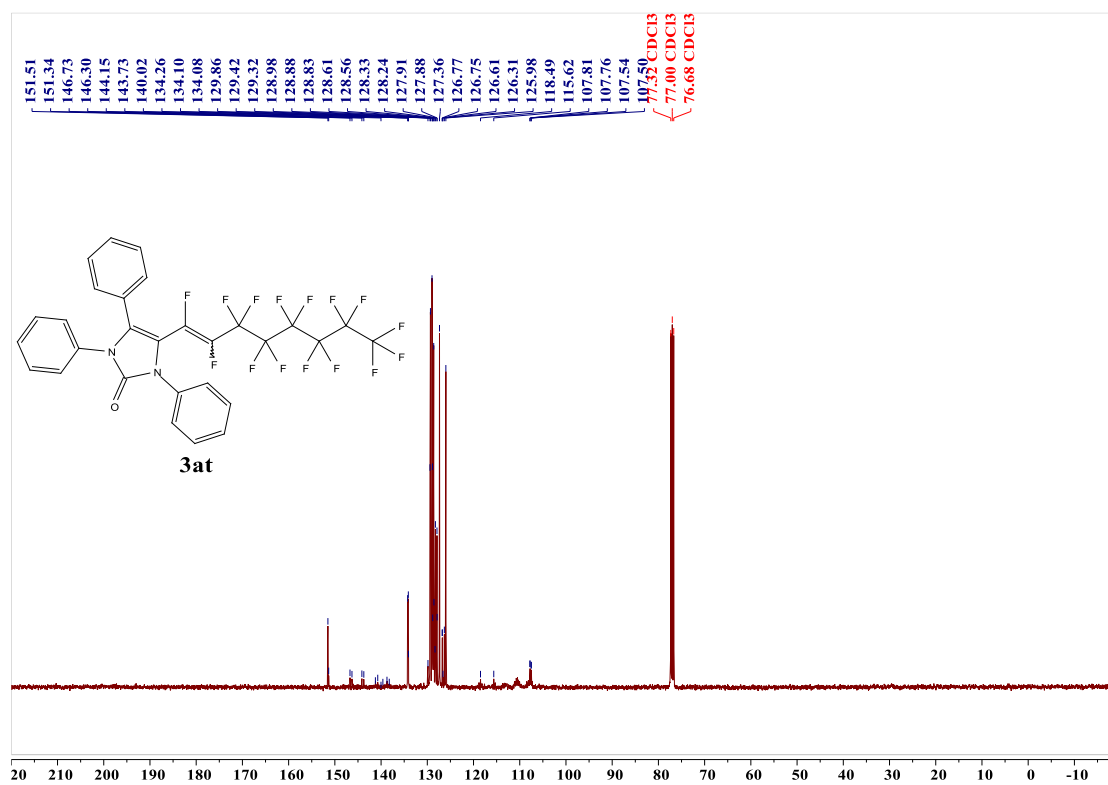

$^1\text{H}$  NMR spectra of the product **3au** (400 MHz,  $\text{CDCl}_3$ )

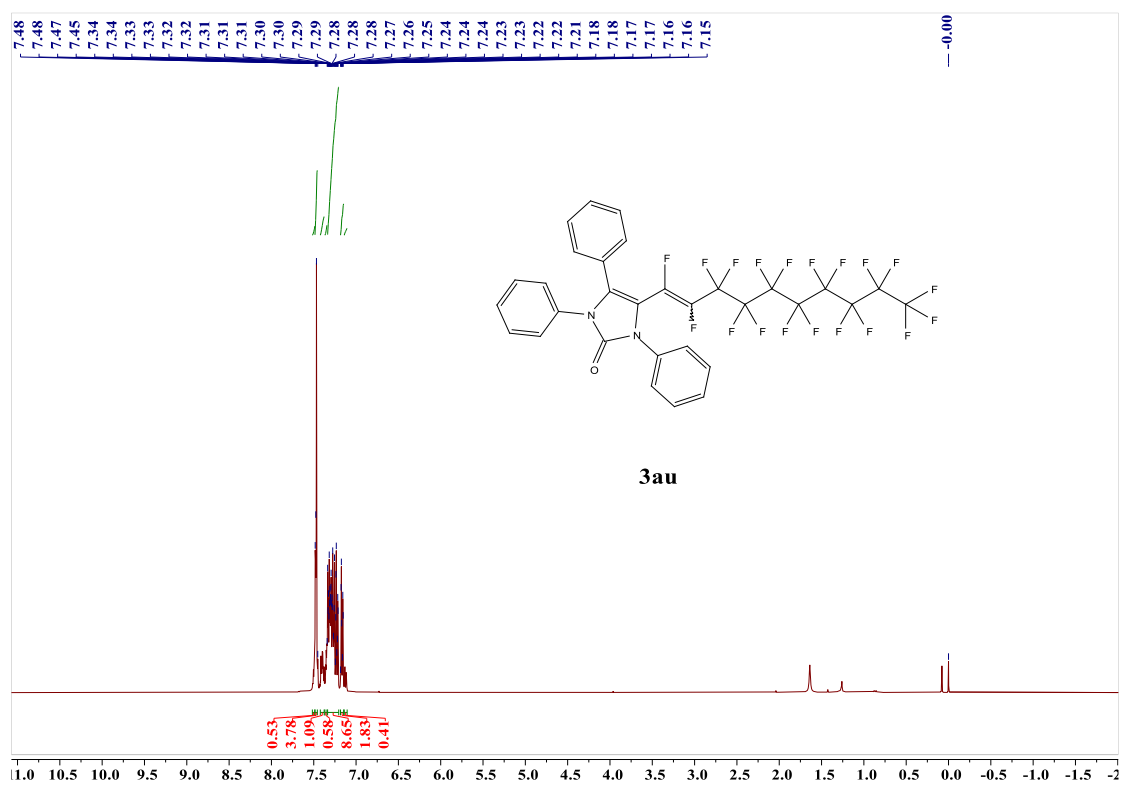

<sup>19</sup>F NMR spectra of the product **3au** (376 MHz, CDCl<sub>3</sub>)

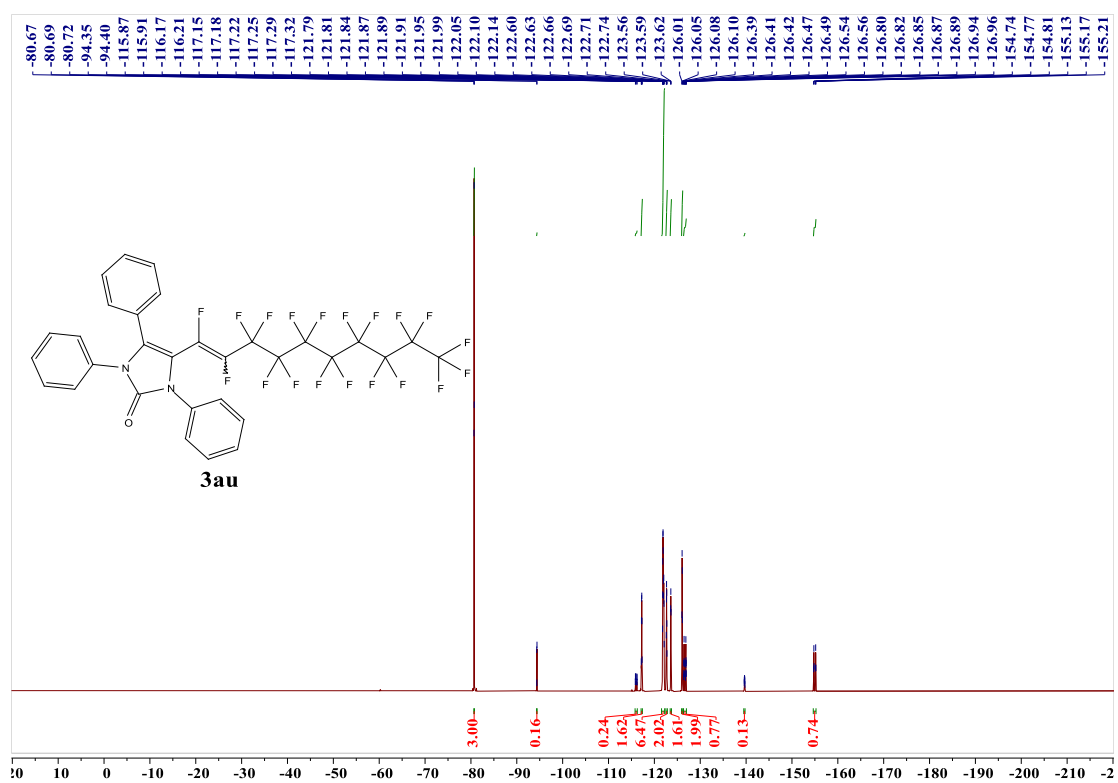

<sup>13</sup>C NMR spectra of the product **3au** (100 MHz, CDCl<sub>3</sub>)

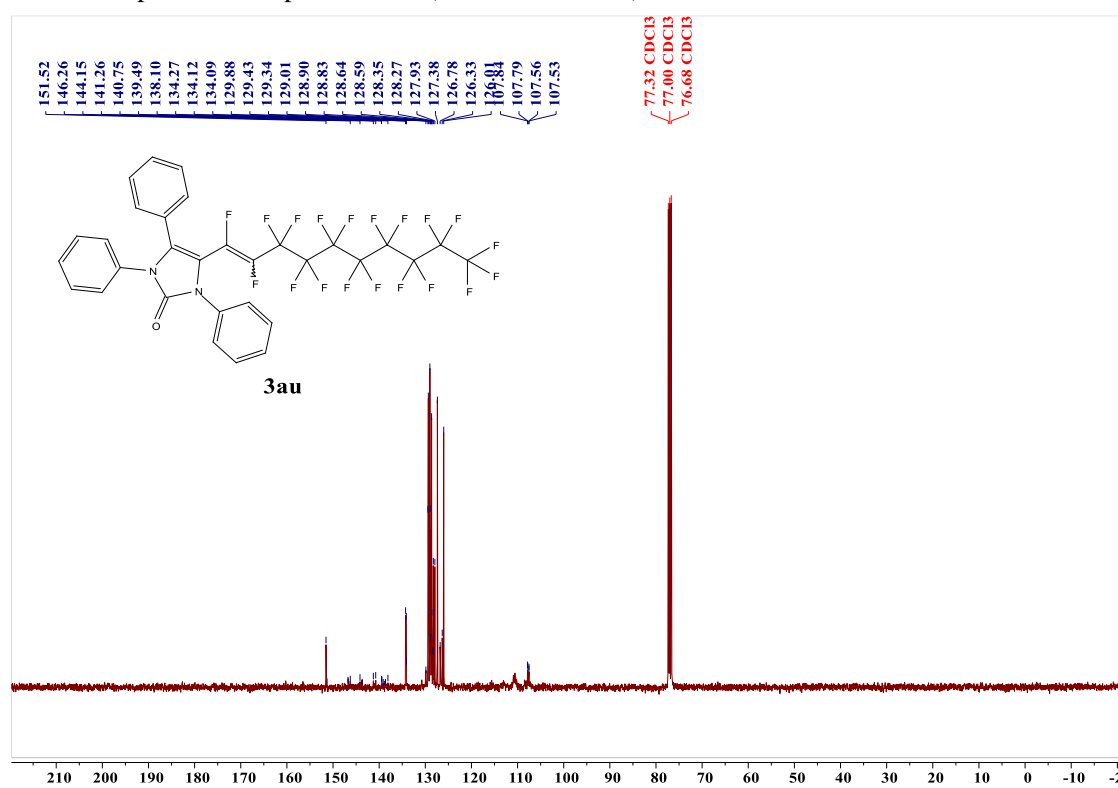

<sup>1</sup>H NMR spectra of the product **3ba** (400 MHz, CDCl<sub>3</sub>)

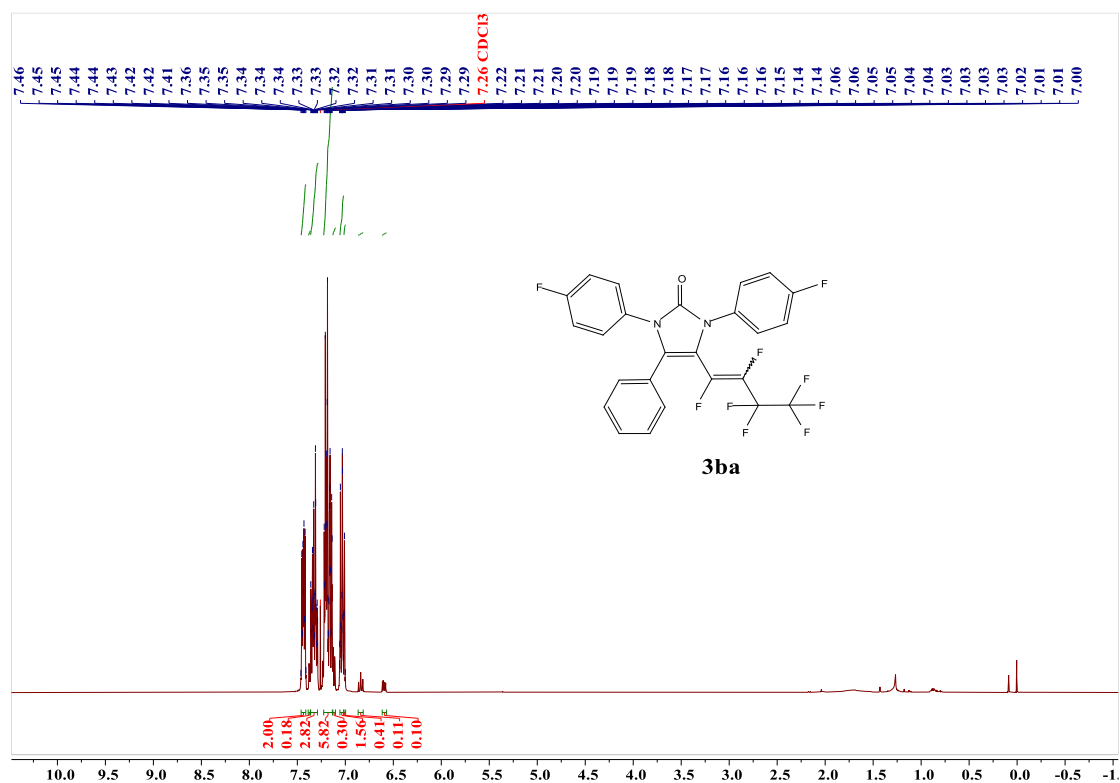

<sup>19</sup>F NMR spectra of the product **3ba** (376 MHz, CDCl<sub>3</sub>)

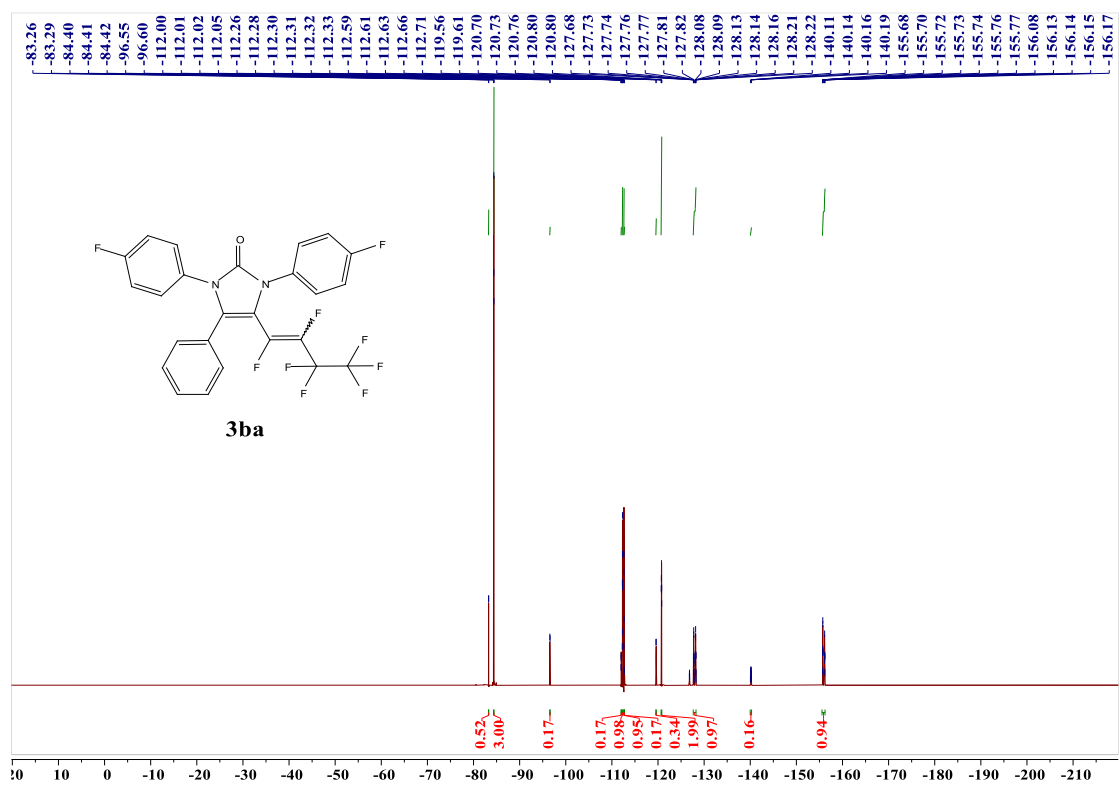

$^{13}\text{C}$  NMR spectra of the product **3ba** (100 MHz,  $\text{CDCl}_3$ )

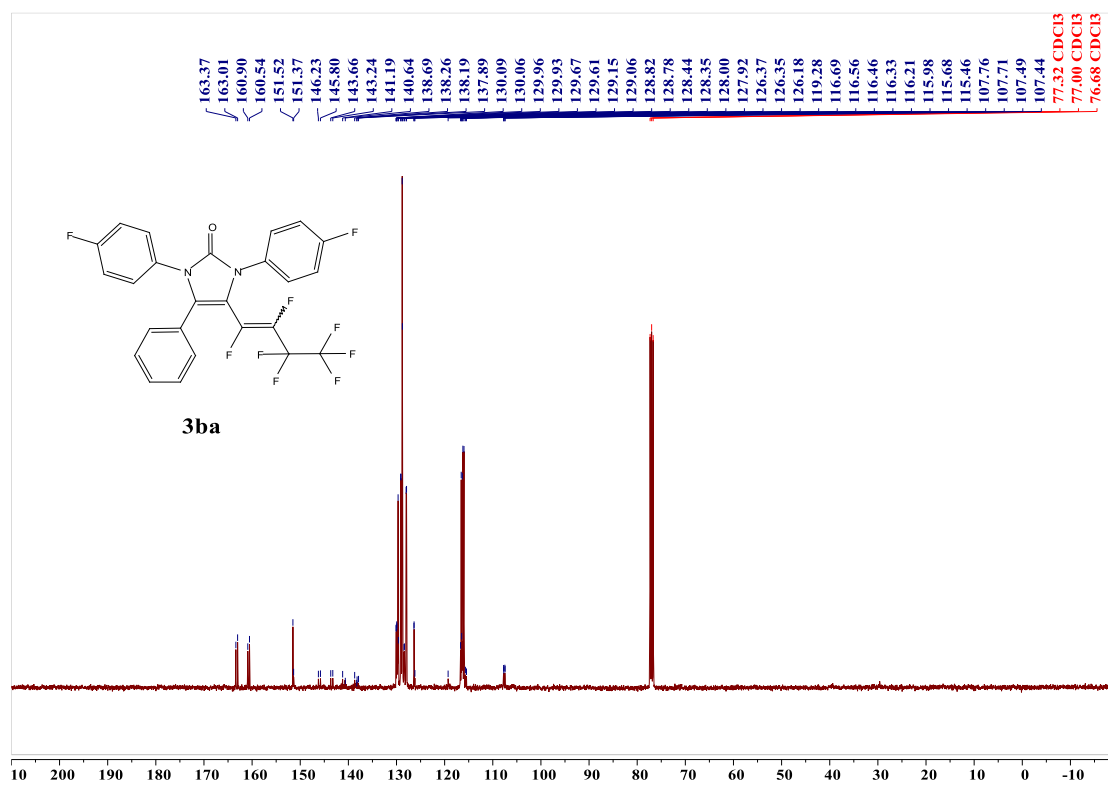

$^1\text{H}$  NMR spectra of the product **3ca** (400 MHz,  $\text{CDCl}_3$ )

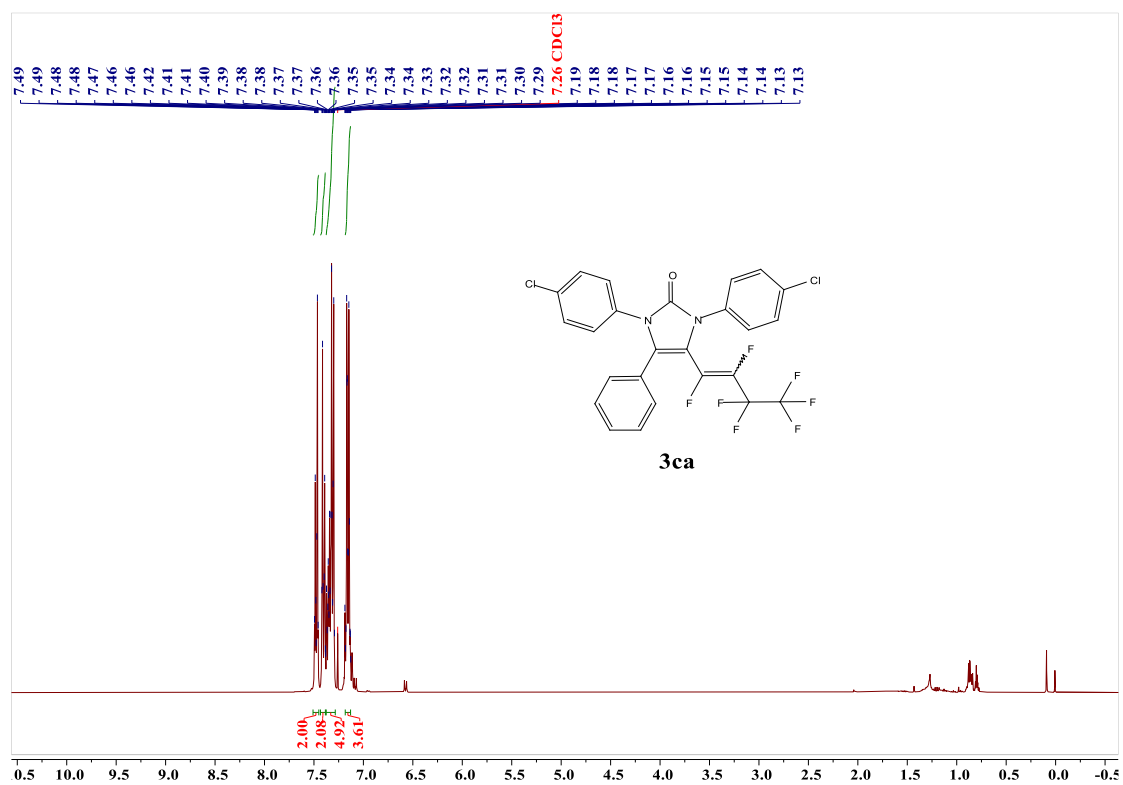

<sup>19</sup>F NMR spectra of the product **3ca** (376 MHz, CDCl<sub>3</sub>)

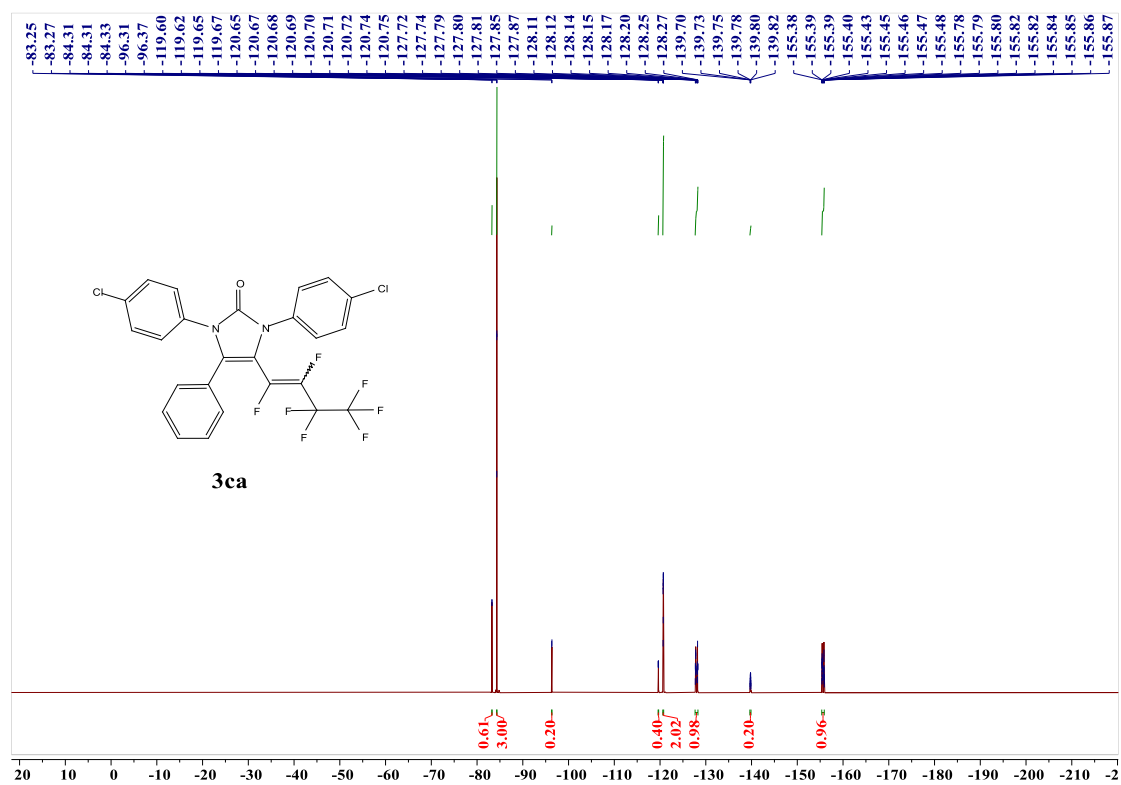

<sup>13</sup>C NMR spectra of the product **3ca** (100 MHz, CDCl<sub>3</sub>)

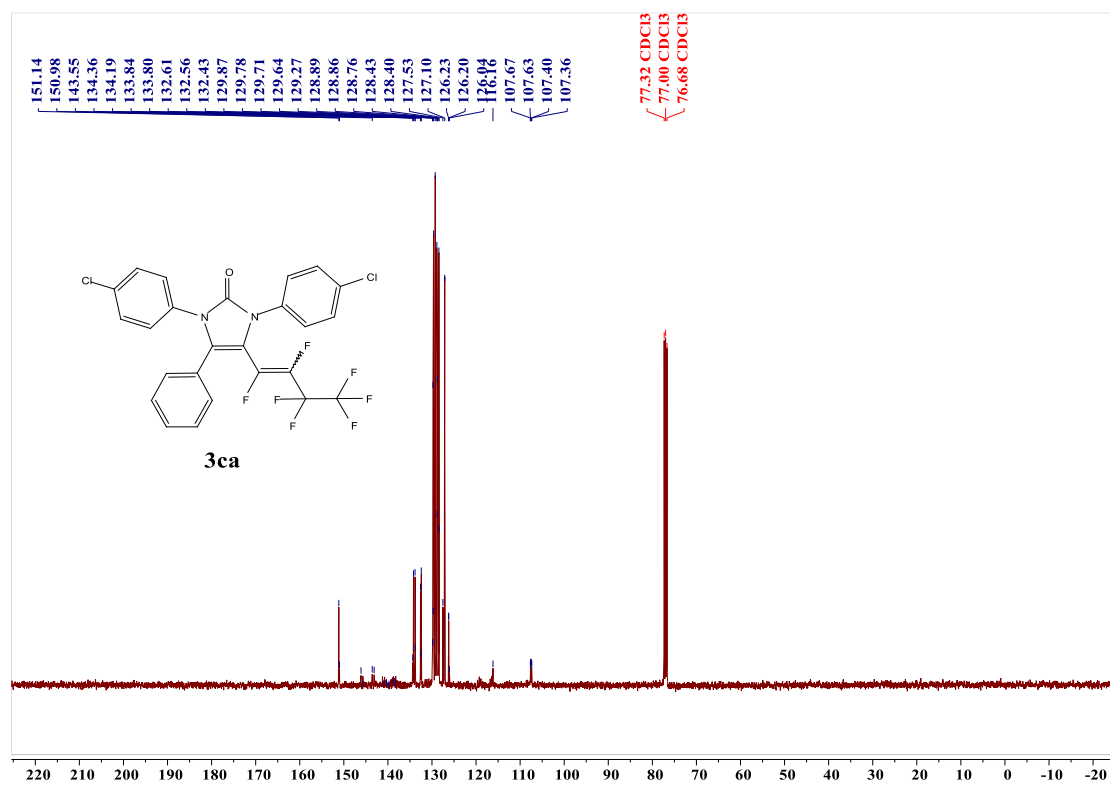

<sup>1</sup>H NMR spectra of the product **3da** (400 MHz, CDCl<sub>3</sub>)

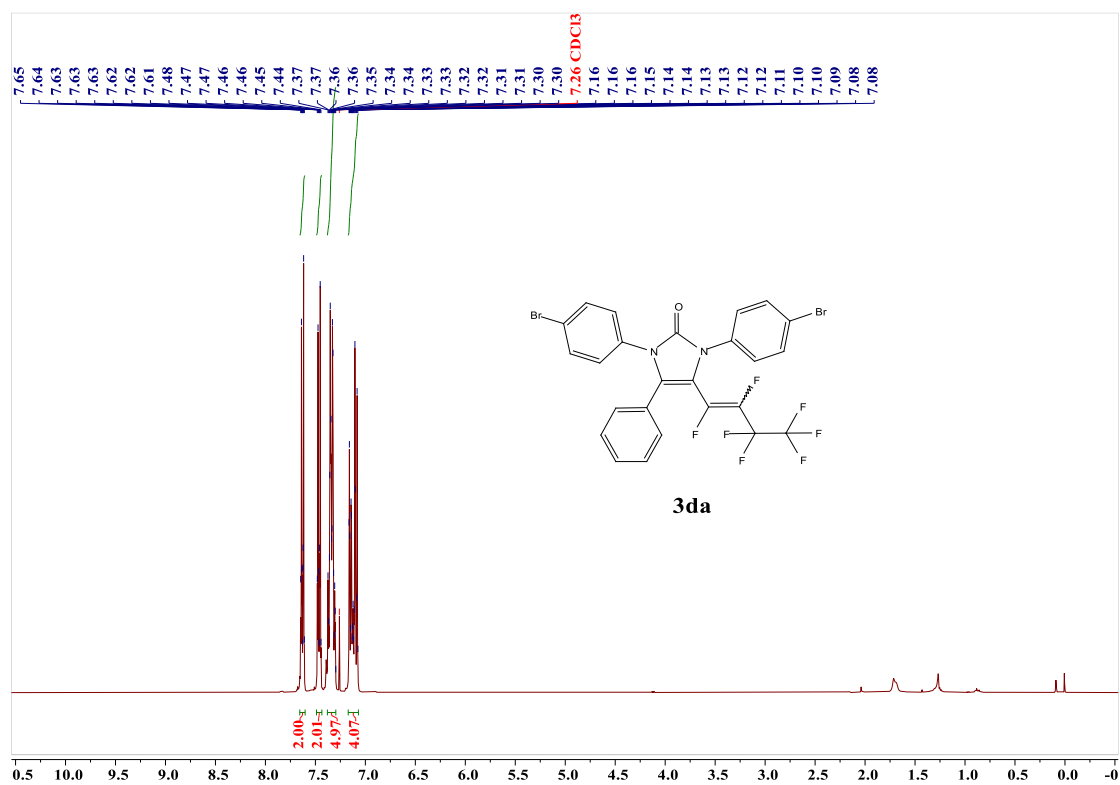

<sup>19</sup>F NMR spectra of the product **3da** (376 MHz, CDCl<sub>3</sub>)

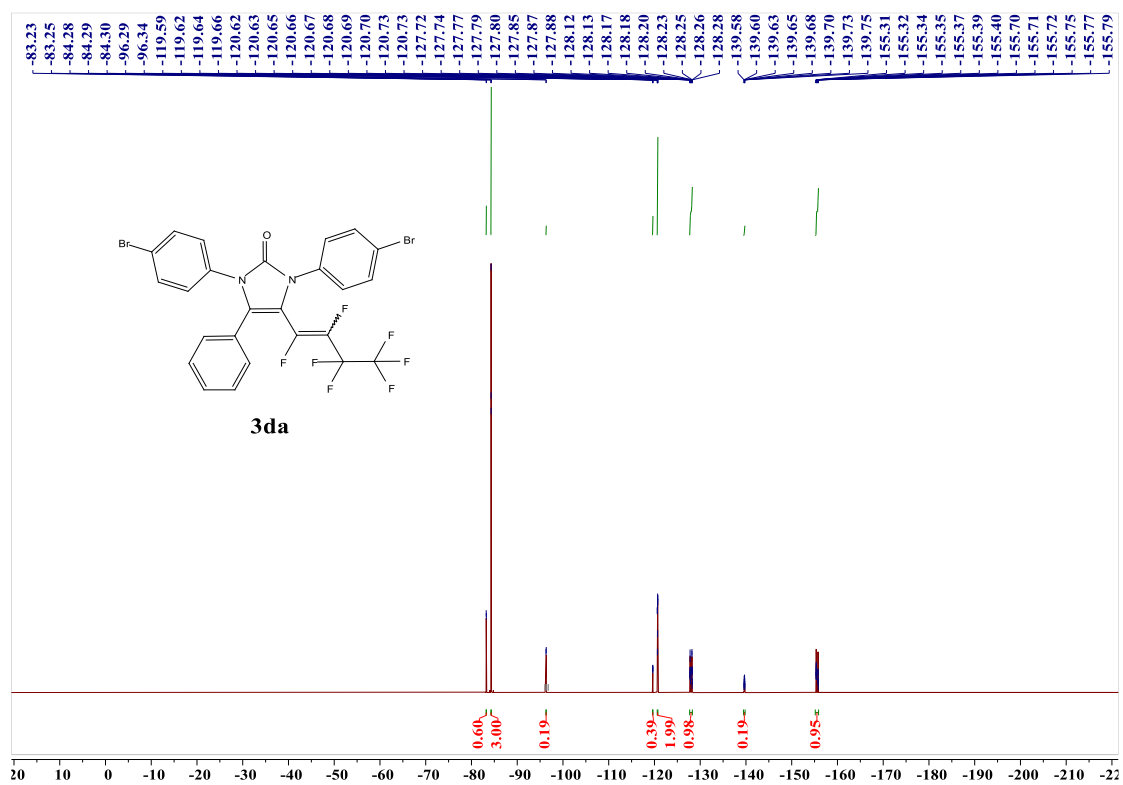

$^{13}\text{C}$  NMR spectra of the product **3da** (100 MHz,  $\text{CDCl}_3$ )

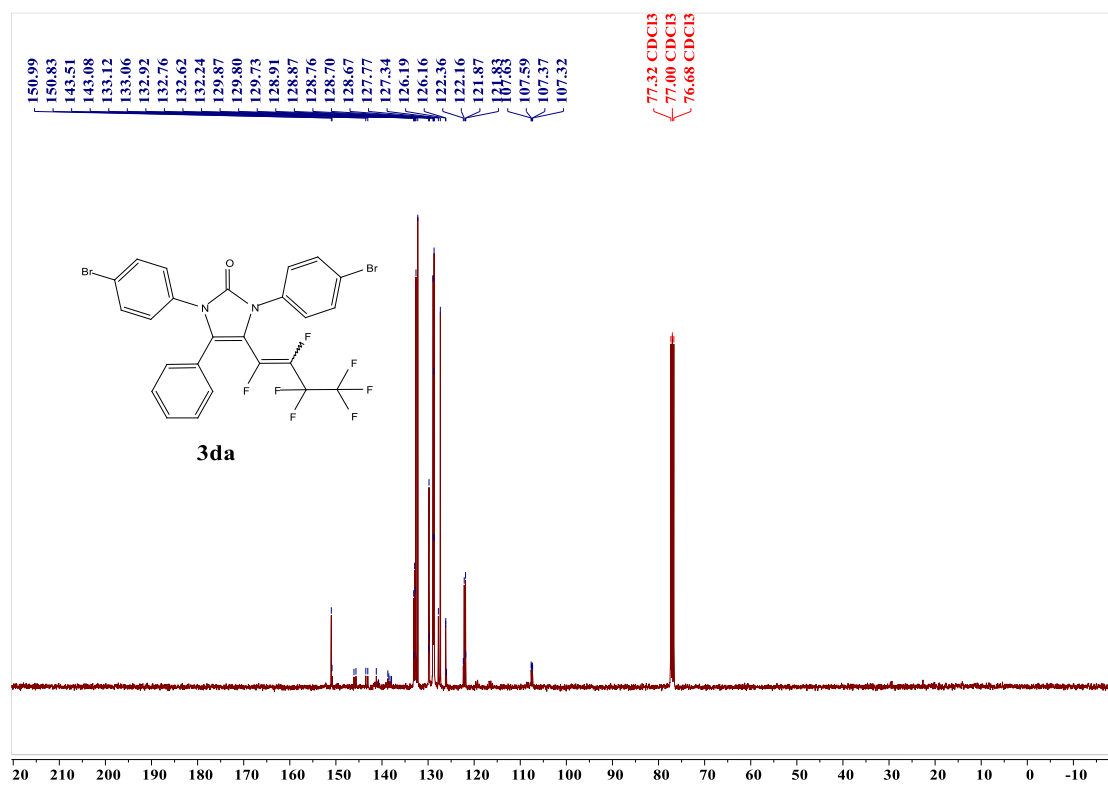

$^1\text{H}$  NMR spectra of the product **3ea** (400 MHz,  $\text{CDCl}_3$ )

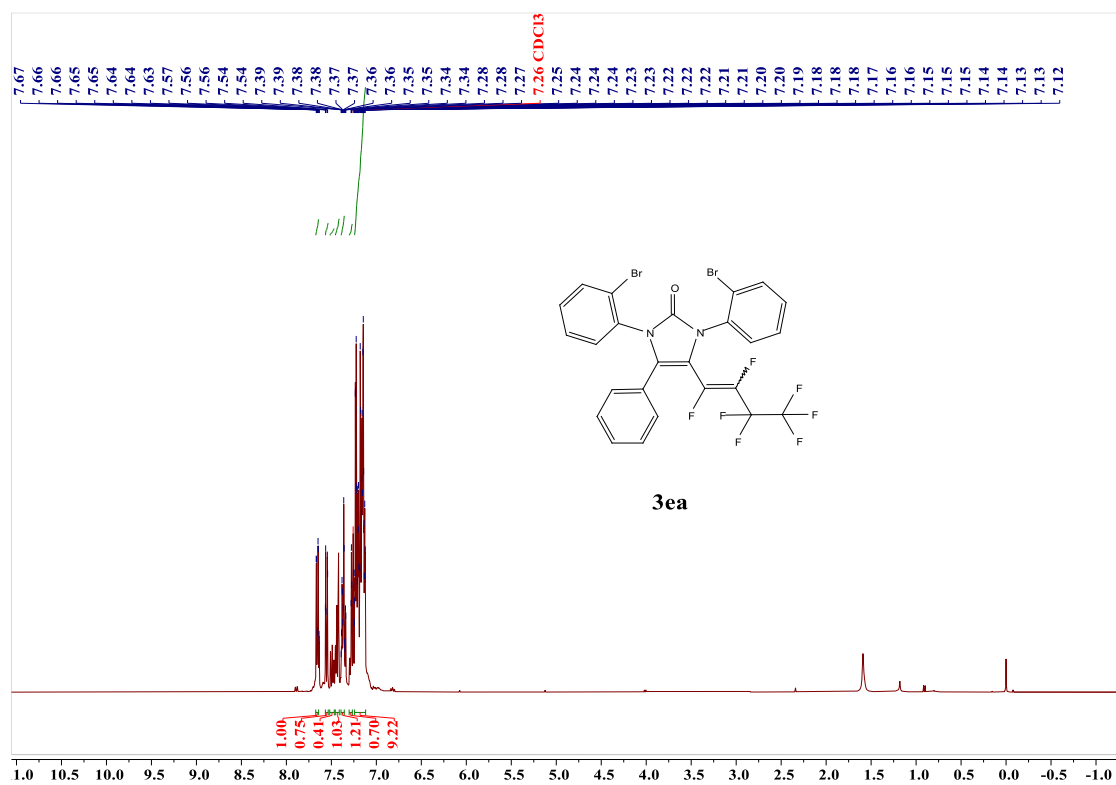

$^{19}\text{F}$  NMR spectra of the product **3ea** (376 MHz,  $\text{CDCl}_3$ )

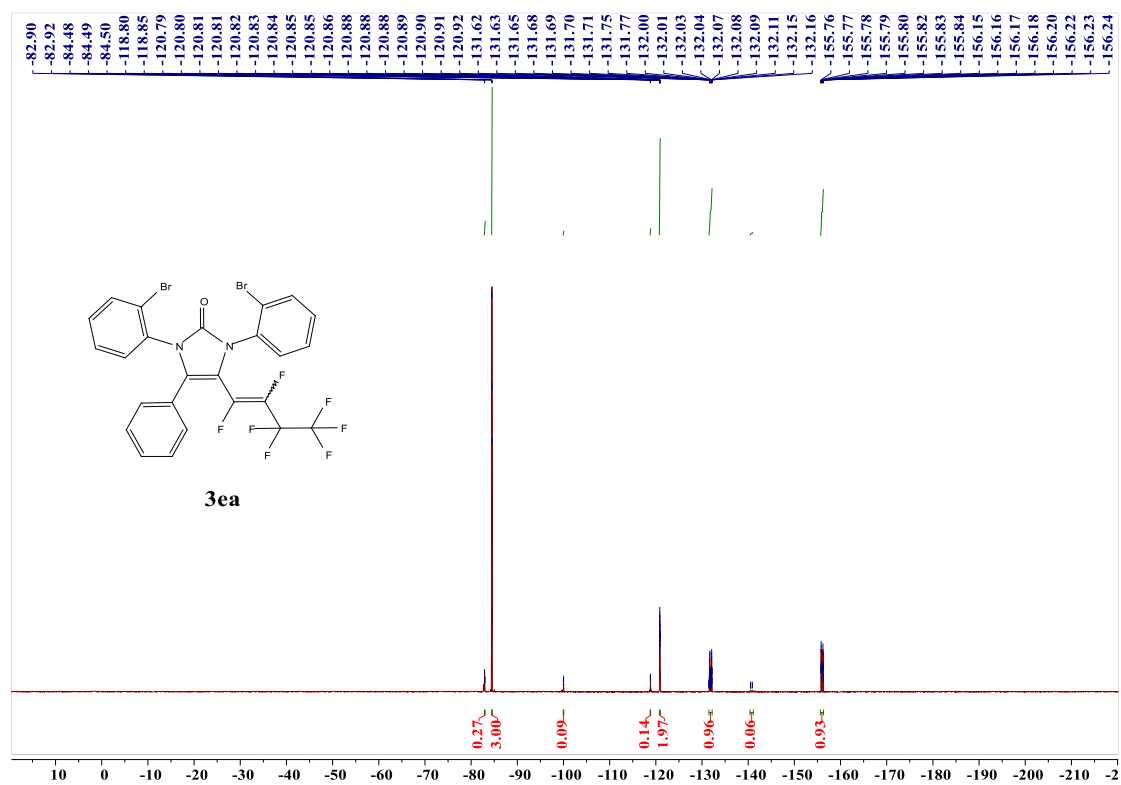

$^{13}\text{C}$  NMR spectra of the product **3ea** (100 MHz,  $\text{CDCl}_3$ )

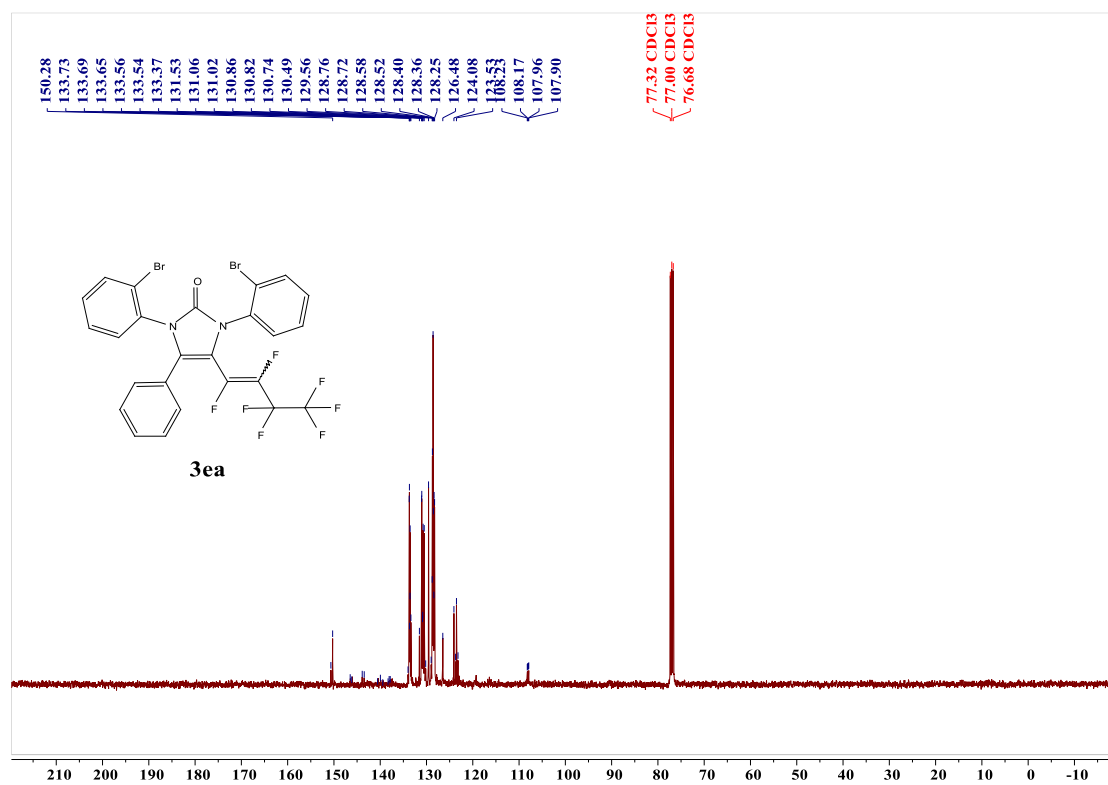



$^1\text{H}$  NMR spectra of the product **3fa** (400 MHz,  $\text{CDCl}_3$ )

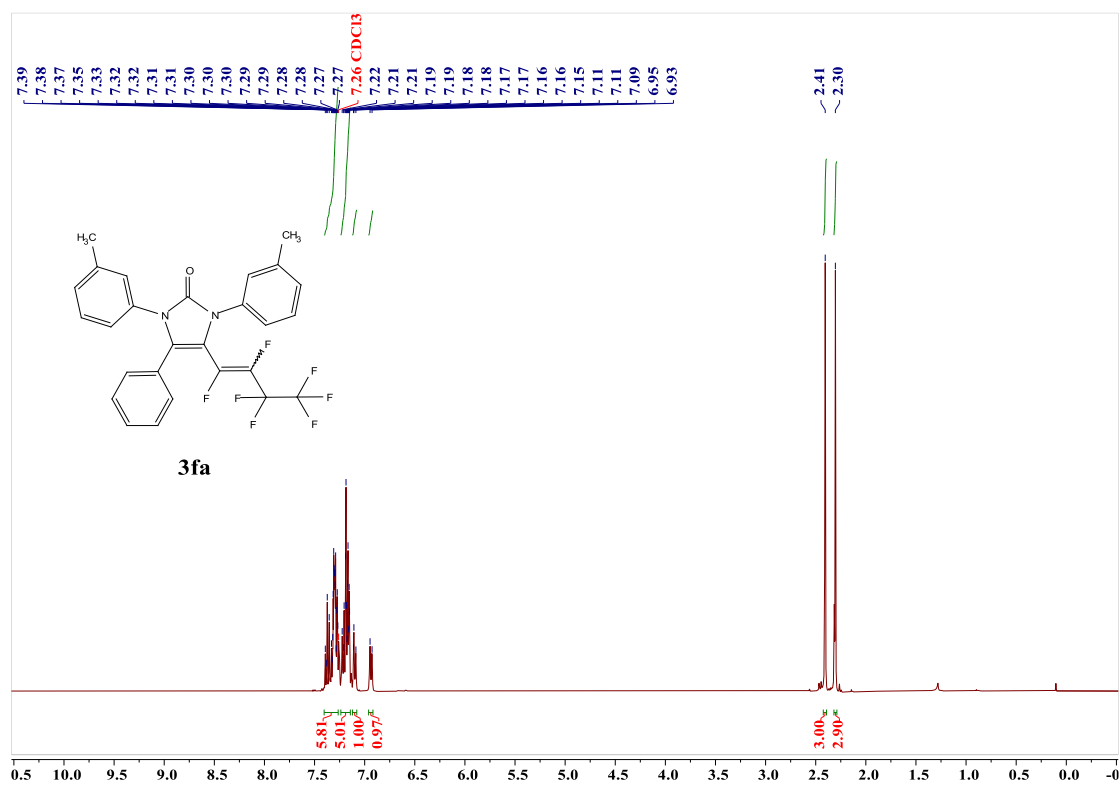

$^{19}\text{F}$  NMR spectra of the product **3fa** (376 MHz,  $\text{CDCl}_3$ )

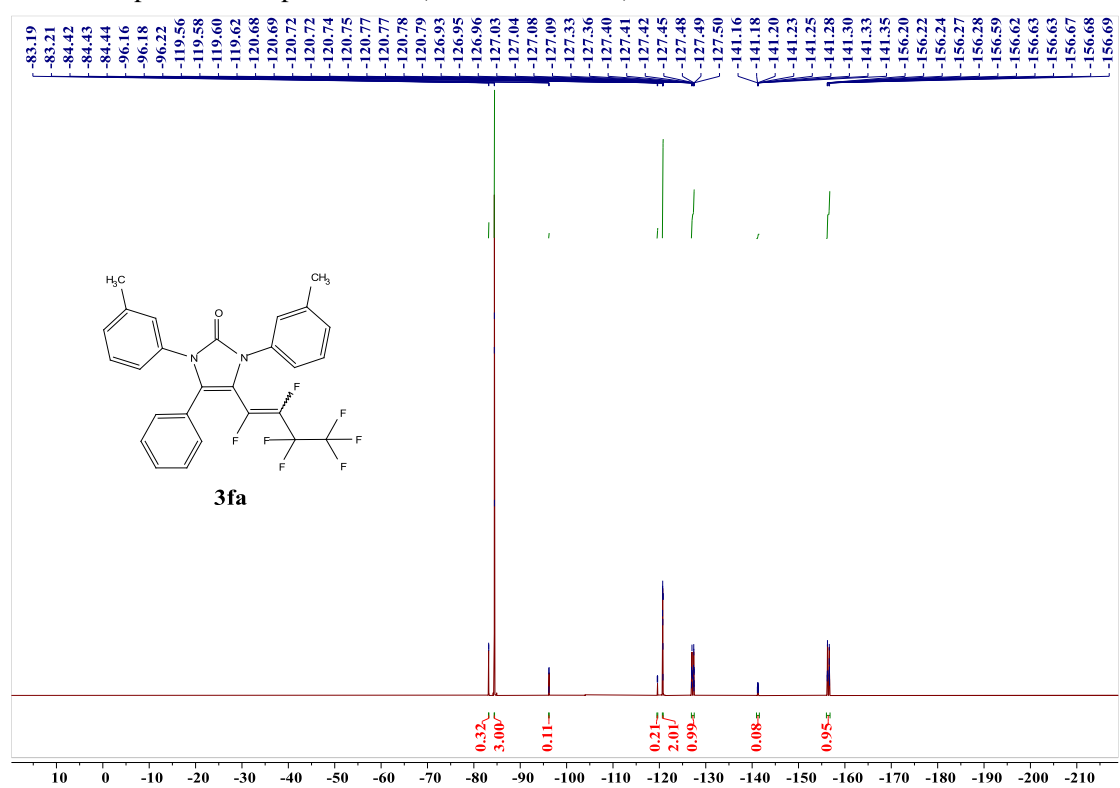

$^{13}\text{C}$  NMR spectra of the product **3fa** (100 MHz,  $\text{CDCl}_3$ )

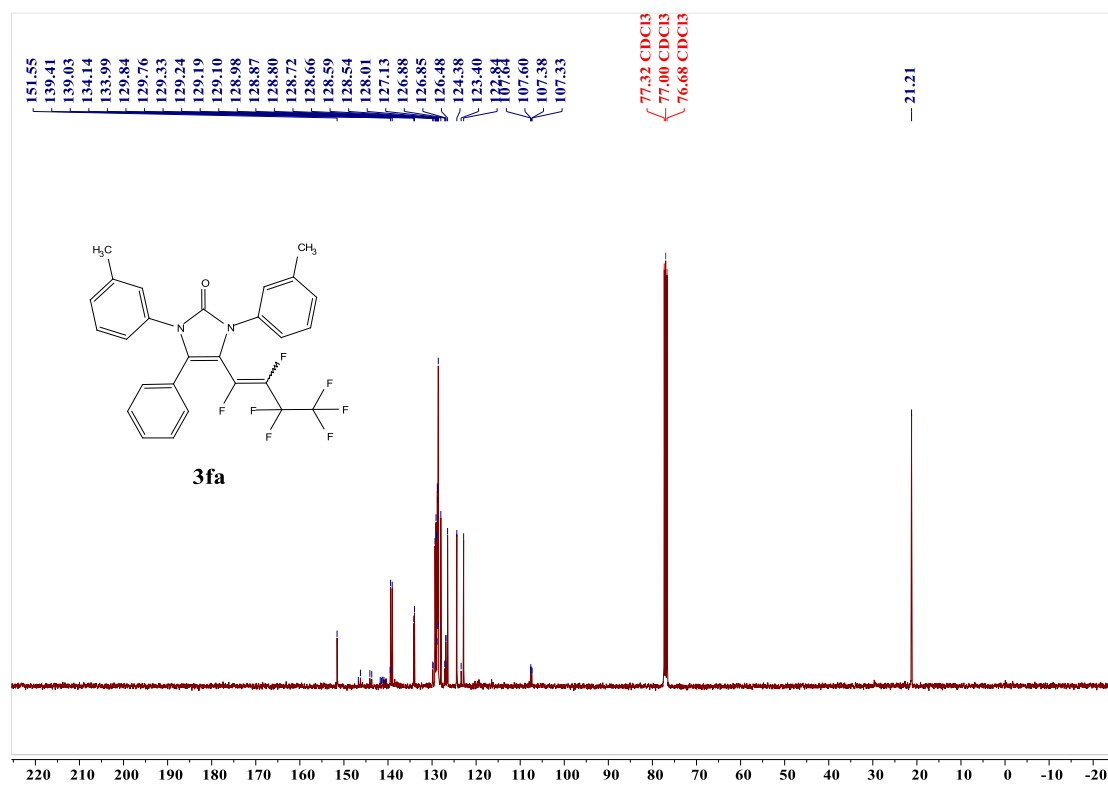

$^1\text{H}$  NMR spectra of the product **3ga** (400 MHz,  $\text{CDCl}_3$ )

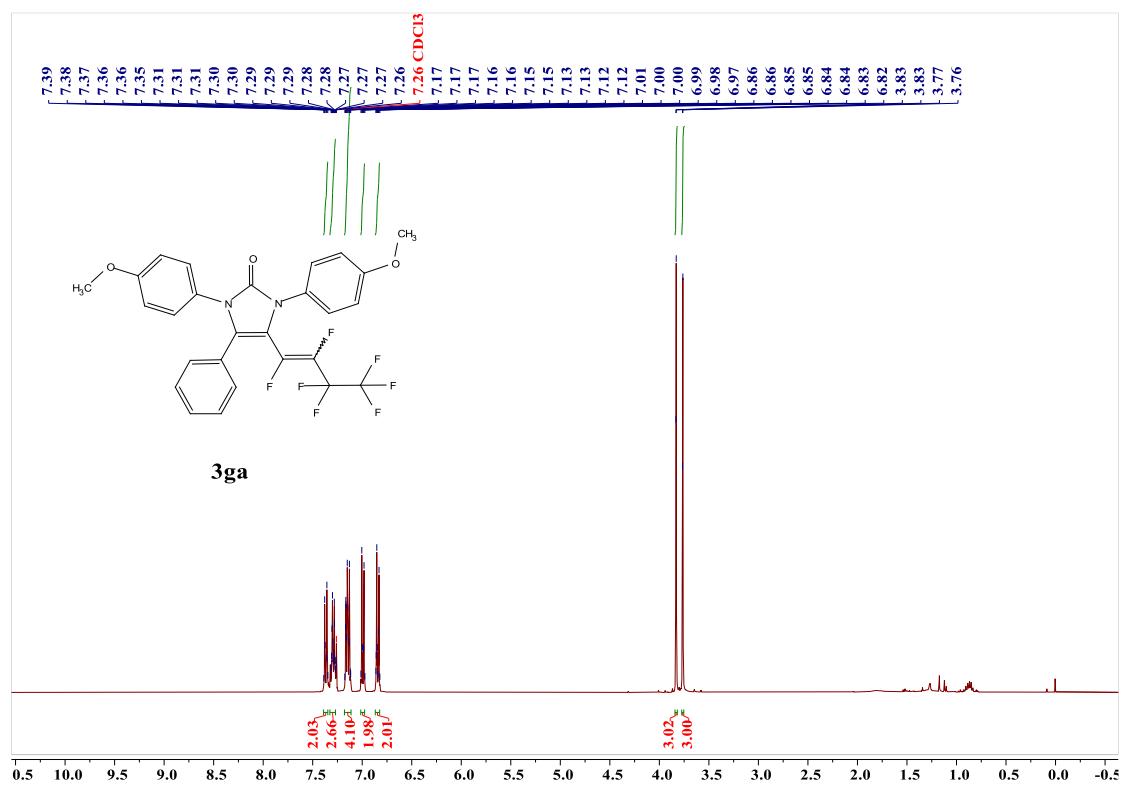

$^{19}\text{F}$  NMR spectra of the product **3ga** (376 MHz,  $\text{CDCl}_3$ )

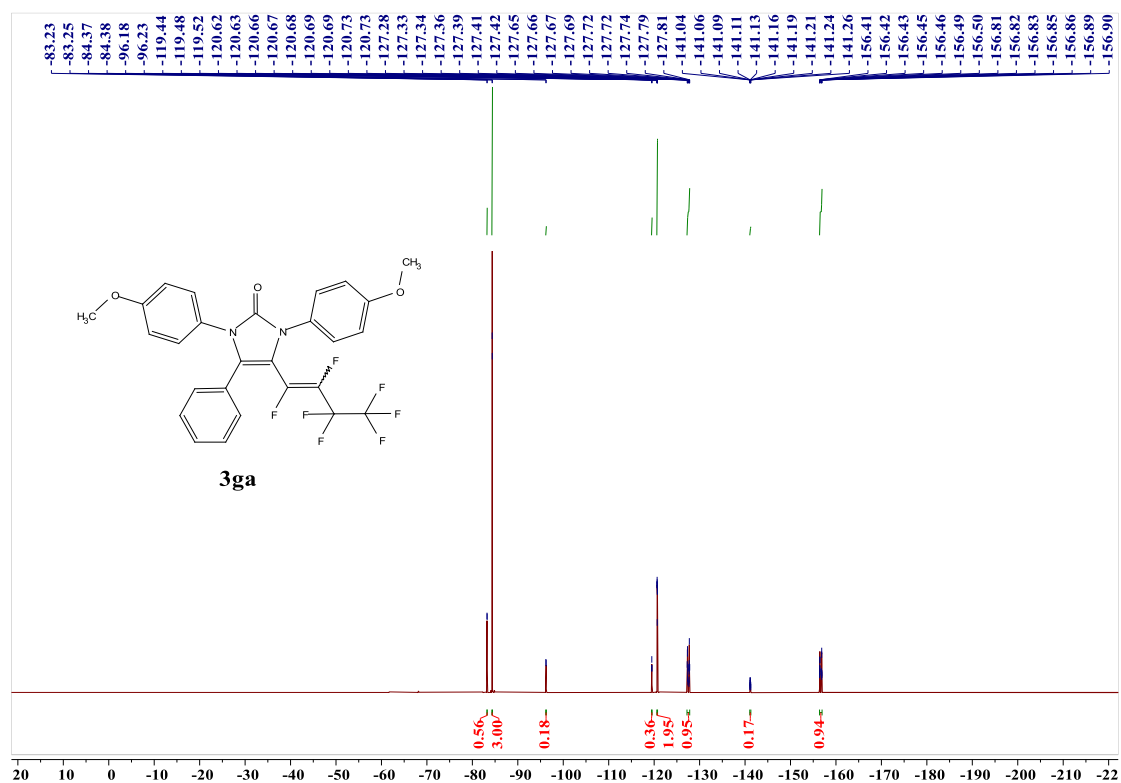

$^{13}\text{C}$  NMR spectra of the product **3ga** (100 MHz,  $\text{CDCl}_3$ )

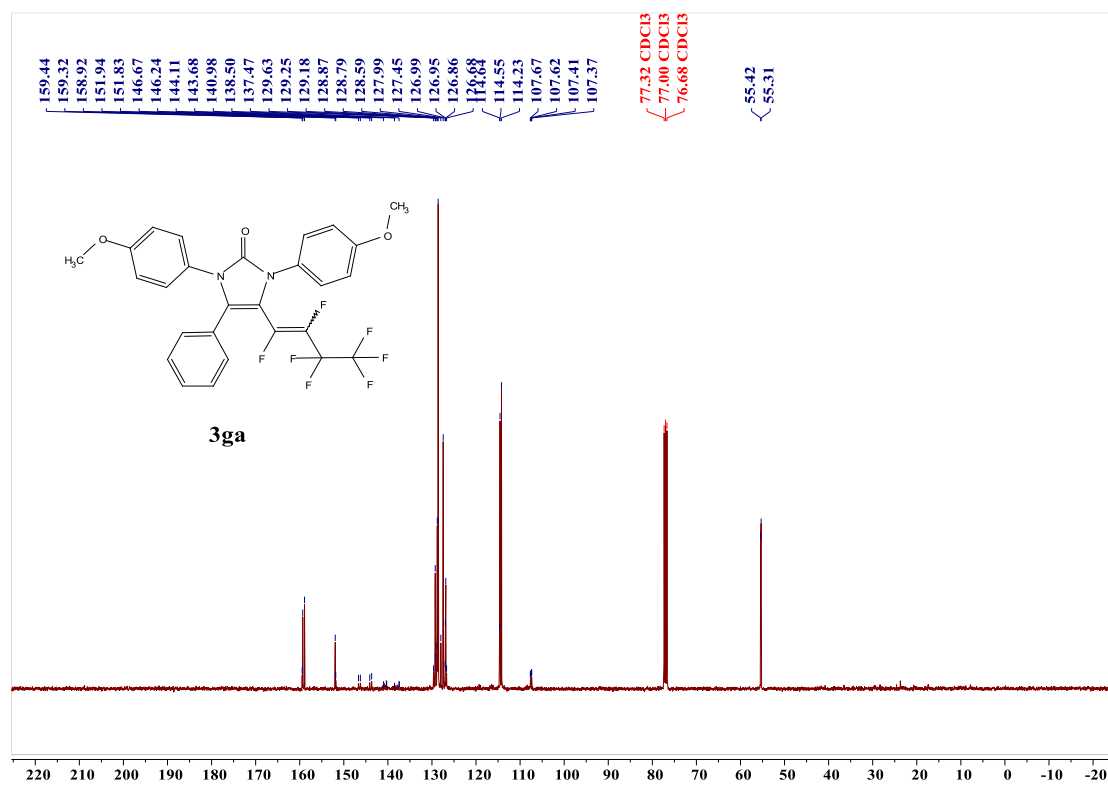

<sup>1</sup>H NMR spectra of the product **3ha** (400 MHz, CDCl<sub>3</sub>)

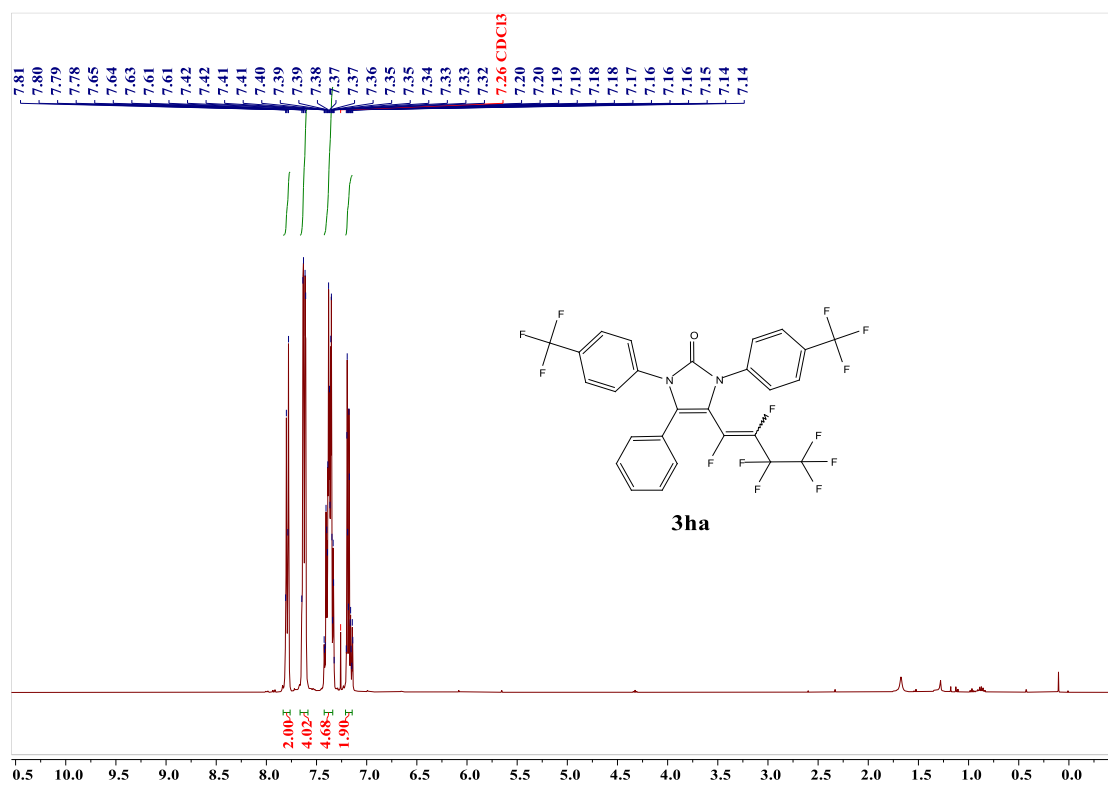

<sup>19</sup>F NMR spectra of the product **3ha** (376 MHz, CDCl<sub>3</sub>)

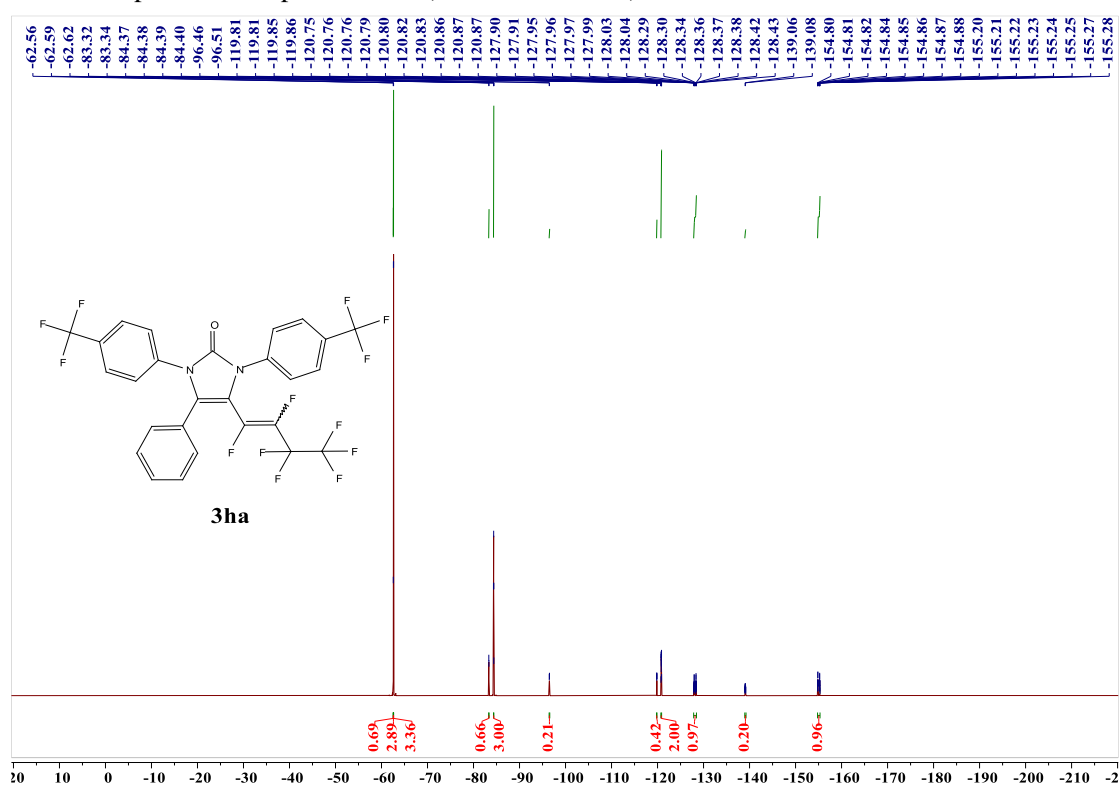

$^{13}\text{C}$  NMR spectra of the product **3ha** (100 MHz,  $\text{CDCl}_3$ )

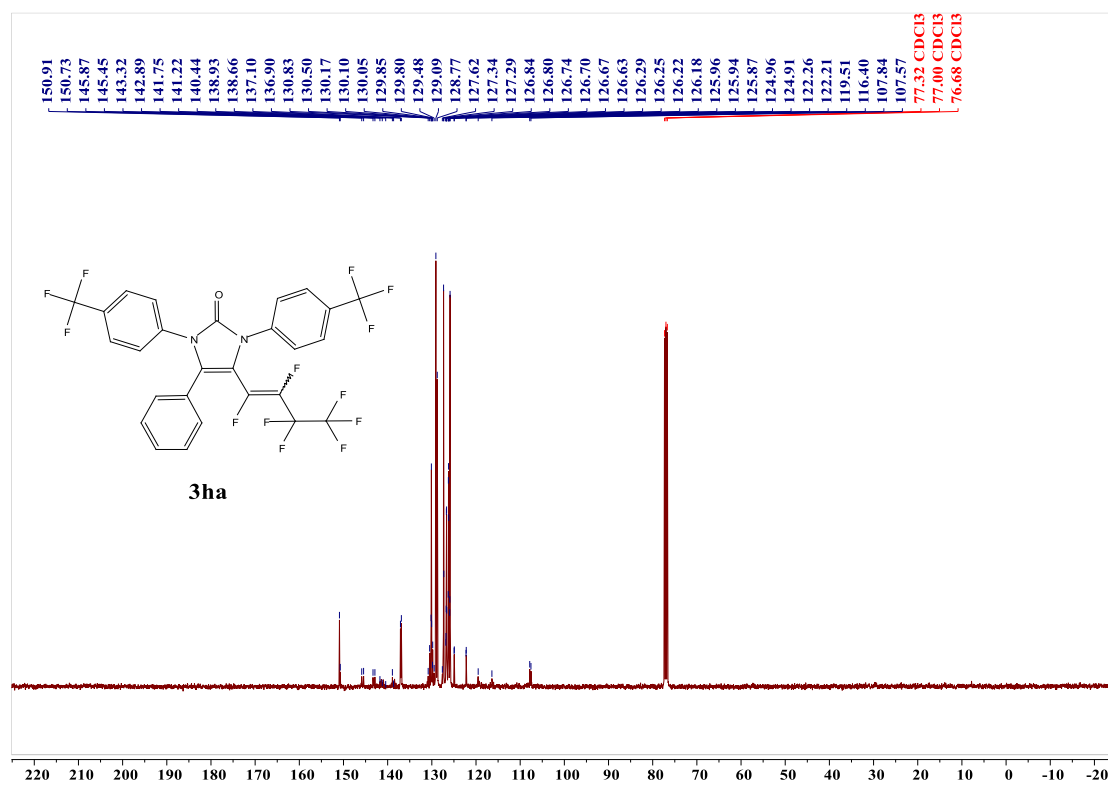

$^1\text{H}$  NMR spectra of the product **3ia** (400 MHz,  $\text{CDCl}_3$ )

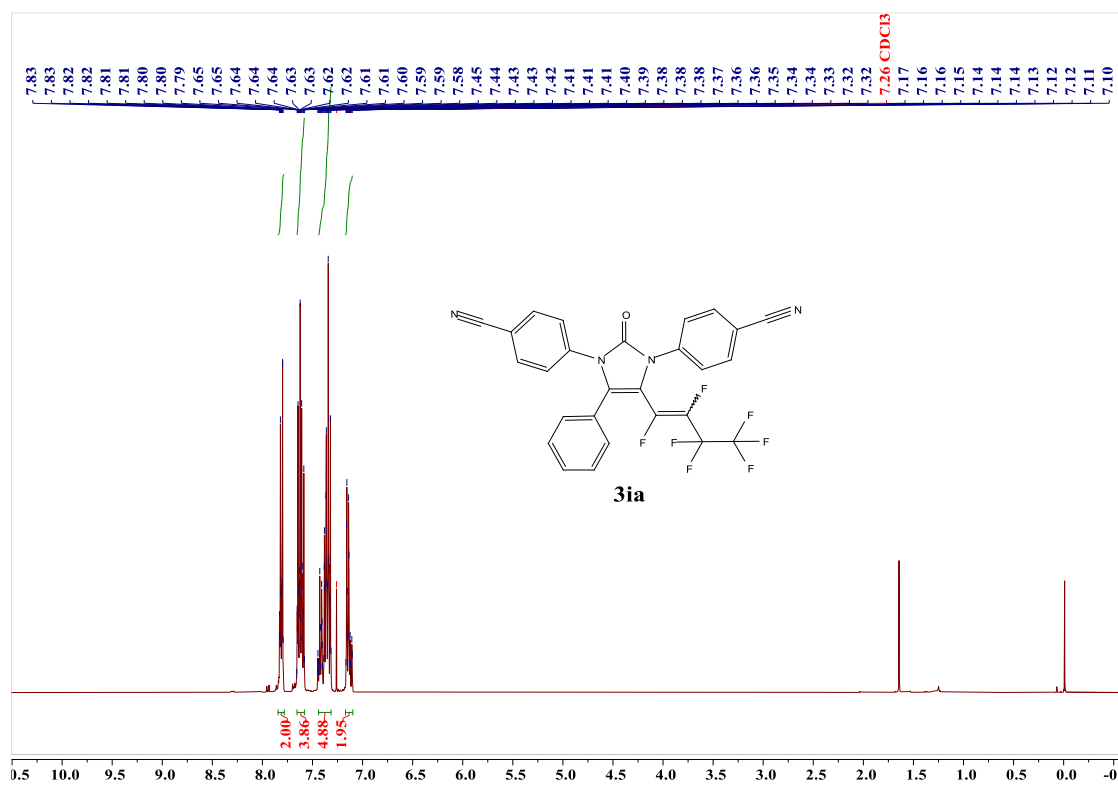

$^{19}\text{F}$  NMR spectra of the product **3ia** (376 MHz,  $\text{CDCl}_3$ )

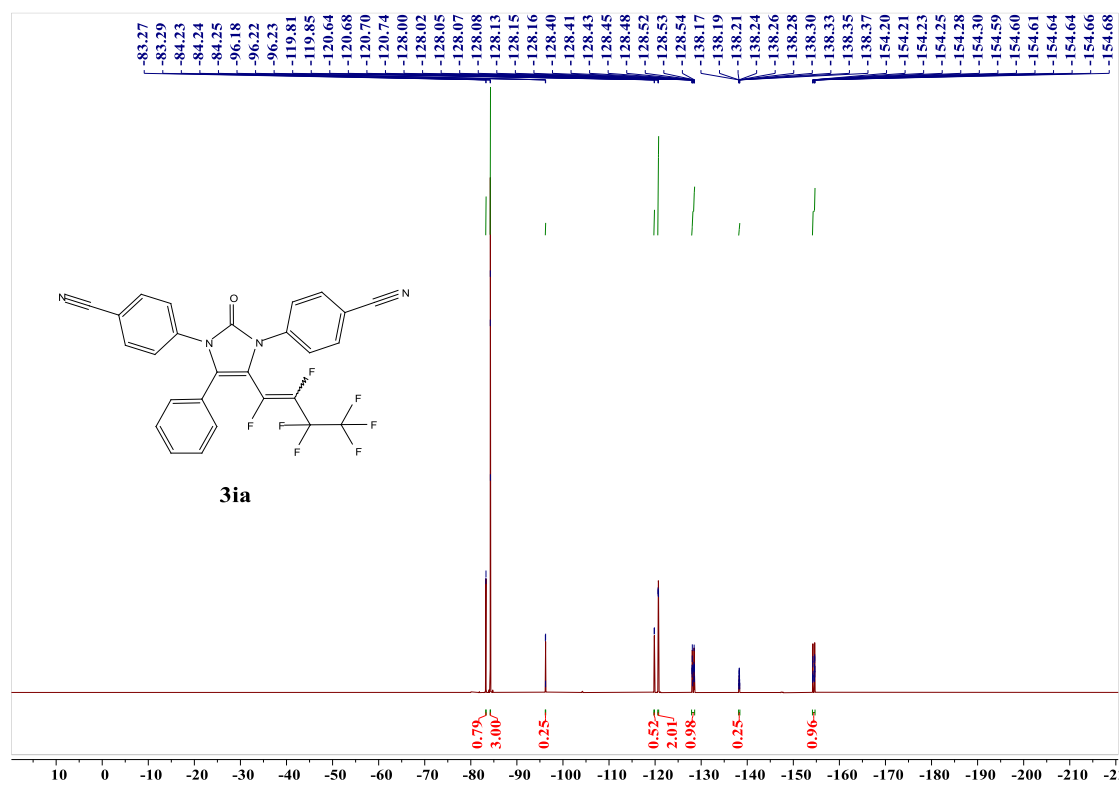

$^{13}\text{C}$  NMR spectra of the product **3ia** (100 MHz,  $\text{CDCl}_3$ )

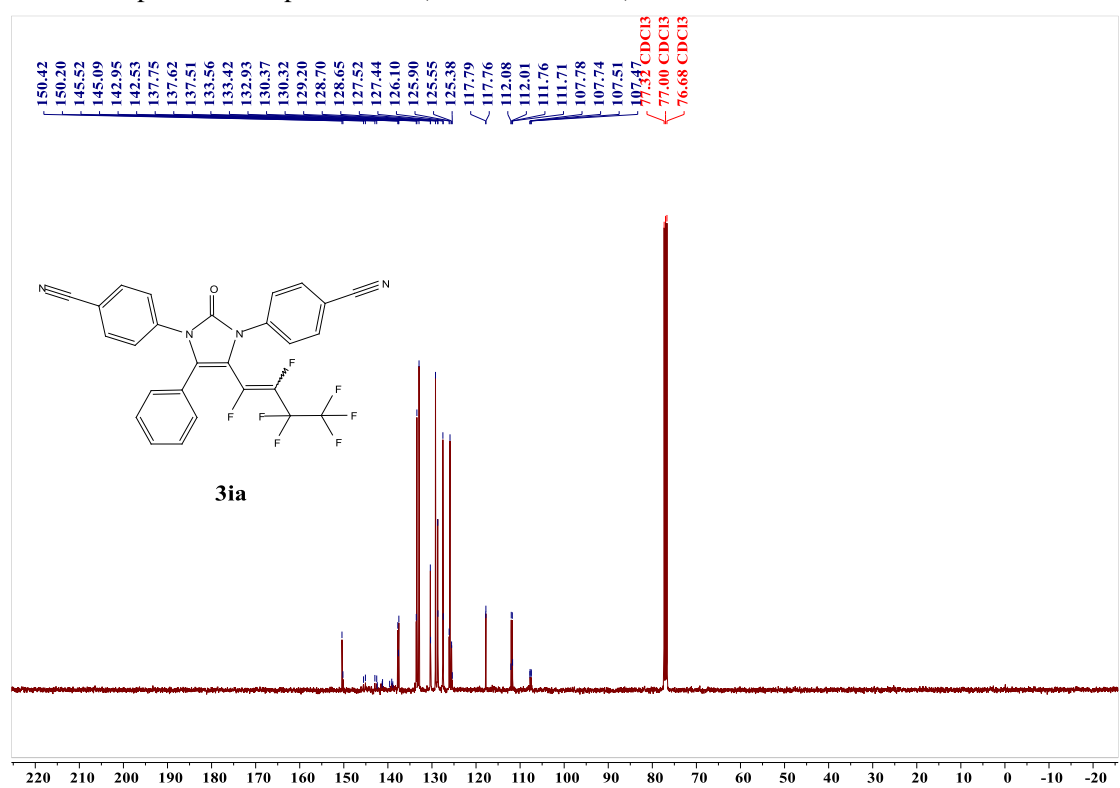

$^1\text{H}$  NMR spectra of the product **3ja** (400 MHz,  $\text{CDCl}_3$ )

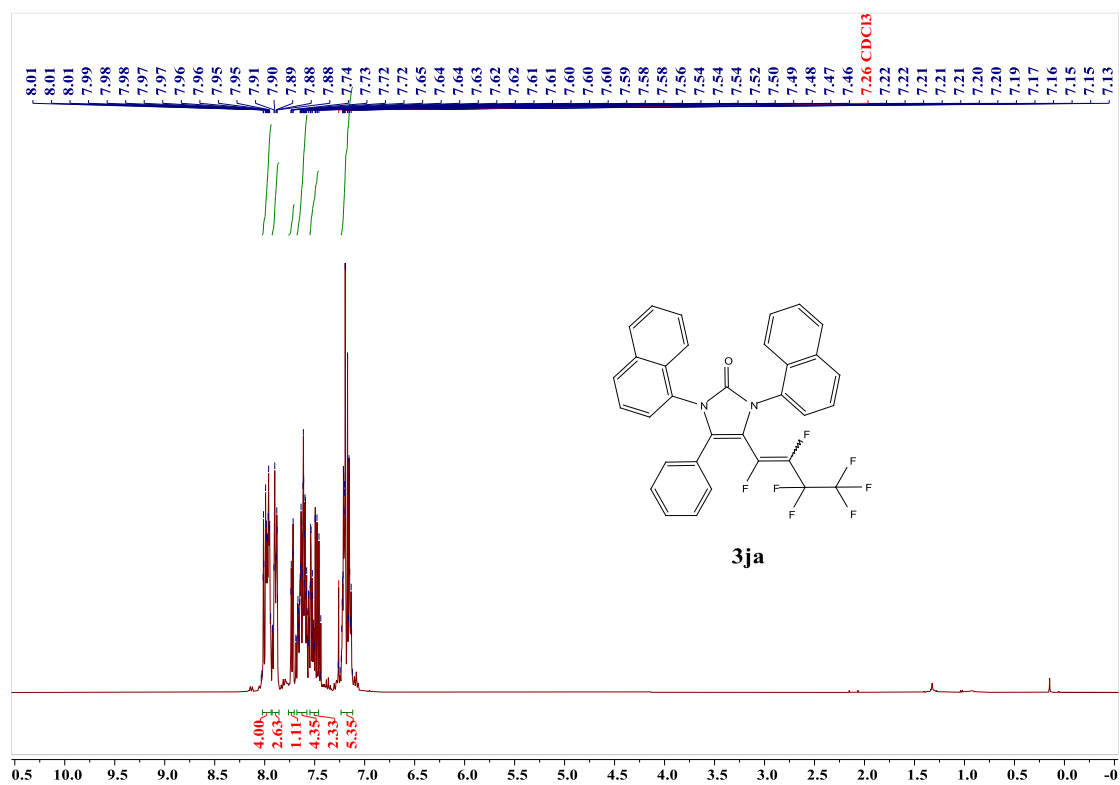

$^{19}\text{F}$  NMR spectra of the product **3ja** (376 MHz,  $\text{CDCl}_3$ )

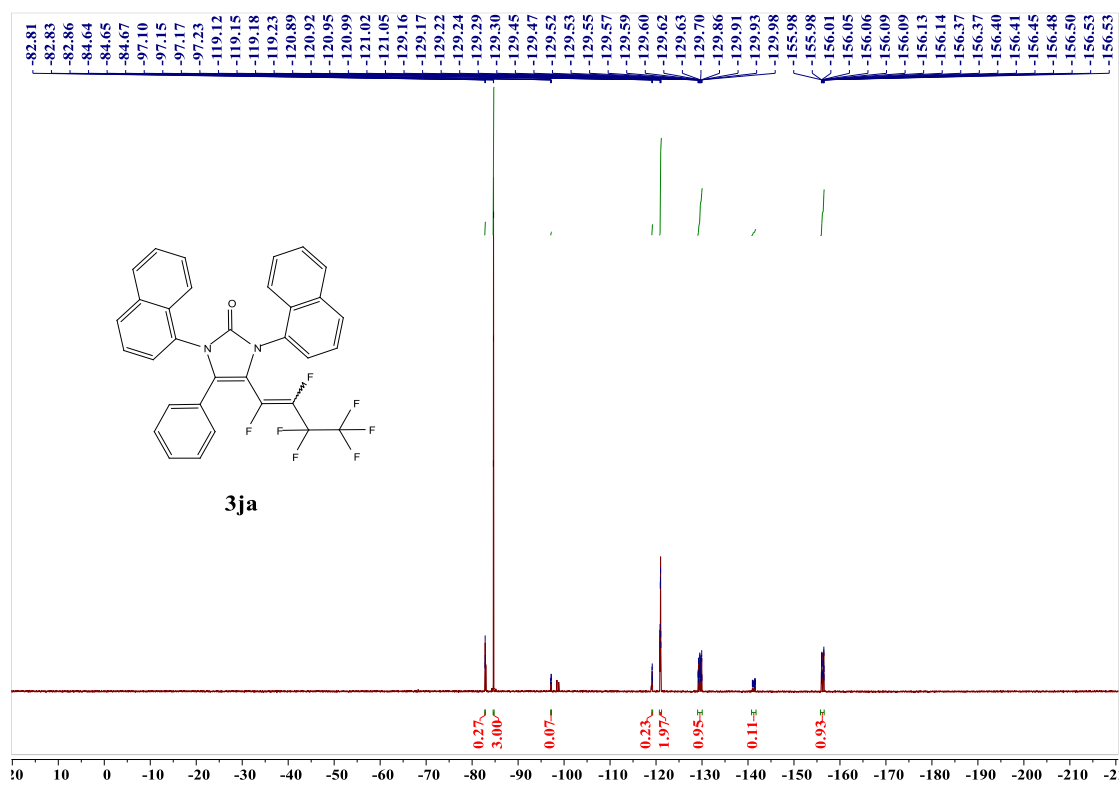

$^{13}\text{C}$  NMR spectra of the product **3ja** (100 MHz,  $\text{CDCl}_3$ )

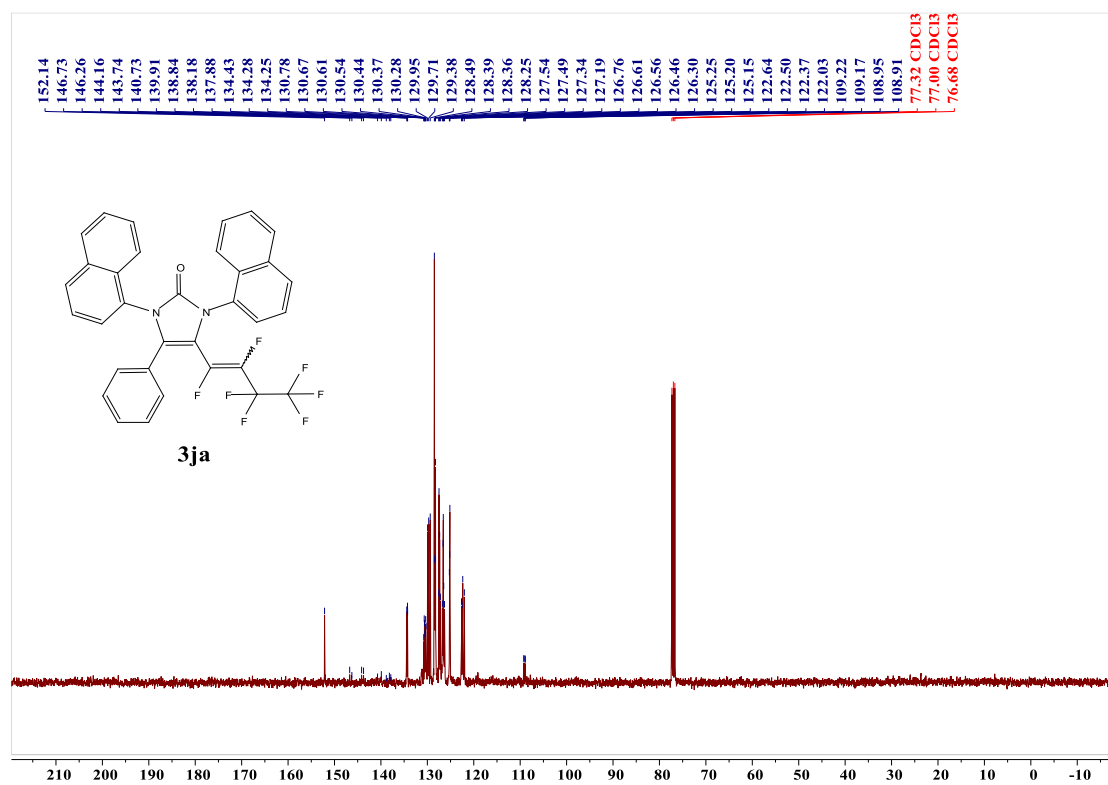

$^1\text{H}$  NMR spectra of the product **3ma** (400 MHz,  $\text{CDCl}_3$ )

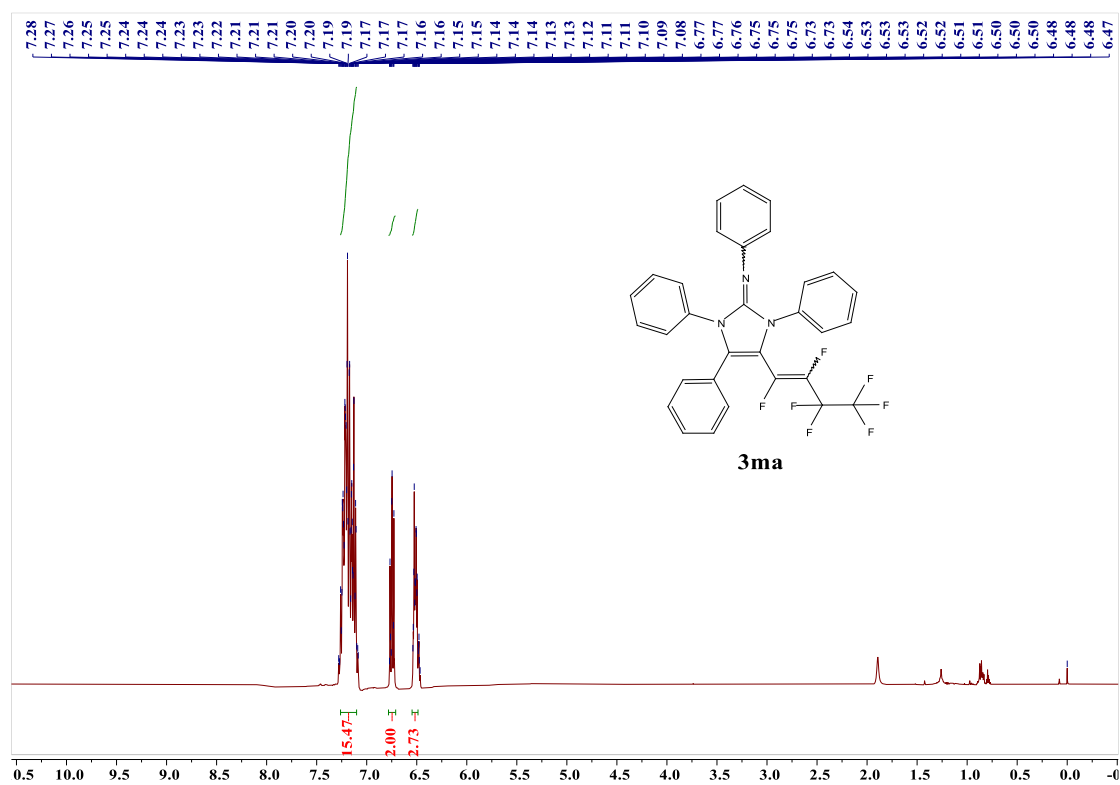



<sup>19</sup>F NMR spectra of the product **3ma** (376 MHz, CDCl<sub>3</sub>)

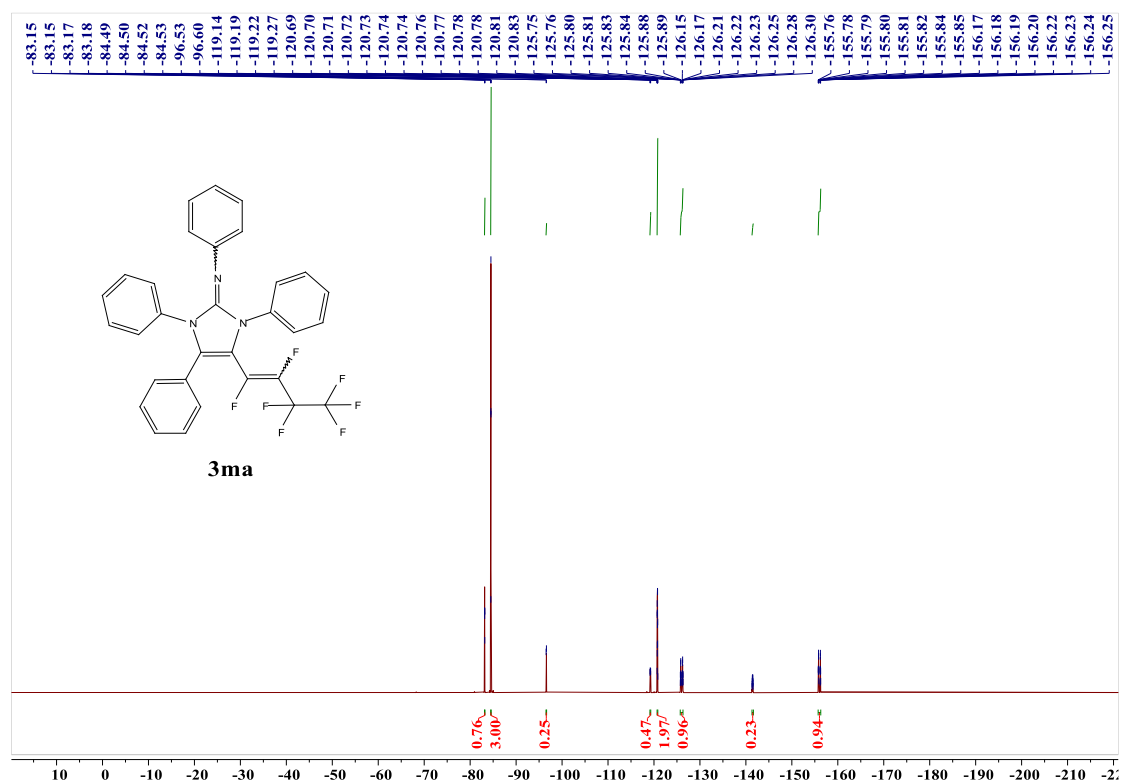

<sup>13</sup>C NMR spectra of the product **3ma** (100 MHz, CDCl<sub>3</sub>)

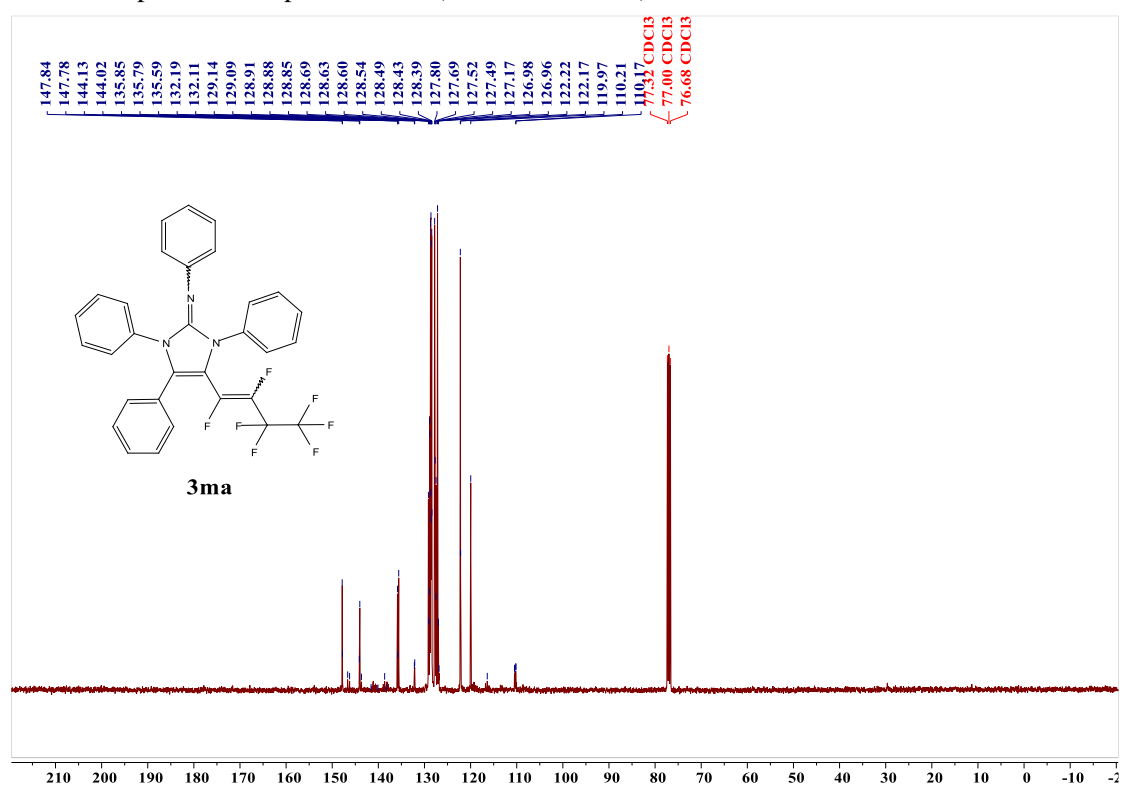

<sup>1</sup>H NMR spectra of the product **3av** (400 MHz, CDCl<sub>3</sub>)

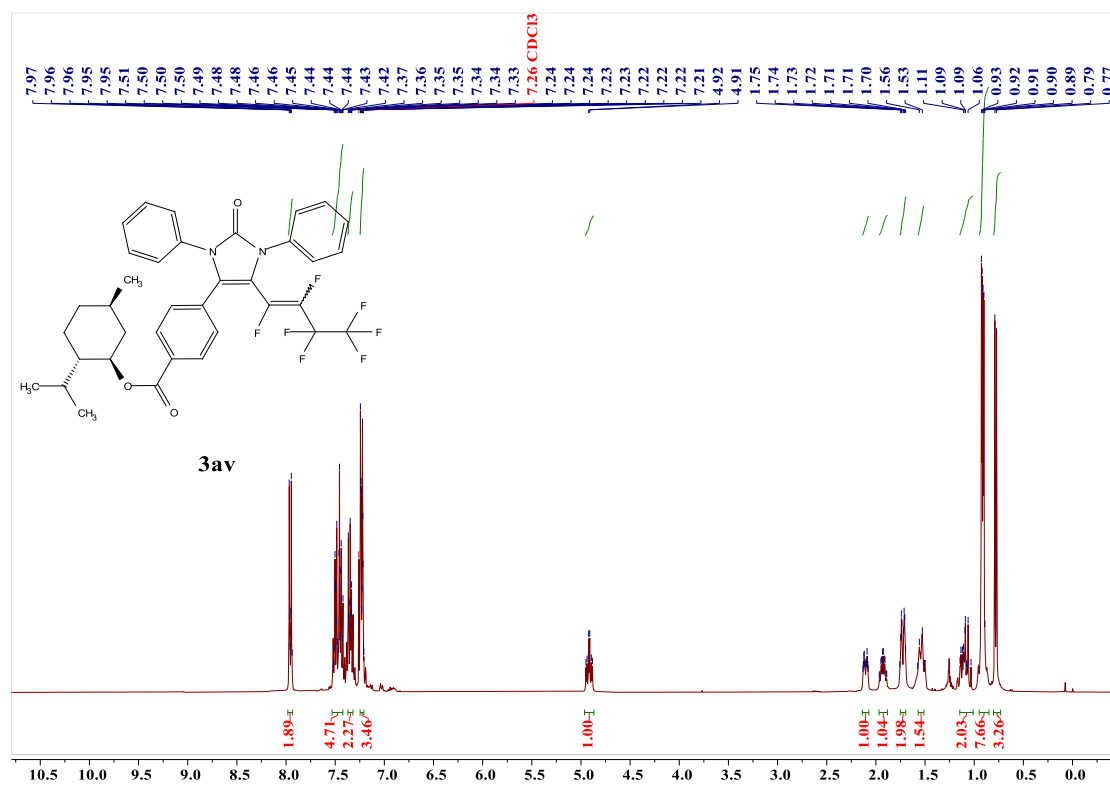

<sup>19</sup>F NMR spectra of the product **3av** (376 MHz, CDCl<sub>3</sub>)

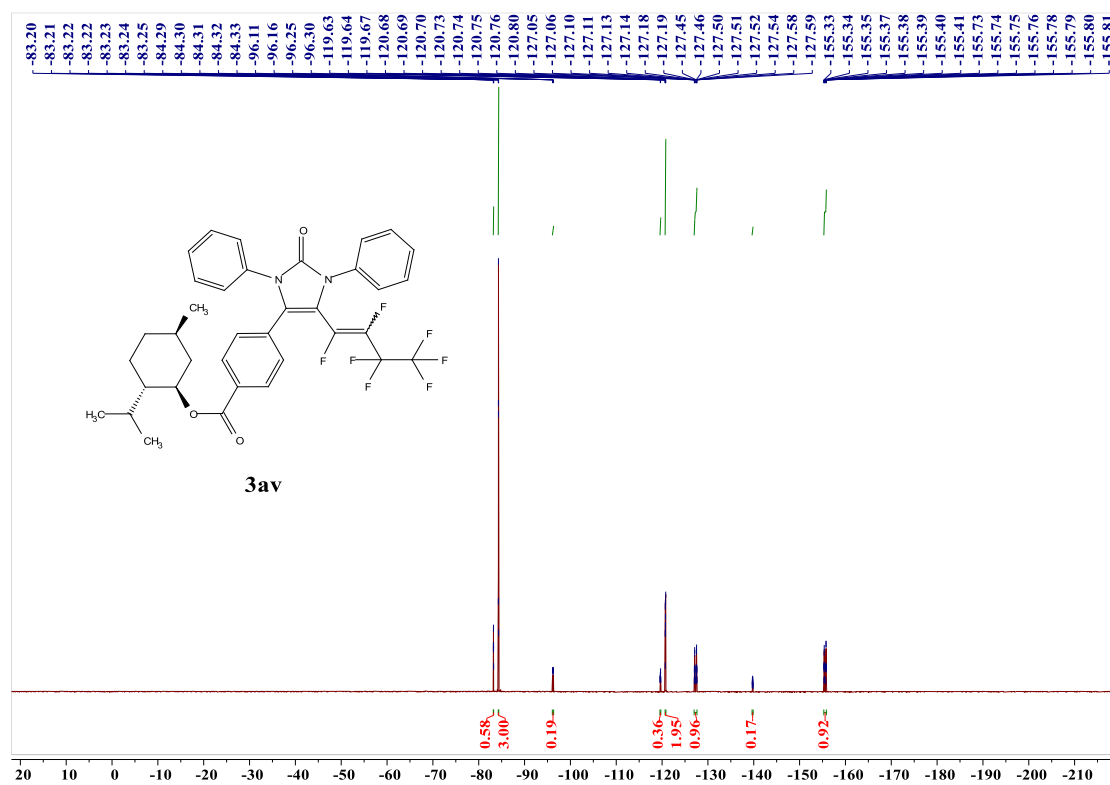

$^{13}\text{C}$  NMR spectra of the product **3av** (100 MHz,  $\text{CDCl}_3$ )

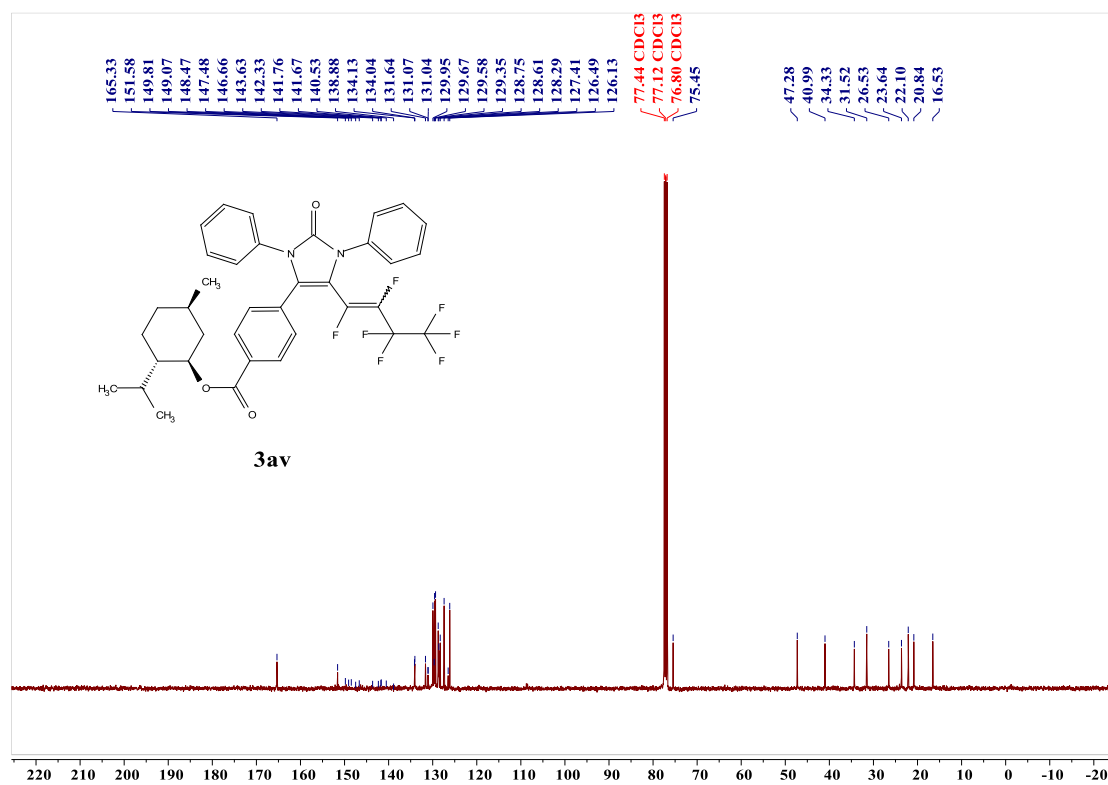

$^1\text{H}$  NMR spectra of the product **3aw** (400 MHz,  $\text{CDCl}_3$ )

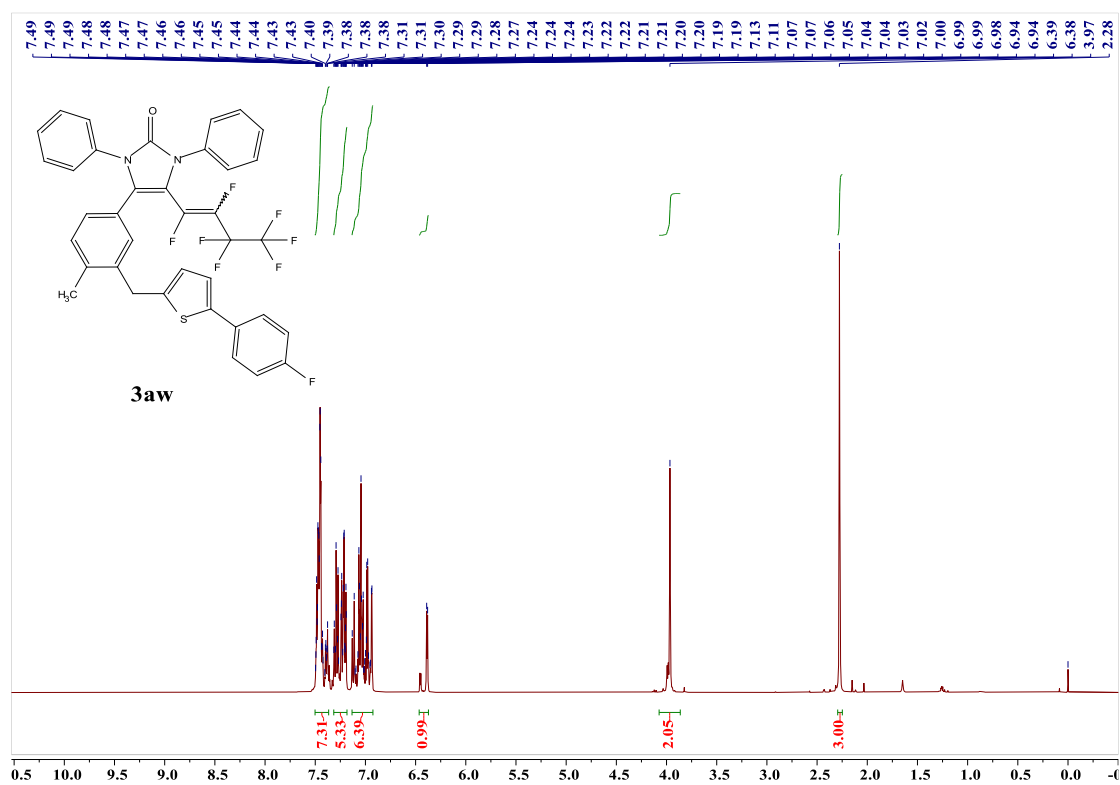

<sup>19</sup>F NMR spectra of the product **3aw** (376 MHz, CDCl<sub>3</sub>)

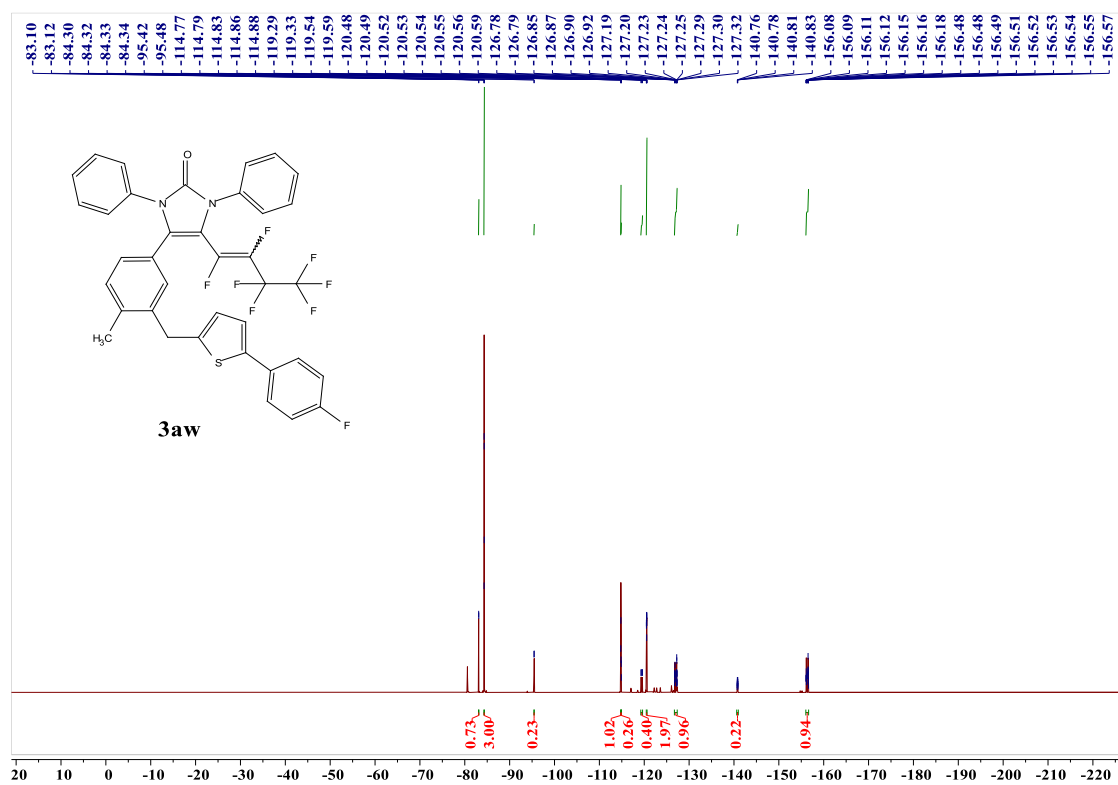

<sup>13</sup>C NMR spectra of the product **3aw** (100 MHz, CDCl<sub>3</sub>)

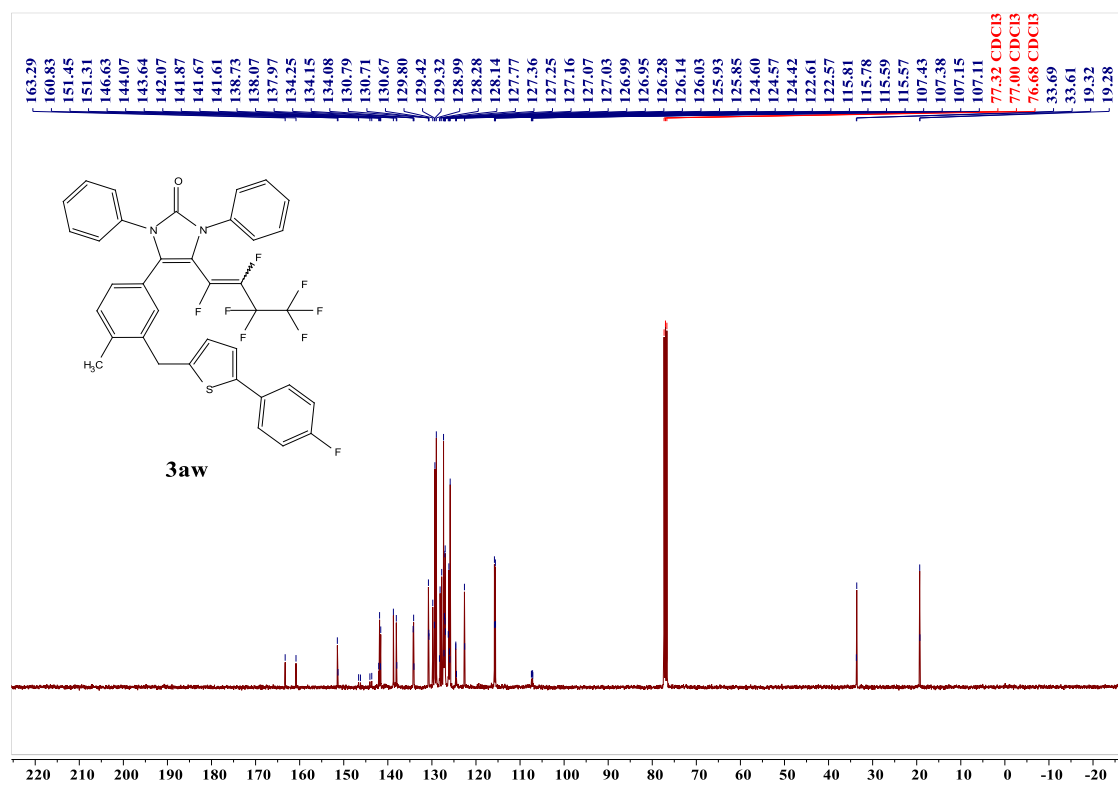

Supplement: d4qo01173b1.pdf [file d4qo01173b1.pdf]
